# Supplementary material for: Genome-Wide Tissue-Specific Occupancy of the Hox Protein Ultrabithorax and Hox Cofactor Homothorax in Drosophila
Source: PLoS One. 2011 Apr 5;6(4):e14686. doi: 10.1371/journal.pone.0014686 (PMC3071676; doi:10.1371/journal.pone.0014686)
Supplement: Table S2 — High confidence Hth haltere peaks and target genes (Slattery et al., Choo et al.) All Hth haltere peaks called in this study that also overlap a top 10% Hth peak (TAS p-value) called from the Choo et al. data. Called target gene(s) associated with each peak are also indicated, and enriched GO categories are represented in the second sheet. (0.21 MB XLS) [file pone.0014686.s007.xls]

## Sheet: Haltere_Hth_High-Confidence
Haltere, Hth, High Confidence
Chromosome	Peak Start	Peak Stop	FBID	Gene
2L	429682	430660	FBgn0004583	ex-RA
2L	480832	481232	FBgn0043364	cbt-RA
2L	670259	670987	FBgn0000497	ds-RA
2L	671348	671885	FBgn0000497	ds-RA
2L	1158110	1158551	FBgn0028388	capt-RA
2L	1426483	1427019	FBgn0002543	lea-RA
2L	2161565	2162088	FBgn0000097	aop-RA
2L	2374434	2374808	FBgn0031419	CG15390-RA
2L	2483471	2483792	FBgn0031429	CG15393-RA
2L	2751737	2752282	FBgn0031453	CG9894-RB
2L	2765624	2766170	FBgn0031458	aph-1-RA
2L	2830170	2830755	FBgn0031464	Duox-RB
2L	3562068	3562532	FBgn0004892	sob-RA
2L	3632384	3632921	FBgn0000721;FBgn0000721	for-RJ;for-RK
2L	3777110	3777659	FBgn0004893	bowl-RA
2L	4222822	4223025	FBgn0031590	CG3702-RA
2L	5239405	5240642	FBgn0003716	tkv-RB
2L	5252660	5253786	FBgn0003716	tkv-RC
2L	5278325	5278820	FBgn0031696	Bub1-RA
2L	5292628	5292937	FBgn0016076	vri-RC
2L	5403629	5403935	FBgn0016660	H15-RA
2L	6562132	6562598	FBgn0026585	Ent2-RA
2L	6787156	6787772	FBgn0015776	nrv1-RA
2L	7320688	7321210	FBgn0004009	wg-RB
2L	7372055	7372600	FBgn0031903	Wnt10-RA
2L	7423190	7423611	FBgn0031912	CG5261-RB
2L	7424828	7425821	FBgn0031912	CG5261-RB
2L	7573788	7574426	FBgn0085403	Rapgap1-RD
2L	7608031	7608266	FBgn0031926	CG6739-RA
2L	8162315	8163542	FBgn0031993;FBgn0031993;FBgn0031993;FBgn0031993	CG8486-RD;CG8486-RE;CG8486-RF;CG8486-RG
2L	8212851	8213448	FBgn0032001;FBgn0032001	CG8360-RA;CG8360-RB
2L	8277664	8278015	FBgn0003502;FBgn0003502	Btk29A-RC;Btk29A-RA
2L	8299410	8299762	FBgn0003502	Btk29A-RB
2L	8535066	8536073	FBgn0028394;FBgn0028394	CG17834-RB;CG17834-RD
2L	8691503	8691854	FBgn0004914	Hnf4-RB
2L	9447579	9447787	FBgn0002973	numb-RA
2L	9449088	9449484	FBgn0002973	numb-RA
2L	10413489	10414002	FBgn0032243;FBgn0032243;FBgn0032243	Klp31E-RA;Klp31E-RC;Klp31E-RD
2L	11059949	11060890	FBgn0032330	Samuel-RA
2L	11305745	11306422	FBgn0032359	Osi21-RA
2L	11323950	11324225	FBgn0032360	CG14926-RA
2L	12002393	12002741	FBgn0032394	CG6746-RA
2L	12483801	12484300	FBgn0259176	bun-RB
2L	13164979	13165590	FBgn0032474	DnaJ-H-RB
2L	13373568	13374459	FBgn0032513	CG6565-RA
2L	13835205	13835588	FBgn0028509	cenG1A-RB
2L	14225801	14226145	FBgn0016930	smi35A-RB
2L	14226256	14226405	FBgn0016930	smi35A-RB
2L	14422062	14422718	FBgn0028871	Cpr35B-RA
2L	14460661	14461330	FBgn0028844	CG15283-RB
2L	14490103	14490642	FBgn0005771	noc-RA
2L	14513107	14514054	FBgn0053648	CG33648-RA
2L	14552506	14553414	FBgn0250844	CG4218-RA
2L	15413413	15414335	FBgn0028891	CG18482-RA
2L	16684010	16684735	FBgn0261278	grp-RA
2L	17749755	17750133	FBgn0015609;FBgn0015609;FBgn0015609;FBgn0015609;FBgn0015609;FBgn0015609;FBgn0015609;FBgn0015609;FBgn0015609;FBgn0015609;FBgn0015609;FBgn0015609	CadN-RE;CadN-RH;CadN-RA;CadN-RF;CadN-RC;CadN-RB;CadN-RD;CadN-RG;CadN-RI;CadN-RJ;CadN-RK;CadN-RL
2L	18145274	18145581	FBgn0041184;FBgn0041184	Socs36E-RA;Socs36E-RB
2L	18312399	18312817	FBgn0000636;FBgn0000636;FBgn0000636;FBgn0000636	Fas3-RA;Fas3-RB;Fas3-RC;Fas3-RD
2L	18946341	18946779	FBgn0032724	CG10428-RA
2L	19044985	19045333	FBgn0086441	hkl-RB
2L	19136467	19137015	FBgn0010300	brat-RA
2L	19321667	19322244	FBgn0032769	CG10750-RA
2L	19323325	19324094	FBgn0032769	CG10750-RA
2L	19572520	19572987	FBgn0005672;FBgn0005672	spi-RE;spi-RB
2L	19575612	19575892	FBgn0005672	spi-RG
2L	20349976	20350364	FBgn0011638	La-RB
2L	21017571	21018244	FBgn0250867	CG42238-RA
2L	21794756	21795178	FBgn0051612	CG31612-RB
2L	21846795	21847185	FBgn0003866	tsh-RB
2R	1540943	1541596	FBgn0027507	CG1344-RA
2R	2034833	2034970	FBgn0000546	EcR-RF
2R	2035089	2035375	FBgn0000546	EcR-RF
2R	2045118	2045428	FBgn0000546;FBgn0000546	EcR-RD;EcR-RE
2R	2107681	2108043	FBgn0033073	bin3-RA
2R	2435123	2435707	FBgn0086655;FBgn0086655	jing-RB;jing-RI
2R	2550684	2551152	FBgn0000054;FBgn0000054;FBgn0000054	Adf1-RA;Adf1-RB;Adf1-RC
2R	2976051	2977276	FBgn0028642	esn-RB
2R	3376592	3377170	FBgn0259745	wech-RB
2R	4916080	4917163	FBgn0033365;FBgn0033365	CG8170-RA;CG8170-RB
2R	4997384	4998334	FBgn0033378	tsu-RA
2R	5328906	5329820	FBgn0029092	ced-6-RC
2R	5434412	5434954	FBgn0033421	CG1888-RA
2R	5599398	5599958	FBgn0010316	dap-RA
2R	5748255	5748839	FBgn0027580;FBgn0027580	CG1516-RI;CG1516-RE
2R	5846770	5847825	FBgn0033466;FBgn0033466	CG12130-RA;CG12130-RB
2R	6010624	6011212	FBgn0050011;FBgn0050011;FBgn0050011	gem-RA;gem-RC;gem-RD
2R	6046134	6047340	FBgn0033495;FBgn0033495	CG12214-RB;CG12214-RA
2R	6158838	6159072	FBgn0033504;FBgn0033504	CAP-RK;CAP-RO
2R	6453919	6454113	FBgn0004399;FBgn0004399;FBgn0004399;FBgn0004399	psq-RK;psq-RG;psq-RF;psq-RE
2R	6455071	6455552	FBgn0004399;FBgn0004399;FBgn0004399;FBgn0004399	psq-RK;psq-RG;psq-RF;psq-RE
2R	6468134	6468295	FBgn0004399;FBgn0004399;FBgn0004399	psq-RJ;psq-RH;psq-RD
2R	6489009	6489221	FBgn0033538;FBgn0033538	CG11883-RA;CG11883-RB
2R	6695687	6697271	FBgn0027499	CG12340-RA
2R	7068879	7069231	FBgn0003396	shn-RA
2R	7069864	7070469	FBgn0003396	shn-RA
2R	7084887	7085698	FBgn0003396	shn-RB
2R	7090312	7090631	FBgn0003396	shn-RC
2R	7488706	7489690	FBgn0033636;FBgn0033636	tou-RA;tou-RE
2R	7502013	7502285	FBgn0033636;FBgn0033636	tou-RA;tou-RE
2R	7553538	7553771	FBgn0050035	CG30035-RA
2R	7872858	7873125	FBgn0011704	RnrS-RA
2R	8767392	8767785	FBgn0002069	Aats-asp-RA
2R	9427541	9428014	FBgn0033853	CG6145-RB
2R	9962062	9962678	FBgn0259183	CG42287-RA
2R	10798898	10799164	FBgn0027596	CG10249-RC
2R	11005999	11006809	FBgn0015371;FBgn0015371;FBgn0015371	chn-RC;chn-RD;chn-RB
2R	11015503	11016215	FBgn0015371	chn-RA
2R	11704575	11705329	FBgn0083919	Zasp52-RC
2R	12612235	12612438	FBgn0050463;FBgn0050463;FBgn0050463;FBgn0050463	CG30463-RA;CG30463-RB;CG30463-RC;CG30463-RD
2R	12715525	12716021	FBgn0085489	CG34460-RA
2R	12914322	12914909	FBgn0023172;FBgn0023172;FBgn0023172	RhoGEF2-RE;RhoGEF2-RF;RhoGEF2-RD
2R	13308353	13308789	FBgn0022029;FBgn0022029;FBgn0022029;FBgn0022029	l(2)k01209-RA;l(2)k01209-RB;l(2)k01209-RC;l(2)k01209-RD
2R	13512627	13513029	FBgn0004400	rhi-RA
2R	14194440	14194679	FBgn0034327	CG14505-RB
2R	14217681	14218166	FBgn0040737	Tango8-RA
2R	14232003	14233200	FBgn0010575;FBgn0010575;FBgn0010575	sbb-RD;sbb-RE;sbb-RF
2R	14244377	14245312	FBgn0010575	sbb-RG
2R	14560163	14560586	FBgn0023214	edl-RA
2R	15826598	15827066	FBgn0050447;FBgn0050447	CG30447-RA;CG30447-RB
2R	15837583	15838088	FBgn0034478	CG10822-RA
2R	17362964	17363366	FBgn0010415;FBgn0010415;FBgn0010415;FBgn0010415;FBgn0010415;FBgn0010415	Sdc-RA;Sdc-RB;Sdc-RC;Sdc-RD;Sdc-RE;Sdc-RF
2R	17384913	17385313	FBgn0010470	Fkbp13-RC
2R	17621723	17621885	FBgn0034657	LBR-RC
2R	17622006	17622439	FBgn0034657	LBR-RC
2R	17751206	17752103	FBgn0034667	comr-RA
2R	18066180	18066608	FBgn0050279	CG30279-RA
2R	18198898	18199331	FBgn0034718;FBgn0034718	wdp-RD;wdp-RB
2R	18446715	18447199	FBgn0003175	px-RA
2R	18573917	18574184	FBgn0020257	ppa-RA
2R	18820991	18821304	FBgn0034800	CG3788-RA
2R	19253913	19254376	FBgn0034853	CG13550-RA
2R	19865575	19866523	FBgn0005612	Sox14-RA
2R	20701616	20702009	FBgn0000157;FBgn0000157;FBgn0000157	Dll-RB;Dll-RA;Dll-RC
2R	20830235	20830951	FBgn0035083	Tina-1-RA
3L	552540	553436	FBgn0035142	hipk-RA
3L	618238	618790	FBgn0016715	Reg-2-RA
3L	620339	621679	FBgn0016715	Reg-2-RA
3L	627185	627972	FBgn0035147	CG12030-RA
3L	760800	761712	FBgn0000575	emc-RA
3L	2774175	2774598	FBgn0044452	Atg2-RA
3L	2808635	2808901	FBgn0035376	CG2083-RB
3L	2834182	2835237	FBgn0035377	CG14952-RA
3L	3178460	3178961	FBgn0035411;FBgn0035411	CG12734-RA;CG12734-RB
3L	3247355	3247787	FBgn0035426	CG12078-RA
3L	3384634	3385054	FBgn0035445	CG12014-RA
3L	3394712	3395187	FBgn0035445	CG12014-RA
3L	3810471	3810967	FBgn0052263	CG32263-RA
3L	4252519	4253156	FBgn0041171	ago-RA
3L	4382810	4383297	FBgn0035539;FBgn0035539	CG7447-RA;CG7447-RB
3L	5132259	5132714	FBgn0035589	CG4618-RA
3L	6810973	6811224	FBgn0086680	vvl-RA
3L	8448844	8449355	FBgn0010825;FBgn0010825;FBgn0010825	Gug-RA;Gug-RB;Gug-RC
3L	8649858	8650404	FBgn0035922	CG6486-RB
3L	8652584	8653360	FBgn0035922	CG6486-RB
3L	8661328	8662176	FBgn0001168	h-RB
3L	8758825	8759495	FBgn0261259;FBgn0261259	Fhos-RA;Fhos-RB
3L	8905838	8906342	FBgn0035936;FBgn0035936	Tsp66E-RA;Tsp66E-RC
3L	9419539	9420692	FBgn0015296	Shc-RA
3L	9685984	9686436	FBgn0036030	CG6767-RB
3L	9757516	9758001	FBgn0036043;FBgn0036043;FBgn0036043;FBgn0036043;FBgn0036043;FBgn0036043;FBgn0036043	CG8177-RI;CG8177-RJ;CG8177-RK;CG8177-RC;CG8177-RF;CG8177-RG;CG8177-RH
3L	10733176	10733521	FBgn0036101	NijA-RA
3L	10753048	10753595	FBgn0036102	CG12523-RA
3L	10848952	10849143	FBgn0026160	tna-RA
3L	10927717	10928475	FBgn0054050	CG34050-RA
3L	10943811	10944165	FBgn0054050	CG34050-RA
3L	11112456	11112804	FBgn0036134	Mnf-RH
3L	11291151	11291380	FBgn0036152	CG6175-RB
3L	11291677	11291833	FBgn0036152	CG6175-RB
3L	11317867	11318177	FBgn0036154	CG6168-RB
3L	11321555	11322032	FBgn0036154	CG6168-RB
3L	11336007	11336805	FBgn0036155	CG6163-RA
3L	11362275	11363353	FBgn0036155	CG6163-RA
3L	11367034	11367518	FBgn0036155	CG6163-RA
3L	11373878	11374325	FBgn0036156	CG11726-RA
3L	11375496	11375981	FBgn0036156	CG11726-RA
3L	12075658	12075776	FBgn0250876	Sema-5c-RB
3L	12089098	12089780	FBgn0036246	CG17154-RA
3L	12131624	12131951	FBgn0036257	RhoGAP68F-RA
3L	12550851	12552042	FBgn0036302;FBgn0036302;FBgn0036302;FBgn0036302	sowah-RD;sowah-RH;sowah-RG;sowah-RI
3L	13175662	13176237	FBgn0086916	snky-RA
3L	14627777	14628708	FBgn0041604;FBgn0041604	dlp-RA;dlp-RB
3L	15173995	15174114	FBgn0036489	CG7011-RA
3L	15184882	15185774	FBgn0036490	CG6888-RA
3L	15526256	15526922	FBgn0004396;FBgn0004396	CrebA-RA;CrebA-RB
3L	15581222	15581998	FBgn0036518;FBgn0036518;FBgn0036518;FBgn0036518	RhoGAP71E-RB;RhoGAP71E-RA;RhoGAP71E-RC;RhoGAP71E-RD
3L	16009523	16009941	FBgn0036558	mib1-RA
3L	16168759	16169154	FBgn0053795	CG33795-RA
3L	16172828	16173223	FBgn0053795	CG33795-RA
3L	16208492	16209433	FBgn0036577	CG13073-RA
3L	16477939	16478379	FBgn0004569	argos-RA
3L	16482831	16483109	FBgn0260388	CG42514-RC
3L	17426534	17427143	FBgn0052176	CG32176-RA
3L	18178912	18179429	FBgn0003997	W-RA
3L	18186010	18186126	FBgn0003997	W-RA
3L	18187225	18188572	FBgn0036782	CG7320-RA
3L	18226265	18226777	FBgn0036783	CheA75a-RA
3L	18228943	18229568	FBgn0036783	CheA75a-RA
3L	19035679	19036574	FBgn0002945	nkd-RA
3L	19160276	19161174	FBgn0016797	fz2-RC
3L	19176771	19177407	FBgn0016797	fz2-RB
3L	19552316	19552627	FBgn0036886	CG9300-RA
3L	19552745	19553271	FBgn0036886	CG9300-RA
3L	19553852	19554441	FBgn0036886	CG9300-RA
3L	19554556	19554806	FBgn0036886	CG9300-RA
3L	20396310	20397034	FBgn0028978	trbl-RA
3L	20723090	20723565	FBgn0037016	CG13252-RA
3L	20771402	20771913	FBgn0037020	CG4289-RA
3L	20777905	20778420	FBgn0037021	CG11399-RB
3L	20944363	20944528	FBgn0011591	fng-RA
3L	21091795	21092988	FBgn0053285	CG33285-RA
3L	21246889	21247223	FBgn0004865	Eip78C-RC
3L	21378349	21378466	FBgn0261258	rgn-RA
3L	22169645	22170656	FBgn0037152	CG15374-RA
3R	850492	850758	FBgn0037292	CG2022-RB
3R	913165	913598	FBgn0010313	corto-RA
3R	1156966	1157121	FBgn0013576	l(3)82Fd-RD
3R	2738617	2738769	FBgn0260642;FBgn0260642;FBgn0260642;FBgn0260642;FBgn0260642;FBgn0260642	Antp-RH;Antp-RD;Antp-RL;Antp-RF;Antp-RJ;Antp-RK
3R	2862944	2863800	FBgn0024289	Sodh-1-RA
3R	2934399	2935291	FBgn0261238;FBgn0261238;FBgn0261238;FBgn0261238;FBgn0261238;FBgn0261238	Alh-RB;Alh-RC;Alh-RE;Alh-RF;Alh-RH;Alh-RI
3R	3148853	3149533	FBgn0037498	CG10029-RA
3R	3299691	3300044	FBgn0037504	CG1142-RA
3R	3788844	3789198	FBgn0000504	dsx-RC
3R	3792551	3792699	FBgn0000504;FBgn0000504	dsx-RA;dsx-RB
3R	3794773	3795285	FBgn0000504;FBgn0000504	dsx-RA;dsx-RB
3R	4159836	4160222	FBgn0003129	Poxm-RC
3R	4175134	4175801	FBgn0261108	Atg13-RA
3R	4502348	4502936	FBgn0037610	CG8043-RA
3R	4753224	4753825	FBgn0003177	pyd-RJ
3R	5055067	5055180	FBgn0003165	pum-RB
3R	5167032	5167853	FBgn0053936;FBgn0053936	CG33936-RB;CG33936-RA
3R	5205098	5205562	FBgn0000723	Fps85D-RC
3R	5358996	5359189	FBgn0000244	by-RA
3R	5725044	5725523	FBgn0250818;FBgn0250818;FBgn0250818	CG34360-RA;CG34360-RC;CG34360-RD
3R	6209847	6210242	FBgn0259938	cwo-RA
3R	6213457	6213928	FBgn0259938	cwo-RA
3R	6442511	6442868	FBgn0001235;FBgn0001235;FBgn0001235;FBgn0001235	hth-RA;hth-RB;hth-RC;hth-RF
3R	7023039	7023462	FBgn0037870	CG18577-RA
3R	7482237	7482772	FBgn0259227	CG42327-RE
3R	7503880	7504118	FBgn0037931	CG18476-RA
3R	7604085	7604562	FBgn0086910	l(3)neo38-RB
3R	7644797	7645313	FBgn0019624	CoVa-RA
3R	7713968	7714476	FBgn0037960	mthl5-RA
3R	8139565	8140491	FBgn0038011	CG4066-RA
3R	8195274	8195699	FBgn0001149	GstD1-RA
3R	8842011	8842565	FBgn0020496	CtBP-RB
3R	9767330	9768226	FBgn0038188	Art9-RA
3R	10103974	10104427	FBgn0003862;FBgn0003862;FBgn0003862;FBgn0003862;FBgn0003862	trx-RD;trx-RC;trx-RA;trx-RB;trx-RE
3R	10481081	10481229	FBgn0086686	l(3)L1231-RA
3R	10541646	10542252	FBgn0053967	CG33967-RA
3R	10743934	10744119	FBgn0038279	CG3837-RA
3R	11100429	11101188	FBgn0000283	Cp190-RA
3R	11379418	11380707	FBgn0038350	CG18516-RA
3R	11468555	11470803	FBgn0038351	CG5302-RA
3R	11733196	11734118	FBgn0038381	CG3303-RA
3R	12107434	12107984	FBgn0250823;FBgn0250823	gish-RA;gish-RC
3R	12512867	12513526	FBgn0051498	CG31498-RA
3R	12943337	12943937	FBgn0014141;FBgn0014141	cher-RA;cher-RG
3R	13505182	13505417	FBgn0038535	alt-RA
3R	13525702	13526414	FBgn0051249	CG31249-RA
3R	13968224	13968969	FBgn0038567	CG14316-RA
3R	14274021	14274460	FBgn0004652	fru-RL
3R	14567030	14567843	FBgn0024329	Mekk1-RB
3R	14621052	14621489	FBgn0038652;FBgn0038652	CG7720-RB;CG7720-RC
3R	15827577	15828402	FBgn0038755	Hs6st-RA
3R	16118128	16118612	FBgn0028386	cic-RB
3R	17012673	17013166	FBgn0025803;FBgn0025803	SNF4Agamma-RC;SNF4Agamma-RP
3R	17475454	17475769	FBgn0011766	E2f-RB
3R	17478914	17479072	FBgn0011766	E2f-RB
3R	17662381	17662857	FBgn0041229	Gr93a-RA
3R	17664020	17664573	FBgn0045470	Gr93b-RB
3R	17867465	17867822	FBgn0017397;FBgn0017397;FBgn0017397;FBgn0017397;FBgn0017397	how-RB;how-RA;how-RC;how-RD;how-RE
3R	18019852	18020407	FBgn0038934	Gld2-RA
3R	18493027	18493577	FBgn0038999	CG17623-RA
3R	18974149	18974645	FBgn0004644;FBgn0004644	hh-RA;hh-RB
3R	19159393	19159746	FBgn0003118	pnt-RB
3R	19181740	19182079	FBgn0016119	ATPsyn-Cf6-RA
3R	19863356	19863918	FBgn0039141;FBgn0039141	spas-RA;spas-RB
3R	21460061	21460520	FBgn0039350;FBgn0039350;FBgn0039350;FBgn0039350	jigr1-RA;jigr1-RB;jigr1-RD;jigr1-RE
3R	21466159	21466633	FBgn0039350	jigr1-RC
3R	21563819	21564237	FBgn0051092;FBgn0051092;FBgn0051092;FBgn0051092;FBgn0051092	LpR2-RA;LpR2-RC;LpR2-RD;LpR2-RE;LpR2-RG
3R	21877987	21878425	FBgn0260946;FBgn0260946	exo84-RA;exo84-RB
3R	21924661	21925198	FBgn0039411;FBgn0039411	dys-RC;dys-RD
3R	24361898	24362460	FBgn0003137;FBgn0003137;FBgn0003137;FBgn0003137	Ppn-RC;Ppn-RE;Ppn-RF;Ppn-RG
3R	26083200	26084306	FBgn0039761	CG18404-RA
3R	26097843	26098594	FBgn0010113;FBgn0010113	hdc-RA;hdc-RC
3R	26213725	26214419	FBgn0015221	Fer2LCH-RB
3R	27767199	27767974	FBgn0011224	heph-RT
3R	27803475	27804114	FBgn0039886	CG2003-RA
4	77089	78006	FBgn0004859	ci-RA
4	537756	538345	FBgn0004607	zfh2-RA
X	1035803	1036362	FBgn0040365	CG14628-RA
X	1214588	1214976	FBgn0025641	DAAM-RB
X	1935389	1935742	FBgn0000667;FBgn0000667;FBgn0000667	Actn-RC;Actn-RB;Actn-RA
X	2016912	2018266	FBgn0004860	ph-d-RB
X	2028616	2028737	FBgn0004861	ph-p-RA
X	2028854	2030128	FBgn0004861	ph-p-RA
X	2030960	2031728	FBgn0004861	ph-p-RB
X	2197757	2198321	FBgn0023526	CG2865-RA
X	2541440	2542332	FBgn0003371	sgg-RK
X	2858657	2859205	FBgn0028369	kirre-RB
X	3056614	3057079	FBgn0028746	CG18508-RA
X	3376715	3377475	FBgn0029664	CG10802-RA
X	3588246	3588726	FBgn0023215;FBgn0023215	Mnt-RA;Mnt-RH
X	5590099	5590798	FBgn0027564	CG3149-RA
X	5641358	5641944	FBgn0029798	CG4078-RA
X	5794048	5794934	FBgn0000042;FBgn0000042;FBgn0000042	Act5C-RA;Act5C-RC;Act5C-RD
X	5914737	5915591	FBgn0029003	mab-21-RA
X	5924186	5924742	FBgn0003302	rux-RA
X	6237794	6238040	FBgn0029866	CG3842-RB
X	6438261	6438705	FBgn0085446;FBgn0085446;FBgn0085446;FBgn0085446;FBgn0085446;FBgn0085446	CG34417-RC;CG34417-RD;CG34417-RF;CG34417-RH;CG34417-RI;CG34417-RJ
X	6671162	6671707	FBgn0003390	shf-RA
X	6757008	6757551	FBgn0064121;FBgn0064122	CG33692-RB;CG33691-RB
X	6877080	6877734	FBgn0004646	ogre-RA
X	6878234	6878735	FBgn0261284	bou-RA
X	6879094	6879594	FBgn0261284	bou-RA
X	7218726	7219085	FBgn0029944	Dok-RA
X	7591088	7591430	FBgn0029504	CHES-1-like-RA
X	7621996	7623209	FBgn0029957	CG12155-RA
X	8090028	8090545	FBgn0243505	sdt-RB
X	8146405	8146532	FBgn0030027	CG1632-RA
X	8790228	8791134	FBgn0011661	Moe-RF
X	9478739	9479855	FBgn0001186;FBgn0001186	Hex-A-RA;Hex-A-RB
X	10010145	10010424	FBgn0083940;FBgn0083940	CG34104-RA;CG34104-RB
X	10159310	10159856	FBgn0040942	CG12643-RA
X	11516781	11516903	FBgn0004370;FBgn0004370;FBgn0004370;FBgn0004370	Ptp10D-RD;Ptp10D-RB;Ptp10D-RA;Ptp10D-RE
X	11609420	11610252	FBgn0030329	CG1837-RA
X	11814869	11815335	FBgn0030357	Sclp-RB
X	12149225	12150879	FBgn0052655	CG32655-RA
X	12473554	12474111	FBgn0030400;FBgn0030400	CG11138-RC;CG11138-RD
X	12568441	12569299	FBgn0011837;FBgn0011837	Tis11-RB;Tis11-RA
X	12569483	12570819	FBgn0011837;FBgn0011837	Tis11-RB;Tis11-RA
X	12629139	12629823	FBgn0024308	Smr-RC
X	12645032	12645649	FBgn0030418	CG4004-RB
X	12645842	12646581	FBgn0030418	CG4004-RB
X	13053598	13053992	FBgn0030457	CG12096-RA
X	13128629	13129022	FBgn0052639	CG32639-RA
X	13135011	13135730	FBgn0052639	CG32639-RA
X	13297941	13298386	FBgn0030484	CG1681-RA
X	13889927	13890435	FBgn0000173;FBgn0000173	ben-RA;ben-RB
X	14970129	14970730	FBgn0030608;FBgn0030608;FBgn0030608	Lsd-2-RB;Lsd-2-RC;Lsd-2-RA
X	16227080	16227381	FBgn0011764;FBgn0011764;FBgn0011764;FBgn0011764;FBgn0011764	Dsp1-RB;Dsp1-RA;Dsp1-RC;Dsp1-RD;Dsp1-RE
X	16253209	16253864	FBgn0086448	Gpi1-RA
X	16644847	16645362	FBgn0027528	CG9634-RA
X	16654920	16655875	FBgn0027528	CG9634-RA
X	17404289	17405108	FBgn0030842	CG8557-RB
X	17455790	17456391	FBgn0030844;FBgn0030844;FBgn0030844	ppk23-RA;ppk23-RB;ppk23-RC
X	17465061	17465410	FBgn0030844;FBgn0030844;FBgn0030844	ppk23-RA;ppk23-RB;ppk23-RC
X	17471985	17472386	FBgn0028343	l(1)G0222-RE
X	17576871	17577763	FBgn0052556	CG32556-RB
X	17723568	17724703	FBgn0030870	CG6398-RA
X	18156325	18156712	FBgn0030905	CG15059-RB
X	18669529	18669810	FBgn0030955	CG6891-RA
X	20109966	20110585	FBgn0031097	obst-A-RA
X	21152607	21153075	FBgn0052521;FBgn0052521;FBgn0052521	CG32521-RC;CG32521-RA;CG32521-RB
X	21221801	21222492	FBgn0003464	sol-RD
X	21502208	21502865	FBgn0024807	DIP1-RH

## Sheet: Gene Ontology
Gene Ontology (Flymine v. 26.0)
GO	Biological Process	p-value	FBIDs
GO:0048731	system development	4.00129e-26	FBgn0000042, FBgn0000054, FBgn0000097, FBgn0000157, FBgn0000173, FBgn0000244, FBgn0000497, FBgn0000504, FBgn0000546, FBgn0000575, FBgn0000636, FBgn0000723, FBgn0001168, FBgn0001235, FBgn0002543, FBgn0002945, FBgn0002973, FBgn0003118, FBgn0003129, FBgn0003165, FBgn0003175, FBgn0003177, FBgn0003302, FBgn0003371, FBgn0003396, FBgn0003464, FBgn0003502, FBgn0003716, FBgn0003862, FBgn0003866, FBgn00039…
GO:0007275	multicellular organismal development	1.07824e-23	FBgn0000042, FBgn0000054, FBgn0000097, FBgn0000157, FBgn0000173, FBgn0000244, FBgn0000283, FBgn0000497, FBgn0000504, FBgn0000546, FBgn0000575, FBgn0000636, FBgn0000723, FBgn0001168, FBgn0001235, FBgn0002543, FBgn0002945, FBgn0002973, FBgn0003118, FBgn0003129, FBgn0003165, FBgn0003175, FBgn0003177, FBgn0003302, FBgn0003371, FBgn0003396, FBgn0003464, FBgn0003502, FBgn0003716, FBgn0003862, FBgn00038…
GO:0007444	imaginal disc development	2.02833e-22	FBgn0000157, FBgn0000244, FBgn0000497, FBgn0000504, FBgn0000546, FBgn0000575, FBgn0001235, FBgn0003118, FBgn0003175, FBgn0003302, FBgn0003371, FBgn0003396, FBgn0003502, FBgn0003716, FBgn0003866, FBgn0003997, FBgn0004009, FBgn0004399, FBgn0004569, FBgn0004583, FBgn0004607, FBgn0004644, FBgn0004859, FBgn0004892, FBgn0004893, FBgn0005672, FBgn0005771, FBgn0010316, FBgn0010575, FBgn0010825, FBgn00112…
GO:0048856	anatomical structure development	4.54222e-22	FBgn0000042, FBgn0000054, FBgn0000097, FBgn0000157, FBgn0000173, FBgn0000244, FBgn0000497, FBgn0000504, FBgn0000546, FBgn0000575, FBgn0000636, FBgn0000723, FBgn0001168, FBgn0001235, FBgn0002543, FBgn0002945, FBgn0002973, FBgn0003118, FBgn0003129, FBgn0003165, FBgn0003175, FBgn0003177, FBgn0003302, FBgn0003371, FBgn0003396, FBgn0003464, FBgn0003502, FBgn0003716, FBgn0003862, FBgn0003866, FBgn00039…
GO:0009653	anatomical structure morphogenesis	3.3934e-21	FBgn0000042, FBgn0000054, FBgn0000097, FBgn0000157, FBgn0000173, FBgn0000244, FBgn0000497, FBgn0000504, FBgn0000546, FBgn0000575, FBgn0000636, FBgn0000723, FBgn0001168, FBgn0001235, FBgn0002543, FBgn0002945, FBgn0002973, FBgn0003118, FBgn0003165, FBgn0003175, FBgn0003177, FBgn0003302, FBgn0003371, FBgn0003396, FBgn0003502, FBgn0003716, FBgn0003862, FBgn0003866, FBgn0003997, FBgn0004009, FBgn00043…
GO:0009887	organ morphogenesis	1.5379e-20	FBgn0000097, FBgn0000157, FBgn0000244, FBgn0000497, FBgn0000504, FBgn0000546, FBgn0000575, FBgn0001168, FBgn0001235, FBgn0002543, FBgn0002945, FBgn0002973, FBgn0003118, FBgn0003175, FBgn0003302, FBgn0003371, FBgn0003396, FBgn0003716, FBgn0003866, FBgn0003997, FBgn0004009, FBgn0004399, FBgn0004569, FBgn0004583, FBgn0004607, FBgn0004644, FBgn0004859, FBgn0004892, FBgn0004893, FBgn0005672, FBgn00103…
GO:0048513	organ development	6.26851e-20	FBgn0000042, FBgn0000097, FBgn0000157, FBgn0000244, FBgn0000497, FBgn0000504, FBgn0000546, FBgn0000575, FBgn0001168, FBgn0001235, FBgn0002543, FBgn0002945, FBgn0002973, FBgn0003118, FBgn0003129, FBgn0003165, FBgn0003175, FBgn0003302, FBgn0003371, FBgn0003396, FBgn0003502, FBgn0003716, FBgn0003866, FBgn0003997, FBgn0004009, FBgn0004396, FBgn0004399, FBgn0004569, FBgn0004583, FBgn0004607, FBgn00046…
GO:0032502	developmental process	6.60438e-20	FBgn0000042, FBgn0000054, FBgn0000097, FBgn0000157, FBgn0000173, FBgn0000244, FBgn0000283, FBgn0000497, FBgn0000504, FBgn0000546, FBgn0000575, FBgn0000636, FBgn0000723, FBgn0001168, FBgn0001235, FBgn0002543, FBgn0002945, FBgn0002973, FBgn0003118, FBgn0003129, FBgn0003165, FBgn0003175, FBgn0003177, FBgn0003302, FBgn0003371, FBgn0003396, FBgn0003464, FBgn0003502, FBgn0003716, FBgn0003862, FBgn00038…
GO:0048569	post-embryonic organ development	8.39468e-20	FBgn0000244, FBgn0000497, FBgn0000504, FBgn0000546, FBgn0000575, FBgn0001235, FBgn0003118, FBgn0003129, FBgn0003175, FBgn0003302, FBgn0003371, FBgn0003396, FBgn0003716, FBgn0003866, FBgn0003997, FBgn0004009, FBgn0004399, FBgn0004569, FBgn0004607, FBgn0004644, FBgn0004892, FBgn0004893, FBgn0005672, FBgn0010316, FBgn0010575, FBgn0010825, FBgn0011224, FBgn0011591, FBgn0011661, FBgn0014141, FBgn00160…
GO:0048737	imaginal disc-derived appendage development	6.16364e-19	FBgn0000157, FBgn0000244, FBgn0000497, FBgn0000546, FBgn0000575, FBgn0001235, FBgn0003118, FBgn0003175, FBgn0003371, FBgn0003396, FBgn0003716, FBgn0003866, FBgn0003997, FBgn0004009, FBgn0004399, FBgn0004569, FBgn0004607, FBgn0004644, FBgn0004892, FBgn0004893, FBgn0005672, FBgn0010575, FBgn0010825, FBgn0011224, FBgn0011591, FBgn0016076, FBgn0016797, FBgn0017397, FBgn0023172, FBgn0028386, FBgn00299…
GO:0048736	appendage development	8.28918e-19	FBgn0000157, FBgn0000244, FBgn0000497, FBgn0000546, FBgn0000575, FBgn0001235, FBgn0003118, FBgn0003175, FBgn0003371, FBgn0003396, FBgn0003716, FBgn0003866, FBgn0003997, FBgn0004009, FBgn0004399, FBgn0004569, FBgn0004607, FBgn0004644, FBgn0004892, FBgn0004893, FBgn0005672, FBgn0010575, FBgn0010825, FBgn0011224, FBgn0011591, FBgn0016076, FBgn0016797, FBgn0017397, FBgn0023172, FBgn0028386, FBgn00299…
GO:0007560	imaginal disc morphogenesis	3.11832e-18	FBgn0000244, FBgn0000497, FBgn0000504, FBgn0000546, FBgn0000575, FBgn0001235, FBgn0003118, FBgn0003175, FBgn0003302, FBgn0003371, FBgn0003396, FBgn0003716, FBgn0003866, FBgn0003997, FBgn0004009, FBgn0004399, FBgn0004569, FBgn0004607, FBgn0004644, FBgn0004892, FBgn0004893, FBgn0005672, FBgn0010316, FBgn0010575, FBgn0010825, FBgn0011224, FBgn0011591, FBgn0011661, FBgn0016076, FBgn0016797, FBgn00173…
GO:0048563	post-embryonic organ morphogenesis	3.11832e-18	FBgn0000244, FBgn0000497, FBgn0000504, FBgn0000546, FBgn0000575, FBgn0001235, FBgn0003118, FBgn0003175, FBgn0003302, FBgn0003371, FBgn0003396, FBgn0003716, FBgn0003866, FBgn0003997, FBgn0004009, FBgn0004399, FBgn0004569, FBgn0004607, FBgn0004644, FBgn0004892, FBgn0004893, FBgn0005672, FBgn0010316, FBgn0010575, FBgn0010825, FBgn0011224, FBgn0011591, FBgn0011661, FBgn0016076, FBgn0016797, FBgn00173…
GO:0035114	imaginal disc-derived appendage morphogenesis	3.19811e-18	FBgn0000157, FBgn0000244, FBgn0000497, FBgn0000546, FBgn0000575, FBgn0001235, FBgn0003118, FBgn0003175, FBgn0003371, FBgn0003396, FBgn0003716, FBgn0003866, FBgn0003997, FBgn0004009, FBgn0004399, FBgn0004569, FBgn0004607, FBgn0004644, FBgn0004892, FBgn0004893, FBgn0005672, FBgn0010575, FBgn0010825, FBgn0011224, FBgn0011591, FBgn0016076, FBgn0016797, FBgn0017397, FBgn0023172, FBgn0028386, FBgn00299…
GO:0009791	post-embryonic development	3.37263e-18	FBgn0000244, FBgn0000497, FBgn0000504, FBgn0000546, FBgn0000575, FBgn0001235, FBgn0003118, FBgn0003129, FBgn0003175, FBgn0003302, FBgn0003371, FBgn0003396, FBgn0003716, FBgn0003866, FBgn0003997, FBgn0004009, FBgn0004396, FBgn0004399, FBgn0004569, FBgn0004607, FBgn0004644, FBgn0004861, FBgn0004865, FBgn0004892, FBgn0004893, FBgn0005672, FBgn0010316, FBgn0010575, FBgn0010825, FBgn0011224, FBgn00115…
GO:0035107	appendage morphogenesis	4.27955e-18	FBgn0000157, FBgn0000244, FBgn0000497, FBgn0000546, FBgn0000575, FBgn0001235, FBgn0003118, FBgn0003175, FBgn0003371, FBgn0003396, FBgn0003716, FBgn0003866, FBgn0003997, FBgn0004009, FBgn0004399, FBgn0004569, FBgn0004607, FBgn0004644, FBgn0004892, FBgn0004893, FBgn0005672, FBgn0010575, FBgn0010825, FBgn0011224, FBgn0011591, FBgn0016076, FBgn0016797, FBgn0017397, FBgn0023172, FBgn0028386, FBgn00299…
GO:0050789	regulation of biological process	7.29054e-18	FBgn0000054, FBgn0000097, FBgn0000157, FBgn0000173, FBgn0000504, FBgn0000546, FBgn0000575, FBgn0000721, FBgn0000723, FBgn0001168, FBgn0001235, FBgn0002543, FBgn0002945, FBgn0002973, FBgn0003118, FBgn0003129, FBgn0003165, FBgn0003177, FBgn0003302, FBgn0003371, FBgn0003390, FBgn0003396, FBgn0003502, FBgn0003716, FBgn0003862, FBgn0003866, FBgn0003997, FBgn0004009, FBgn0004396, FBgn0004399, FBgn00045…
GO:0065007	biological regulation	4.21628e-17	FBgn0000042, FBgn0000054, FBgn0000097, FBgn0000157, FBgn0000173, FBgn0000244, FBgn0000497, FBgn0000504, FBgn0000546, FBgn0000575, FBgn0000667, FBgn0000721, FBgn0000723, FBgn0001168, FBgn0001235, FBgn0002543, FBgn0002945, FBgn0002973, FBgn0003118, FBgn0003129, FBgn0003165, FBgn0003177, FBgn0003302, FBgn0003371, FBgn0003390, FBgn0003396, FBgn0003502, FBgn0003716, FBgn0003862, FBgn0003866, FBgn00039…
GO:0035120	post-embryonic appendage morphogenesis	5.39285e-17	FBgn0000244, FBgn0000497, FBgn0000546, FBgn0000575, FBgn0001235, FBgn0003118, FBgn0003175, FBgn0003371, FBgn0003396, FBgn0003716, FBgn0003866, FBgn0004009, FBgn0004399, FBgn0004569, FBgn0004607, FBgn0004644, FBgn0004892, FBgn0004893, FBgn0005672, FBgn0010575, FBgn0010825, FBgn0011224, FBgn0011591, FBgn0016076, FBgn0016797, FBgn0017397, FBgn0023172, FBgn0028386, FBgn0029944, FBgn0035142, FBgn00365…
GO:0035220	wing disc development	6.40606e-17	FBgn0000244, FBgn0000497, FBgn0000546, FBgn0000575, FBgn0001235, FBgn0003118, FBgn0003175, FBgn0003371, FBgn0003396, FBgn0003716, FBgn0003866, FBgn0004009, FBgn0004399, FBgn0004569, FBgn0004607, FBgn0004644, FBgn0004859, FBgn0004893, FBgn0005672, FBgn0010575, FBgn0010825, FBgn0011224, FBgn0011591, FBgn0016076, FBgn0016797, FBgn0017397, FBgn0023172, FBgn0028386, FBgn0029944, FBgn0035142, FBgn00365…
GO:0048707	instar larval or pupal morphogenesis	7.72994e-17	FBgn0000244, FBgn0000497, FBgn0000504, FBgn0000546, FBgn0000575, FBgn0001235, FBgn0003118, FBgn0003175, FBgn0003302, FBgn0003371, FBgn0003396, FBgn0003716, FBgn0003866, FBgn0003997, FBgn0004009, FBgn0004399, FBgn0004569, FBgn0004607, FBgn0004644, FBgn0004892, FBgn0004893, FBgn0005672, FBgn0010316, FBgn0010575, FBgn0010825, FBgn0011224, FBgn0011591, FBgn0011661, FBgn0016076, FBgn0016797, FBgn00173…
GO:0002165	instar larval or pupal development	8.02529e-17	FBgn0000244, FBgn0000497, FBgn0000504, FBgn0000546, FBgn0000575, FBgn0001235, FBgn0003118, FBgn0003175, FBgn0003302, FBgn0003371, FBgn0003396, FBgn0003716, FBgn0003866, FBgn0003997, FBgn0004009, FBgn0004396, FBgn0004399, FBgn0004569, FBgn0004607, FBgn0004644, FBgn0004861, FBgn0004865, FBgn0004892, FBgn0004893, FBgn0005672, FBgn0010316, FBgn0010575, FBgn0010825, FBgn0011224, FBgn0011591, FBgn00116…
GO:0032501	multicellular organismal process	1.76897e-16	FBgn0000042, FBgn0000054, FBgn0000097, FBgn0000157, FBgn0000173, FBgn0000244, FBgn0000283, FBgn0000497, FBgn0000504, FBgn0000546, FBgn0000575, FBgn0000636, FBgn0000667, FBgn0000721, FBgn0000723, FBgn0001168, FBgn0001235, FBgn0002543, FBgn0002945, FBgn0002973, FBgn0003118, FBgn0003129, FBgn0003165, FBgn0003175, FBgn0003177, FBgn0003302, FBgn0003371, FBgn0003396, FBgn0003464, FBgn0003502, FBgn00037…
GO:0009886	post-embryonic morphogenesis	1.95929e-16	FBgn0000244, FBgn0000497, FBgn0000504, FBgn0000546, FBgn0000575, FBgn0001235, FBgn0003118, FBgn0003175, FBgn0003302, FBgn0003371, FBgn0003396, FBgn0003716, FBgn0003866, FBgn0003997, FBgn0004009, FBgn0004399, FBgn0004569, FBgn0004607, FBgn0004644, FBgn0004892, FBgn0004893, FBgn0005672, FBgn0010316, FBgn0010575, FBgn0010825, FBgn0011224, FBgn0011591, FBgn0011661, FBgn0016076, FBgn0016797, FBgn00173…
GO:0007476	imaginal disc-derived wing morphogenesis	4.36407e-16	FBgn0000244, FBgn0000497, FBgn0000546, FBgn0000575, FBgn0001235, FBgn0003118, FBgn0003175, FBgn0003371, FBgn0003396, FBgn0003716, FBgn0003866, FBgn0004009, FBgn0004399, FBgn0004569, FBgn0004607, FBgn0004644, FBgn0005672, FBgn0010575, FBgn0010825, FBgn0011224, FBgn0011591, FBgn0016076, FBgn0016797, FBgn0017397, FBgn0023172, FBgn0028386, FBgn0029944, FBgn0035142, FBgn0036558, FBgn0041184, FBgn00416…
GO:0007552	metamorphosis	4.81818e-16	FBgn0000244, FBgn0000497, FBgn0000504, FBgn0000546, FBgn0000575, FBgn0001235, FBgn0003118, FBgn0003175, FBgn0003302, FBgn0003371, FBgn0003396, FBgn0003716, FBgn0003866, FBgn0003997, FBgn0004009, FBgn0004399, FBgn0004569, FBgn0004607, FBgn0004644, FBgn0004892, FBgn0004893, FBgn0005672, FBgn0010316, FBgn0010575, FBgn0010825, FBgn0011224, FBgn0011591, FBgn0011661, FBgn0016076, FBgn0016797, FBgn00173…
GO:0007472	wing disc morphogenesis	5.03879e-16	FBgn0000244, FBgn0000497, FBgn0000546, FBgn0000575, FBgn0001235, FBgn0003118, FBgn0003175, FBgn0003371, FBgn0003396, FBgn0003716, FBgn0003866, FBgn0004009, FBgn0004399, FBgn0004569, FBgn0004607, FBgn0004644, FBgn0005672, FBgn0010575, FBgn0010825, FBgn0011224, FBgn0011591, FBgn0016076, FBgn0016797, FBgn0017397, FBgn0023172, FBgn0028386, FBgn0029944, FBgn0035142, FBgn0036558, FBgn0041184, FBgn00416…
GO:0050794	regulation of cellular process	5.8917e-16	FBgn0000054, FBgn0000097, FBgn0000157, FBgn0000504, FBgn0000546, FBgn0000575, FBgn0001168, FBgn0001235, FBgn0002543, FBgn0002973, FBgn0003118, FBgn0003129, FBgn0003165, FBgn0003177, FBgn0003302, FBgn0003371, FBgn0003396, FBgn0003502, FBgn0003716, FBgn0003862, FBgn0003866, FBgn0003997, FBgn0004009, FBgn0004396, FBgn0004569, FBgn0004583, FBgn0004607, FBgn0004644, FBgn0004646, FBgn0004859, FBgn00048…
GO:0007389	pattern specification process	1.50049e-15	FBgn0000157, FBgn0000497, FBgn0000546, FBgn0001168, FBgn0001235, FBgn0002543, FBgn0002945, FBgn0002973, FBgn0003118, FBgn0003165, FBgn0003371, FBgn0003396, FBgn0003716, FBgn0003866, FBgn0004009, FBgn0004396, FBgn0004399, FBgn0004400, FBgn0004569, FBgn0004644, FBgn0004859, FBgn0004892, FBgn0004893, FBgn0005672, FBgn0010300, FBgn0010575, FBgn0010825, FBgn0011224, FBgn0011591, FBgn0011661, FBgn00117…
GO:0007399	nervous system development	6.38507e-15	FBgn0000042, FBgn0000054, FBgn0000097, FBgn0000173, FBgn0000504, FBgn0000546, FBgn0000575, FBgn0000636, FBgn0000723, FBgn0001168, FBgn0001235, FBgn0002543, FBgn0002945, FBgn0002973, FBgn0003118, FBgn0003165, FBgn0003371, FBgn0003396, FBgn0003464, FBgn0003716, FBgn0003862, FBgn0004009, FBgn0004370, FBgn0004569, FBgn0004583, FBgn0004607, FBgn0004644, FBgn0004646, FBgn0004652, FBgn0004859, FBgn00048…
GO:0003002	regionalization	1.59961e-14	FBgn0000157, FBgn0000497, FBgn0000546, FBgn0001168, FBgn0001235, FBgn0002543, FBgn0002945, FBgn0002973, FBgn0003118, FBgn0003165, FBgn0003371, FBgn0003396, FBgn0003716, FBgn0003866, FBgn0004009, FBgn0004396, FBgn0004399, FBgn0004400, FBgn0004569, FBgn0004644, FBgn0004859, FBgn0004892, FBgn0004893, FBgn0005672, FBgn0010300, FBgn0010575, FBgn0010825, FBgn0011591, FBgn0011661, FBgn0011764, FBgn00166…
GO:0060255	regulation of macromolecule metabolic process	2.6286e-14	FBgn0000054, FBgn0000097, FBgn0000157, FBgn0000173, FBgn0000504, FBgn0000546, FBgn0000575, FBgn0001168, FBgn0001235, FBgn0003118, FBgn0003129, FBgn0003165, FBgn0003371, FBgn0003390, FBgn0003396, FBgn0003862, FBgn0003866, FBgn0003997, FBgn0004009, FBgn0004396, FBgn0004399, FBgn0004607, FBgn0004644, FBgn0004859, FBgn0004860, FBgn0004861, FBgn0004865, FBgn0004892, FBgn0004914, FBgn0005612, FBgn00057…
GO:0045449	regulation of transcription	3.88971e-14	FBgn0000054, FBgn0000097, FBgn0000157, FBgn0000504, FBgn0000546, FBgn0000575, FBgn0001168, FBgn0001235, FBgn0003118, FBgn0003129, FBgn0003165, FBgn0003371, FBgn0003396, FBgn0003862, FBgn0003866, FBgn0004009, FBgn0004396, FBgn0004607, FBgn0004644, FBgn0004859, FBgn0004860, FBgn0004861, FBgn0004865, FBgn0004892, FBgn0004914, FBgn0005612, FBgn0005771, FBgn0010313, FBgn0010575, FBgn0010825, FBgn00117…
GO:0007423	sensory organ development	4.01277e-14	FBgn0000097, FBgn0000497, FBgn0000504, FBgn0000575, FBgn0001168, FBgn0001235, FBgn0002973, FBgn0003118, FBgn0003302, FBgn0003371, FBgn0003396, FBgn0003716, FBgn0003866, FBgn0003997, FBgn0004009, FBgn0004569, FBgn0004583, FBgn0004644, FBgn0004859, FBgn0005672, FBgn0010316, FBgn0010825, FBgn0011591, FBgn0011661, FBgn0015371, FBgn0015609, FBgn0016076, FBgn0016797, FBgn0020496, FBgn0023214, FBgn00283…
GO:0010468	regulation of gene expression	4.26581e-14	FBgn0000054, FBgn0000097, FBgn0000157, FBgn0000504, FBgn0000546, FBgn0000575, FBgn0001168, FBgn0001235, FBgn0003118, FBgn0003129, FBgn0003165, FBgn0003371, FBgn0003390, FBgn0003396, FBgn0003862, FBgn0003866, FBgn0004009, FBgn0004396, FBgn0004399, FBgn0004607, FBgn0004644, FBgn0004859, FBgn0004860, FBgn0004861, FBgn0004865, FBgn0004892, FBgn0004914, FBgn0005612, FBgn0005771, FBgn0010113, FBgn00103…
GO:0009790	embryo development	1.05617e-13	FBgn0000097, FBgn0000283, FBgn0000546, FBgn0000575, FBgn0000723, FBgn0001168, FBgn0001235, FBgn0002543, FBgn0002945, FBgn0003118, FBgn0003165, FBgn0003177, FBgn0003371, FBgn0003396, FBgn0003502, FBgn0003716, FBgn0003866, FBgn0003997, FBgn0004009, FBgn0004399, FBgn0004644, FBgn0004859, FBgn0004860, FBgn0004861, FBgn0010825, FBgn0011661, FBgn0015371, FBgn0016660, FBgn0017397, FBgn0020496, FBgn00231…
GO:0030154	cell differentiation	1.7222e-13	FBgn0000042, FBgn0000054, FBgn0000097, FBgn0000173, FBgn0000497, FBgn0000504, FBgn0000546, FBgn0000575, FBgn0000636, FBgn0000723, FBgn0001168, FBgn0001235, FBgn0002543, FBgn0002945, FBgn0002973, FBgn0003118, FBgn0003165, FBgn0003177, FBgn0003371, FBgn0003716, FBgn0003862, FBgn0003997, FBgn0004009, FBgn0004370, FBgn0004399, FBgn0004400, FBgn0004569, FBgn0004583, FBgn0004644, FBgn0004652, FBgn00048…
GO:0022008	neurogenesis	1.73711e-13	FBgn0000054, FBgn0000097, FBgn0000173, FBgn0000504, FBgn0000546, FBgn0000575, FBgn0000636, FBgn0000723, FBgn0001168, FBgn0001235, FBgn0002543, FBgn0002945, FBgn0002973, FBgn0003118, FBgn0003165, FBgn0003862, FBgn0004009, FBgn0004370, FBgn0004569, FBgn0004583, FBgn0004644, FBgn0004652, FBgn0004859, FBgn0004861, FBgn0005612, FBgn0005672, FBgn0010113, FBgn0010300, FBgn0010415, FBgn0010575, FBgn00116…
GO:0010556	regulation of macromolecule biosynthetic process	2.09634e-13	FBgn0000054, FBgn0000097, FBgn0000157, FBgn0000504, FBgn0000546, FBgn0000575, FBgn0001168, FBgn0001235, FBgn0003118, FBgn0003129, FBgn0003165, FBgn0003371, FBgn0003396, FBgn0003862, FBgn0003866, FBgn0004009, FBgn0004396, FBgn0004607, FBgn0004644, FBgn0004859, FBgn0004860, FBgn0004861, FBgn0004865, FBgn0004892, FBgn0004914, FBgn0005612, FBgn0005771, FBgn0010300, FBgn0010313, FBgn0010575, FBgn00108…
GO:2000112	regulation of cellular macromolecule biosynthetic process	2.09634e-13	FBgn0000054, FBgn0000097, FBgn0000157, FBgn0000504, FBgn0000546, FBgn0000575, FBgn0001168, FBgn0001235, FBgn0003118, FBgn0003129, FBgn0003165, FBgn0003371, FBgn0003396, FBgn0003862, FBgn0003866, FBgn0004009, FBgn0004396, FBgn0004607, FBgn0004644, FBgn0004859, FBgn0004860, FBgn0004861, FBgn0004865, FBgn0004892, FBgn0004914, FBgn0005612, FBgn0005771, FBgn0010300, FBgn0010313, FBgn0010575, FBgn00108…
GO:0048869	cellular developmental process	2.96592e-13	FBgn0000042, FBgn0000054, FBgn0000097, FBgn0000173, FBgn0000497, FBgn0000504, FBgn0000546, FBgn0000575, FBgn0000636, FBgn0000723, FBgn0001168, FBgn0001235, FBgn0002543, FBgn0002945, FBgn0002973, FBgn0003118, FBgn0003165, FBgn0003177, FBgn0003371, FBgn0003716, FBgn0003862, FBgn0003997, FBgn0004009, FBgn0004370, FBgn0004399, FBgn0004400, FBgn0004569, FBgn0004583, FBgn0004644, FBgn0004652, FBgn00048…
GO:0048699	generation of neurons	5.21307e-13	FBgn0000054, FBgn0000097, FBgn0000173, FBgn0000504, FBgn0000546, FBgn0000575, FBgn0000636, FBgn0000723, FBgn0001168, FBgn0001235, FBgn0002543, FBgn0002945, FBgn0002973, FBgn0003118, FBgn0003165, FBgn0003862, FBgn0004009, FBgn0004370, FBgn0004569, FBgn0004583, FBgn0004644, FBgn0004652, FBgn0004859, FBgn0004861, FBgn0005612, FBgn0005672, FBgn0010113, FBgn0010300, FBgn0010415, FBgn0010575, FBgn00116…
GO:0006350	transcription	6.52958e-13	FBgn0000054, FBgn0000097, FBgn0000157, FBgn0000504, FBgn0000546, FBgn0000575, FBgn0001168, FBgn0001235, FBgn0003118, FBgn0003129, FBgn0003165, FBgn0003371, FBgn0003396, FBgn0003862, FBgn0003866, FBgn0004009, FBgn0004396, FBgn0004607, FBgn0004644, FBgn0004859, FBgn0004860, FBgn0004861, FBgn0004865, FBgn0004892, FBgn0004914, FBgn0005612, FBgn0005771, FBgn0010300, FBgn0010313, FBgn0010575, FBgn00108…
GO:0050793	regulation of developmental process	6.84509e-13	FBgn0000097, FBgn0000504, FBgn0000546, FBgn0000723, FBgn0002945, FBgn0002973, FBgn0003118, FBgn0003165, FBgn0003371, FBgn0003396, FBgn0003716, FBgn0003866, FBgn0003997, FBgn0004009, FBgn0004569, FBgn0004583, FBgn0004859, FBgn0005672, FBgn0010113, FBgn0010300, FBgn0010575, FBgn0014141, FBgn0015371, FBgn0015609, FBgn0016660, FBgn0023172, FBgn0025641, FBgn0028369, FBgn0029944, FBgn0033378, FBgn00411…
GO:0019222	regulation of metabolic process	7.52959e-13	FBgn0000054, FBgn0000097, FBgn0000157, FBgn0000173, FBgn0000504, FBgn0000546, FBgn0000575, FBgn0001168, FBgn0001235, FBgn0003118, FBgn0003129, FBgn0003165, FBgn0003371, FBgn0003390, FBgn0003396, FBgn0003862, FBgn0003866, FBgn0003997, FBgn0004009, FBgn0004396, FBgn0004399, FBgn0004583, FBgn0004607, FBgn0004644, FBgn0004859, FBgn0004860, FBgn0004861, FBgn0004865, FBgn0004892, FBgn0004914, FBgn00056…
GO:0009889	regulation of biosynthetic process	1.34876e-12	FBgn0000054, FBgn0000097, FBgn0000157, FBgn0000504, FBgn0000546, FBgn0000575, FBgn0001168, FBgn0001235, FBgn0003118, FBgn0003129, FBgn0003165, FBgn0003371, FBgn0003396, FBgn0003862, FBgn0003866, FBgn0004009, FBgn0004396, FBgn0004607, FBgn0004644, FBgn0004859, FBgn0004860, FBgn0004861, FBgn0004865, FBgn0004892, FBgn0004914, FBgn0005612, FBgn0005771, FBgn0010300, FBgn0010313, FBgn0010575, FBgn00108…
GO:0031326	regulation of cellular biosynthetic process	1.34876e-12	FBgn0000054, FBgn0000097, FBgn0000157, FBgn0000504, FBgn0000546, FBgn0000575, FBgn0001168, FBgn0001235, FBgn0003118, FBgn0003129, FBgn0003165, FBgn0003371, FBgn0003396, FBgn0003862, FBgn0003866, FBgn0004009, FBgn0004396, FBgn0004607, FBgn0004644, FBgn0004859, FBgn0004860, FBgn0004861, FBgn0004865, FBgn0004892, FBgn0004914, FBgn0005612, FBgn0005771, FBgn0010300, FBgn0010313, FBgn0010575, FBgn00108…
GO:2000026	regulation of multicellular organismal development	1.7334e-12	FBgn0000097, FBgn0000504, FBgn0000723, FBgn0002945, FBgn0002973, FBgn0003118, FBgn0003165, FBgn0003371, FBgn0003396, FBgn0003716, FBgn0003866, FBgn0003997, FBgn0004009, FBgn0004583, FBgn0004859, FBgn0005672, FBgn0010113, FBgn0010300, FBgn0010575, FBgn0014141, FBgn0015371, FBgn0015609, FBgn0023172, FBgn0025641, FBgn0028369, FBgn0029944, FBgn0033378, FBgn0041184, FBgn0041604, FBgn0261278
GO:0080090	regulation of primary metabolic process	2.63008e-12	FBgn0000054, FBgn0000097, FBgn0000157, FBgn0000173, FBgn0000504, FBgn0000546, FBgn0000575, FBgn0001168, FBgn0001235, FBgn0003118, FBgn0003129, FBgn0003165, FBgn0003371, FBgn0003396, FBgn0003862, FBgn0003866, FBgn0003997, FBgn0004009, FBgn0004396, FBgn0004607, FBgn0004644, FBgn0004859, FBgn0004860, FBgn0004861, FBgn0004865, FBgn0004892, FBgn0004914, FBgn0005612, FBgn0005771, FBgn0010300, FBgn00103…
GO:0030182	neuron differentiation	3.66721e-12	FBgn0000054, FBgn0000097, FBgn0000173, FBgn0000504, FBgn0000546, FBgn0000575, FBgn0000636, FBgn0000723, FBgn0001168, FBgn0001235, FBgn0002543, FBgn0003118, FBgn0003165, FBgn0003862, FBgn0004370, FBgn0004569, FBgn0004583, FBgn0004644, FBgn0004652, FBgn0004859, FBgn0004861, FBgn0005612, FBgn0005672, FBgn0010113, FBgn0010300, FBgn0010415, FBgn0010575, FBgn0011661, FBgn0011766, FBgn0015609, FBgn00167…
GO:0007610	behavior	3.8837e-12	FBgn0000042, FBgn0000054, FBgn0000173, FBgn0000504, FBgn0000546, FBgn0000575, FBgn0000636, FBgn0000667, FBgn0000721, FBgn0002973, FBgn0003165, FBgn0003175, FBgn0003371, FBgn0003396, FBgn0003464, FBgn0003502, FBgn0004399, FBgn0004646, FBgn0004652, FBgn0005672, FBgn0005771, FBgn0010470, FBgn0010575, FBgn0011661, FBgn0014141, FBgn0015609, FBgn0016076, FBgn0016930, FBgn0030844, FBgn0031453, FBgn00330…
GO:0006355	regulation of transcription, DNA-dependent	3.88767e-12	FBgn0000054, FBgn0000097, FBgn0000157, FBgn0000504, FBgn0000546, FBgn0000575, FBgn0001168, FBgn0001235, FBgn0003118, FBgn0003165, FBgn0003371, FBgn0003396, FBgn0003862, FBgn0003866, FBgn0004396, FBgn0004607, FBgn0004644, FBgn0004859, FBgn0004860, FBgn0004861, FBgn0004865, FBgn0004914, FBgn0005771, FBgn0010313, FBgn0010575, FBgn0011764, FBgn0011766, FBgn0015371, FBgn0016076, FBgn0016660, FBgn00204…
GO:0019219	regulation of nucleobase, nucleoside, nucleotide and nucleic acid metabolic process	4.68344e-12	FBgn0000054, FBgn0000097, FBgn0000157, FBgn0000504, FBgn0000546, FBgn0000575, FBgn0001168, FBgn0001235, FBgn0003118, FBgn0003129, FBgn0003165, FBgn0003371, FBgn0003396, FBgn0003862, FBgn0003866, FBgn0004009, FBgn0004396, FBgn0004607, FBgn0004644, FBgn0004859, FBgn0004860, FBgn0004861, FBgn0004865, FBgn0004892, FBgn0004914, FBgn0005612, FBgn0005771, FBgn0010313, FBgn0010575, FBgn0010825, FBgn00117…
GO:0051171	regulation of nitrogen compound metabolic process	5.18407e-12	FBgn0000054, FBgn0000097, FBgn0000157, FBgn0000504, FBgn0000546, FBgn0000575, FBgn0001168, FBgn0001235, FBgn0003118, FBgn0003129, FBgn0003165, FBgn0003371, FBgn0003396, FBgn0003862, FBgn0003866, FBgn0004009, FBgn0004396, FBgn0004607, FBgn0004644, FBgn0004859, FBgn0004860, FBgn0004861, FBgn0004865, FBgn0004892, FBgn0004914, FBgn0005612, FBgn0005771, FBgn0010313, FBgn0010575, FBgn0010825, FBgn00117…
GO:0000902	cell morphogenesis	1.08899e-11	FBgn0000054, FBgn0000097, FBgn0000173, FBgn0000497, FBgn0000504, FBgn0000546, FBgn0000636, FBgn0000723, FBgn0001168, FBgn0002543, FBgn0003165, FBgn0003716, FBgn0003862, FBgn0004009, FBgn0004370, FBgn0004569, FBgn0004644, FBgn0004652, FBgn0004859, FBgn0004861, FBgn0005612, FBgn0010113, FBgn0010300, FBgn0010415, FBgn0010575, FBgn0011766, FBgn0015609, FBgn0016797, FBgn0023172, FBgn0025641, FBgn00299…
GO:0007447	imaginal disc pattern formation	1.43913e-11	FBgn0000157, FBgn0000497, FBgn0001235, FBgn0003118, FBgn0003396, FBgn0003716, FBgn0003866, FBgn0004009, FBgn0004644, FBgn0004859, FBgn0010575, FBgn0011591, FBgn0016660, FBgn0028386, FBgn0037021, FBgn0041604, FBgn0043364, FBgn0086655, FBgn0261458
GO:0001654	eye development	2.02119e-11	FBgn0000097, FBgn0000497, FBgn0000575, FBgn0001168, FBgn0001235, FBgn0003118, FBgn0003302, FBgn0003396, FBgn0003716, FBgn0003866, FBgn0003997, FBgn0004009, FBgn0004569, FBgn0004583, FBgn0004644, FBgn0004859, FBgn0005672, FBgn0010825, FBgn0011591, FBgn0011661, FBgn0015371, FBgn0015609, FBgn0028369, FBgn0028386, FBgn0035142, FBgn0036558, FBgn0041184, FBgn0041604, FBgn0043364, FBgn0259176, FBgn02614…
GO:0007424	open tracheal system development	4.01566e-11	FBgn0000497, FBgn0001168, FBgn0002543, FBgn0003118, FBgn0003177, FBgn0003502, FBgn0003716, FBgn0003997, FBgn0004009, FBgn0004370, FBgn0004644, FBgn0004859, FBgn0005672, FBgn0005771, FBgn0010113, FBgn0010316, FBgn0015296, FBgn0023172, FBgn0025641, FBgn0038755, FBgn0039411, FBgn0086655, FBgn0086680, FBgn0261284
GO:0048519	negative regulation of biological process	4.39614e-11	FBgn0000097, FBgn0000504, FBgn0000546, FBgn0000575, FBgn0001168, FBgn0002973, FBgn0003118, FBgn0003165, FBgn0003371, FBgn0003396, FBgn0003716, FBgn0003866, FBgn0004009, FBgn0004399, FBgn0004569, FBgn0004583, FBgn0004859, FBgn0004860, FBgn0004861, FBgn0005672, FBgn0010113, FBgn0010300, FBgn0010313, FBgn0010316, FBgn0010575, FBgn0010825, FBgn0011224, FBgn0011591, FBgn0011764, FBgn0011837, FBgn00141…
GO:0060541	respiratory system development	4.53969e-11	FBgn0000497, FBgn0001168, FBgn0002543, FBgn0003118, FBgn0003177, FBgn0003502, FBgn0003716, FBgn0003997, FBgn0004009, FBgn0004370, FBgn0004644, FBgn0004859, FBgn0005672, FBgn0005771, FBgn0010113, FBgn0010316, FBgn0015296, FBgn0023172, FBgn0025641, FBgn0038755, FBgn0039411, FBgn0086655, FBgn0086680, FBgn0261284
GO:0051252	regulation of RNA metabolic process	5.5215e-11	FBgn0000054, FBgn0000097, FBgn0000157, FBgn0000504, FBgn0000546, FBgn0000575, FBgn0001168, FBgn0001235, FBgn0003118, FBgn0003165, FBgn0003371, FBgn0003396, FBgn0003862, FBgn0003866, FBgn0004396, FBgn0004607, FBgn0004644, FBgn0004859, FBgn0004860, FBgn0004861, FBgn0004865, FBgn0004914, FBgn0005771, FBgn0010313, FBgn0010575, FBgn0011764, FBgn0011766, FBgn0015371, FBgn0016076, FBgn0016660, FBgn00173…
GO:0006351	transcription, DNA-dependent	5.84501e-11	FBgn0000054, FBgn0000097, FBgn0000157, FBgn0000504, FBgn0000546, FBgn0000575, FBgn0001168, FBgn0001235, FBgn0003118, FBgn0003165, FBgn0003371, FBgn0003396, FBgn0003862, FBgn0003866, FBgn0004396, FBgn0004607, FBgn0004644, FBgn0004859, FBgn0004860, FBgn0004861, FBgn0004865, FBgn0004914, FBgn0005771, FBgn0010300, FBgn0010313, FBgn0010575, FBgn0011764, FBgn0011766, FBgn0015371, FBgn0016076, FBgn00166…
GO:0048523	negative regulation of cellular process	5.85009e-11	FBgn0000097, FBgn0000504, FBgn0000546, FBgn0000575, FBgn0001168, FBgn0002973, FBgn0003118, FBgn0003165, FBgn0003371, FBgn0003396, FBgn0003716, FBgn0003866, FBgn0004009, FBgn0004569, FBgn0004583, FBgn0004859, FBgn0004860, FBgn0004861, FBgn0005672, FBgn0010113, FBgn0010300, FBgn0010313, FBgn0010316, FBgn0010575, FBgn0010825, FBgn0011224, FBgn0011591, FBgn0011764, FBgn0014141, FBgn0015371, FBgn00156…
GO:0032774	RNA biosynthetic process	6.54735e-11	FBgn0000054, FBgn0000097, FBgn0000157, FBgn0000504, FBgn0000546, FBgn0000575, FBgn0001168, FBgn0001235, FBgn0003118, FBgn0003165, FBgn0003371, FBgn0003396, FBgn0003862, FBgn0003866, FBgn0004396, FBgn0004607, FBgn0004644, FBgn0004859, FBgn0004860, FBgn0004861, FBgn0004865, FBgn0004914, FBgn0005771, FBgn0010300, FBgn0010313, FBgn0010575, FBgn0011764, FBgn0011766, FBgn0015371, FBgn0016076, FBgn00166…
GO:0032989	cellular component morphogenesis	1.15995e-10	FBgn0000054, FBgn0000097, FBgn0000173, FBgn0000497, FBgn0000504, FBgn0000546, FBgn0000636, FBgn0000723, FBgn0001168, FBgn0002543, FBgn0003165, FBgn0003716, FBgn0003862, FBgn0004009, FBgn0004370, FBgn0004569, FBgn0004644, FBgn0004652, FBgn0004859, FBgn0004861, FBgn0005612, FBgn0010113, FBgn0010300, FBgn0010415, FBgn0010575, FBgn0011766, FBgn0015609, FBgn0016797, FBgn0023172, FBgn0025641, FBgn00283…
GO:0009888	tissue development	1.49026e-10	FBgn0000097, FBgn0000497, FBgn0000546, FBgn0000575, FBgn0000723, FBgn0002945, FBgn0003118, FBgn0003165, FBgn0003177, FBgn0003371, FBgn0003396, FBgn0003502, FBgn0003716, FBgn0003866, FBgn0003997, FBgn0004009, FBgn0004569, FBgn0004644, FBgn0004859, FBgn0004861, FBgn0004914, FBgn0010113, FBgn0011661, FBgn0011766, FBgn0014141, FBgn0015609, FBgn0016076, FBgn0017397, FBgn0023172, FBgn0028369, FBgn00299…
GO:0048468	cell development	1.74913e-10	FBgn0000042, FBgn0000054, FBgn0000097, FBgn0000173, FBgn0000497, FBgn0000504, FBgn0000546, FBgn0000575, FBgn0000636, FBgn0000723, FBgn0002543, FBgn0002973, FBgn0003118, FBgn0003165, FBgn0003371, FBgn0003716, FBgn0003862, FBgn0003997, FBgn0004009, FBgn0004370, FBgn0004399, FBgn0004400, FBgn0004569, FBgn0004644, FBgn0004652, FBgn0004859, FBgn0004861, FBgn0005612, FBgn0005672, FBgn0010113, FBgn00103…
GO:0048666	neuron development	2.09602e-10	FBgn0000054, FBgn0000097, FBgn0000173, FBgn0000504, FBgn0000546, FBgn0000636, FBgn0000723, FBgn0002543, FBgn0003118, FBgn0003165, FBgn0003862, FBgn0004370, FBgn0004569, FBgn0004644, FBgn0004652, FBgn0004859, FBgn0004861, FBgn0005612, FBgn0005672, FBgn0010113, FBgn0010300, FBgn0010415, FBgn0010575, FBgn0011661, FBgn0011766, FBgn0015609, FBgn0016797, FBgn0023172, FBgn0023214, FBgn0025641, FBgn00361…
GO:0051239	regulation of multicellular organismal process	2.13696e-10	FBgn0000097, FBgn0000504, FBgn0000721, FBgn0000723, FBgn0002945, FBgn0002973, FBgn0003118, FBgn0003165, FBgn0003371, FBgn0003396, FBgn0003716, FBgn0003866, FBgn0003997, FBgn0004009, FBgn0004583, FBgn0004859, FBgn0005672, FBgn0010113, FBgn0010300, FBgn0010575, FBgn0011766, FBgn0014141, FBgn0015371, FBgn0015609, FBgn0023172, FBgn0025641, FBgn0028369, FBgn0029944, FBgn0033378, FBgn0039141, FBgn00411…
GO:0000904	cell morphogenesis involved in differentiation	2.88002e-10	FBgn0000054, FBgn0000097, FBgn0000173, FBgn0000497, FBgn0000504, FBgn0000546, FBgn0000636, FBgn0000723, FBgn0002543, FBgn0003165, FBgn0003862, FBgn0004370, FBgn0004569, FBgn0004644, FBgn0004652, FBgn0004859, FBgn0004861, FBgn0005612, FBgn0010113, FBgn0010300, FBgn0010415, FBgn0010575, FBgn0011766, FBgn0015609, FBgn0016797, FBgn0023172, FBgn0025641, FBgn0036101, FBgn0041171, FBgn0041604, FBgn00866…
GO:0031323	regulation of cellular metabolic process	2.88687e-10	FBgn0000054, FBgn0000097, FBgn0000157, FBgn0000504, FBgn0000546, FBgn0000575, FBgn0001168, FBgn0001235, FBgn0003118, FBgn0003129, FBgn0003165, FBgn0003371, FBgn0003396, FBgn0003862, FBgn0003866, FBgn0004009, FBgn0004396, FBgn0004583, FBgn0004607, FBgn0004644, FBgn0004859, FBgn0004860, FBgn0004861, FBgn0004865, FBgn0004892, FBgn0004914, FBgn0005612, FBgn0005771, FBgn0010300, FBgn0010313, FBgn00103…
GO:0035222	wing disc pattern formation	3.23069e-10	FBgn0000497, FBgn0003118, FBgn0003396, FBgn0003716, FBgn0003866, FBgn0004009, FBgn0004644, FBgn0004859, FBgn0010575, FBgn0011591, FBgn0028386, FBgn0037021, FBgn0041604, FBgn0043364, FBgn0261458
GO:0001700	embryonic development via the syncytial blastoderm	5.529e-10	FBgn0000097, FBgn0000283, FBgn0000546, FBgn0000575, FBgn0000723, FBgn0003165, FBgn0003177, FBgn0003396, FBgn0003502, FBgn0003716, FBgn0003866, FBgn0003997, FBgn0004009, FBgn0015371, FBgn0020496, FBgn0023172, FBgn0028369, FBgn0028386, FBgn0029944, FBgn0043364, FBgn0250876, FBgn0261278
GO:0009792	embryo development ending in birth or egg hatching	9.79397e-10	FBgn0000097, FBgn0000283, FBgn0000546, FBgn0000575, FBgn0000723, FBgn0003165, FBgn0003177, FBgn0003396, FBgn0003502, FBgn0003716, FBgn0003866, FBgn0003997, FBgn0004009, FBgn0015371, FBgn0020496, FBgn0023172, FBgn0028369, FBgn0028386, FBgn0029944, FBgn0043364, FBgn0250876, FBgn0261278
GO:0048812	neuron projection morphogenesis	1.12618e-09	FBgn0000054, FBgn0000097, FBgn0000173, FBgn0000504, FBgn0000546, FBgn0000636, FBgn0000723, FBgn0002543, FBgn0003165, FBgn0003862, FBgn0004370, FBgn0004569, FBgn0004644, FBgn0004652, FBgn0004859, FBgn0005612, FBgn0010113, FBgn0010300, FBgn0010415, FBgn0010575, FBgn0011766, FBgn0015609, FBgn0016797, FBgn0023172, FBgn0025641, FBgn0036101, FBgn0041171, FBgn0041604, FBgn0086655, FBgn0086680, FBgn02508…
GO:0040007	growth	1.31057e-09	FBgn0000504, FBgn0000723, FBgn0002069, FBgn0003165, FBgn0003371, FBgn0003716, FBgn0003997, FBgn0004009, FBgn0004583, FBgn0004644, FBgn0010113, FBgn0010575, FBgn0011766, FBgn0015609, FBgn0016797, FBgn0023172, FBgn0023215, FBgn0028386, FBgn0029944, FBgn0032330, FBgn0036101, FBgn0041171, FBgn0041604, FBgn0086655, FBgn0259176
GO:0051093	negative regulation of developmental process	1.39919e-09	FBgn0000097, FBgn0000504, FBgn0003118, FBgn0003371, FBgn0003396, FBgn0003716, FBgn0003866, FBgn0004009, FBgn0004569, FBgn0004583, FBgn0005672, FBgn0010113, FBgn0010300, FBgn0014141, FBgn0015371, FBgn0015609, FBgn0041184, FBgn0259176
GO:0048667	cell morphogenesis involved in neuron differentiation	1.4048e-09	FBgn0000054, FBgn0000097, FBgn0000173, FBgn0000504, FBgn0000546, FBgn0000636, FBgn0000723, FBgn0002543, FBgn0003165, FBgn0003862, FBgn0004370, FBgn0004569, FBgn0004644, FBgn0004652, FBgn0004859, FBgn0005612, FBgn0010113, FBgn0010300, FBgn0010415, FBgn0010575, FBgn0011766, FBgn0015609, FBgn0016797, FBgn0023172, FBgn0025641, FBgn0036101, FBgn0041171, FBgn0041604, FBgn0086655, FBgn0086680, FBgn02508…
GO:0031175	neuron projection development	1.51132e-09	FBgn0000054, FBgn0000097, FBgn0000173, FBgn0000504, FBgn0000546, FBgn0000636, FBgn0000723, FBgn0002543, FBgn0003165, FBgn0003862, FBgn0004370, FBgn0004569, FBgn0004644, FBgn0004652, FBgn0004859, FBgn0005612, FBgn0010113, FBgn0010300, FBgn0010415, FBgn0010575, FBgn0011766, FBgn0015609, FBgn0016797, FBgn0023172, FBgn0025641, FBgn0036101, FBgn0041171, FBgn0041604, FBgn0086655, FBgn0086680, FBgn02508…
GO:0010629	negative regulation of gene expression	1.63781e-09	FBgn0000097, FBgn0000504, FBgn0000546, FBgn0000575, FBgn0001168, FBgn0003165, FBgn0003396, FBgn0003866, FBgn0004009, FBgn0004399, FBgn0004859, FBgn0004860, FBgn0004861, FBgn0010113, FBgn0010313, FBgn0010575, FBgn0010825, FBgn0011764, FBgn0011837, FBgn0015371, FBgn0020496, FBgn0023214, FBgn0024308, FBgn0028386
GO:0035218	leg disc development	1.79605e-09	FBgn0000157, FBgn0000497, FBgn0001235, FBgn0003866, FBgn0004009, FBgn0004644, FBgn0004892, FBgn0004893, FBgn0010825, FBgn0011764, FBgn0016660, FBgn0036558, FBgn0086655
GO:0045165	cell fate commitment	2.09824e-09	FBgn0000097, FBgn0000546, FBgn0000575, FBgn0001168, FBgn0001235, FBgn0002543, FBgn0002945, FBgn0002973, FBgn0003118, FBgn0003165, FBgn0003177, FBgn0003716, FBgn0004009, FBgn0004569, FBgn0004644, FBgn0005672, FBgn0010113, FBgn0010300, FBgn0010316, FBgn0011591, FBgn0015371, FBgn0016660, FBgn0036558, FBgn0041184, FBgn0086680, FBgn0259176
GO:0016481	negative regulation of transcription	2.3916e-09	FBgn0000097, FBgn0000504, FBgn0000546, FBgn0000575, FBgn0001168, FBgn0003165, FBgn0003396, FBgn0003866, FBgn0004009, FBgn0004859, FBgn0004860, FBgn0004861, FBgn0010313, FBgn0010575, FBgn0010825, FBgn0011764, FBgn0015371, FBgn0020496, FBgn0023214, FBgn0024308, FBgn0028386
GO:0048592	eye morphogenesis	2.50208e-09	FBgn0000097, FBgn0000497, FBgn0000575, FBgn0001168, FBgn0001235, FBgn0003118, FBgn0003396, FBgn0003716, FBgn0003997, FBgn0004009, FBgn0004569, FBgn0004583, FBgn0004644, FBgn0004859, FBgn0005672, FBgn0011591, FBgn0011661, FBgn0015371, FBgn0015609, FBgn0028369, FBgn0028386, FBgn0036558, FBgn0041184, FBgn0043364, FBgn0259176
GO:0048749	compound eye development	2.83787e-09	FBgn0000097, FBgn0000497, FBgn0000575, FBgn0001168, FBgn0001235, FBgn0003118, FBgn0003302, FBgn0003396, FBgn0003716, FBgn0003866, FBgn0003997, FBgn0004009, FBgn0004569, FBgn0004583, FBgn0004644, FBgn0005672, FBgn0011591, FBgn0011661, FBgn0015371, FBgn0015609, FBgn0028369, FBgn0035142, FBgn0036558, FBgn0041184, FBgn0041604, FBgn0259176, FBgn0261458
GO:0007409	axonogenesis	2.99518e-09	FBgn0000173, FBgn0000504, FBgn0000546, FBgn0000636, FBgn0000723, FBgn0002543, FBgn0003862, FBgn0004370, FBgn0004569, FBgn0004644, FBgn0004652, FBgn0010113, FBgn0010300, FBgn0010415, FBgn0010575, FBgn0015609, FBgn0016797, FBgn0023172, FBgn0025641, FBgn0036101, FBgn0041171, FBgn0041604, FBgn0086655, FBgn0086680, FBgn0250876
GO:0035215	genital disc development	4.3575e-09	FBgn0000157, FBgn0000504, FBgn0003118, FBgn0003502, FBgn0003716, FBgn0004009, FBgn0004569, FBgn0004644, FBgn0004859, FBgn0005672
GO:0035282	segmentation	5.05501e-09	FBgn0001168, FBgn0001235, FBgn0002945, FBgn0003118, FBgn0003165, FBgn0003371, FBgn0003866, FBgn0004009, FBgn0004399, FBgn0004644, FBgn0004859, FBgn0004892, FBgn0004893, FBgn0010300, FBgn0010825, FBgn0011591, FBgn0011661, FBgn0011764, FBgn0033378, FBgn0041604, FBgn0086655, FBgn0086680, FBgn0259176, FBgn0260642
GO:0030030	cell projection organization	5.70575e-09	FBgn0000054, FBgn0000097, FBgn0000173, FBgn0000497, FBgn0000504, FBgn0000546, FBgn0000636, FBgn0000723, FBgn0002543, FBgn0003165, FBgn0003862, FBgn0004009, FBgn0004370, FBgn0004569, FBgn0004644, FBgn0004652, FBgn0004859, FBgn0005612, FBgn0010113, FBgn0010300, FBgn0010415, FBgn0010575, FBgn0011766, FBgn0015609, FBgn0016076, FBgn0016797, FBgn0023172, FBgn0025641, FBgn0036101, FBgn0041171, FBgn00416…
GO:0040011	locomotion	5.83041e-09	FBgn0000054, FBgn0000097, FBgn0000504, FBgn0000546, FBgn0000575, FBgn0000636, FBgn0000723, FBgn0001186, FBgn0002543, FBgn0002973, FBgn0003165, FBgn0003716, FBgn0003862, FBgn0004370, FBgn0004569, FBgn0004644, FBgn0004652, FBgn0005672, FBgn0010300, FBgn0010415, FBgn0010575, FBgn0015609, FBgn0017397, FBgn0036101, FBgn0039411, FBgn0041171, FBgn0041604, FBgn0086655, FBgn0086680, FBgn0250823, FBgn02508…
GO:0048729	tissue morphogenesis	6.2678e-09	FBgn0000097, FBgn0000497, FBgn0000575, FBgn0000723, FBgn0002945, FBgn0003118, FBgn0003177, FBgn0003396, FBgn0003502, FBgn0003716, FBgn0003866, FBgn0004009, FBgn0004569, FBgn0004644, FBgn0004861, FBgn0010113, FBgn0011661, FBgn0014141, FBgn0015609, FBgn0017397, FBgn0023172, FBgn0029944, FBgn0038755, FBgn0039411, FBgn0043364, FBgn0261873
GO:0048522	positive regulation of cellular process	6.98425e-09	FBgn0000054, FBgn0000097, FBgn0000504, FBgn0000546, FBgn0001235, FBgn0002543, FBgn0002973, FBgn0003165, FBgn0003716, FBgn0003862, FBgn0003997, FBgn0004009, FBgn0004569, FBgn0004583, FBgn0004644, FBgn0004859, FBgn0005672, FBgn0011591, FBgn0011766, FBgn0015371, FBgn0019624, FBgn0025803, FBgn0026160, FBgn0034667, FBgn0035142, FBgn0036558, FBgn0039141, FBgn0039411, FBgn0041604, FBgn0043364, FBgn02591…
GO:0060429	epithelium development	7.1344e-09	FBgn0000097, FBgn0000497, FBgn0000575, FBgn0000723, FBgn0002945, FBgn0003118, FBgn0003177, FBgn0003396, FBgn0003502, FBgn0003716, FBgn0004009, FBgn0004569, FBgn0004644, FBgn0004859, FBgn0004861, FBgn0010113, FBgn0011661, FBgn0014141, FBgn0015609, FBgn0023172, FBgn0029944, FBgn0038755, FBgn0039411, FBgn0043364, FBgn0261873
GO:0050896	response to stimulus	7.42305e-09	FBgn0000042, FBgn0000054, FBgn0000097, FBgn0000173, FBgn0000504, FBgn0000546, FBgn0000575, FBgn0000636, FBgn0000667, FBgn0000721, FBgn0000723, FBgn0001168, FBgn0002543, FBgn0002973, FBgn0003165, FBgn0003175, FBgn0003177, FBgn0003371, FBgn0003396, FBgn0003464, FBgn0003502, FBgn0003862, FBgn0003997, FBgn0004370, FBgn0004399, FBgn0004569, FBgn0004644, FBgn0004646, FBgn0004652, FBgn0004861, FBgn00056…
GO:0032990	cell part morphogenesis	1.1061e-08	FBgn0000054, FBgn0000097, FBgn0000173, FBgn0000504, FBgn0000546, FBgn0000636, FBgn0000723, FBgn0002543, FBgn0003165, FBgn0003862, FBgn0004370, FBgn0004569, FBgn0004644, FBgn0004652, FBgn0004859, FBgn0005612, FBgn0010113, FBgn0010300, FBgn0010415, FBgn0010575, FBgn0011766, FBgn0015609, FBgn0016797, FBgn0023172, FBgn0025641, FBgn0036101, FBgn0041171, FBgn0041604, FBgn0086655, FBgn0086680, FBgn02508…
GO:0048858	cell projection morphogenesis	1.1061e-08	FBgn0000054, FBgn0000097, FBgn0000173, FBgn0000504, FBgn0000546, FBgn0000636, FBgn0000723, FBgn0002543, FBgn0003165, FBgn0003862, FBgn0004370, FBgn0004569, FBgn0004644, FBgn0004652, FBgn0004859, FBgn0005612, FBgn0010113, FBgn0010300, FBgn0010415, FBgn0010575, FBgn0011766, FBgn0015609, FBgn0016797, FBgn0023172, FBgn0025641, FBgn0036101, FBgn0041171, FBgn0041604, FBgn0086655, FBgn0086680, FBgn02508…
GO:0045934	negative regulation of nucleobase, nucleoside, nucleotide and nucleic acid metabolic process	1.44282e-08	FBgn0000097, FBgn0000504, FBgn0000546, FBgn0000575, FBgn0001168, FBgn0003165, FBgn0003396, FBgn0003866, FBgn0004009, FBgn0004859, FBgn0004860, FBgn0004861, FBgn0010313, FBgn0010575, FBgn0010825, FBgn0011764, FBgn0015371, FBgn0020496, FBgn0023214, FBgn0024308, FBgn0028386
GO:0051172	negative regulation of nitrogen compound metabolic process	1.44282e-08	FBgn0000097, FBgn0000504, FBgn0000546, FBgn0000575, FBgn0001168, FBgn0003165, FBgn0003396, FBgn0003866, FBgn0004009, FBgn0004859, FBgn0004860, FBgn0004861, FBgn0010313, FBgn0010575, FBgn0010825, FBgn0011764, FBgn0015371, FBgn0020496, FBgn0023214, FBgn0024308, FBgn0028386
GO:0010605	negative regulation of macromolecule metabolic process	1.74266e-08	FBgn0000097, FBgn0000504, FBgn0000546, FBgn0000575, FBgn0001168, FBgn0003165, FBgn0003396, FBgn0003866, FBgn0004009, FBgn0004399, FBgn0004859, FBgn0004860, FBgn0004861, FBgn0010113, FBgn0010313, FBgn0010316, FBgn0010575, FBgn0010825, FBgn0011224, FBgn0011764, FBgn0011837, FBgn0015371, FBgn0020496, FBgn0023214, FBgn0024308, FBgn0028386
GO:0045595	regulation of cell differentiation	1.74408e-08	FBgn0000097, FBgn0002973, FBgn0003118, FBgn0003165, FBgn0003371, FBgn0003716, FBgn0003997, FBgn0004009, FBgn0004569, FBgn0004583, FBgn0004859, FBgn0005672, FBgn0010113, FBgn0010300, FBgn0014141, FBgn0015371, FBgn0015609, FBgn0016660, FBgn0023172, FBgn0025641, FBgn0033378, FBgn0041184, FBgn0259176
GO:0002009	morphogenesis of an epithelium	2.1906e-08	FBgn0000097, FBgn0000497, FBgn0000575, FBgn0000723, FBgn0002945, FBgn0003118, FBgn0003177, FBgn0003396, FBgn0003502, FBgn0003716, FBgn0004009, FBgn0004569, FBgn0004644, FBgn0004861, FBgn0010113, FBgn0011661, FBgn0014141, FBgn0015609, FBgn0023172, FBgn0029944, FBgn0038755, FBgn0039411, FBgn0043364, FBgn0261873
GO:0010558	negative regulation of macromolecule biosynthetic process	3.50927e-08	FBgn0000097, FBgn0000504, FBgn0000546, FBgn0000575, FBgn0001168, FBgn0003165, FBgn0003396, FBgn0003866, FBgn0004009, FBgn0004859, FBgn0004860, FBgn0004861, FBgn0010313, FBgn0010575, FBgn0010825, FBgn0011224, FBgn0011764, FBgn0015371, FBgn0020496, FBgn0023214, FBgn0024308, FBgn0028386
GO:2000113	negative regulation of cellular macromolecule biosynthetic process	3.50927e-08	FBgn0000097, FBgn0000504, FBgn0000546, FBgn0000575, FBgn0001168, FBgn0003165, FBgn0003396, FBgn0003866, FBgn0004009, FBgn0004859, FBgn0004860, FBgn0004861, FBgn0010313, FBgn0010575, FBgn0010825, FBgn0011224, FBgn0011764, FBgn0015371, FBgn0020496, FBgn0023214, FBgn0024308, FBgn0028386
GO:0009890	negative regulation of biosynthetic process	4.18003e-08	FBgn0000097, FBgn0000504, FBgn0000546, FBgn0000575, FBgn0001168, FBgn0003165, FBgn0003396, FBgn0003866, FBgn0004009, FBgn0004859, FBgn0004860, FBgn0004861, FBgn0010313, FBgn0010575, FBgn0010825, FBgn0011224, FBgn0011764, FBgn0015371, FBgn0020496, FBgn0023214, FBgn0024308, FBgn0028386
GO:0031327	negative regulation of cellular biosynthetic process	4.18003e-08	FBgn0000097, FBgn0000504, FBgn0000546, FBgn0000575, FBgn0001168, FBgn0003165, FBgn0003396, FBgn0003866, FBgn0004009, FBgn0004859, FBgn0004860, FBgn0004861, FBgn0010313, FBgn0010575, FBgn0010825, FBgn0011224, FBgn0011764, FBgn0015371, FBgn0020496, FBgn0023214, FBgn0024308, FBgn0028386
GO:0009892	negative regulation of metabolic process	5.61033e-08	FBgn0000097, FBgn0000504, FBgn0000546, FBgn0000575, FBgn0001168, FBgn0003165, FBgn0003396, FBgn0003866, FBgn0004009, FBgn0004399, FBgn0004859, FBgn0004860, FBgn0004861, FBgn0010113, FBgn0010313, FBgn0010316, FBgn0010575, FBgn0010825, FBgn0011224, FBgn0011764, FBgn0011837, FBgn0015371, FBgn0020496, FBgn0023214, FBgn0024308, FBgn0028386
GO:0003006	developmental process involved in reproduction	5.93457e-08	FBgn0000042, FBgn0000097, FBgn0000157, FBgn0000504, FBgn0000546, FBgn0000575, FBgn0000636, FBgn0003118, FBgn0003165, FBgn0003371, FBgn0003502, FBgn0003716, FBgn0004009, FBgn0004399, FBgn0004400, FBgn0004569, FBgn0004644, FBgn0004652, FBgn0004859, FBgn0004861, FBgn0005672, FBgn0010316, FBgn0011224, FBgn0011591, FBgn0011661, FBgn0011766, FBgn0014141, FBgn0016797, FBgn0023172, FBgn0028386, FBgn00333…
GO:0042221	response to chemical stimulus	6.93781e-08	FBgn0000054, FBgn0000173, FBgn0000504, FBgn0000546, FBgn0000636, FBgn0000723, FBgn0001168, FBgn0002543, FBgn0003371, FBgn0003396, FBgn0003862, FBgn0003997, FBgn0004370, FBgn0004399, FBgn0004569, FBgn0004644, FBgn0004652, FBgn0004861, FBgn0005672, FBgn0010300, FBgn0010415, FBgn0010575, FBgn0011661, FBgn0014141, FBgn0015609, FBgn0016930, FBgn0024329, FBgn0031464, FBgn0033073, FBgn0036101, FBgn00411…
GO:0048518	positive regulation of biological process	7.33837e-08	FBgn0000054, FBgn0000097, FBgn0000504, FBgn0000546, FBgn0001235, FBgn0002543, FBgn0002973, FBgn0003165, FBgn0003716, FBgn0003862, FBgn0003997, FBgn0004009, FBgn0004569, FBgn0004583, FBgn0004644, FBgn0004859, FBgn0005672, FBgn0011591, FBgn0011766, FBgn0015371, FBgn0019624, FBgn0025803, FBgn0026160, FBgn0034667, FBgn0035142, FBgn0036558, FBgn0039141, FBgn0039411, FBgn0041604, FBgn0043364, FBgn02591…
GO:0001745	compound eye morphogenesis	8.92024e-08	FBgn0000097, FBgn0000497, FBgn0000575, FBgn0001168, FBgn0001235, FBgn0003118, FBgn0003396, FBgn0003716, FBgn0003997, FBgn0004009, FBgn0004569, FBgn0004583, FBgn0004644, FBgn0005672, FBgn0011591, FBgn0011661, FBgn0015371, FBgn0015609, FBgn0028369, FBgn0036558, FBgn0041184, FBgn0259176
GO:0006357	regulation of transcription from RNA polymerase II promoter	1.08219e-07	FBgn0000054, FBgn0000504, FBgn0000546, FBgn0000575, FBgn0001168, FBgn0001235, FBgn0003396, FBgn0003866, FBgn0004396, FBgn0004644, FBgn0004859, FBgn0005771, FBgn0010575, FBgn0011764, FBgn0011766, FBgn0015371, FBgn0020496, FBgn0034667, FBgn0039411, FBgn0260642
GO:0001708	cell fate specification	1.08404e-07	FBgn0002543, FBgn0002945, FBgn0002973, FBgn0003118, FBgn0003177, FBgn0004009, FBgn0004569, FBgn0004644, FBgn0010113, FBgn0011591, FBgn0015371, FBgn0016660, FBgn0259176
GO:0048645	organ formation	1.18319e-07	FBgn0000157, FBgn0001235, FBgn0002543, FBgn0002973, FBgn0003396, FBgn0003716, FBgn0003866, FBgn0004009, FBgn0004644, FBgn0004859, FBgn0005672
GO:0031324	negative regulation of cellular metabolic process	1.54757e-07	FBgn0000097, FBgn0000504, FBgn0000546, FBgn0000575, FBgn0001168, FBgn0003165, FBgn0003396, FBgn0003866, FBgn0004009, FBgn0004859, FBgn0004860, FBgn0004861, FBgn0010313, FBgn0010316, FBgn0010575, FBgn0010825, FBgn0011224, FBgn0011764, FBgn0015371, FBgn0020496, FBgn0023214, FBgn0024308, FBgn0028386
GO:0048589	developmental growth	1.59814e-07	FBgn0000504, FBgn0000723, FBgn0003165, FBgn0003371, FBgn0003716, FBgn0004009, FBgn0004583, FBgn0004644, FBgn0010113, FBgn0010575, FBgn0015609, FBgn0016797, FBgn0023172, FBgn0029944, FBgn0036101, FBgn0041604, FBgn0086655
GO:0010453	regulation of cell fate commitment	1.80737e-07	FBgn0003118, FBgn0004009, FBgn0004569, FBgn0010113, FBgn0015371, FBgn0016660, FBgn0041184, FBgn0259176
GO:0046530	photoreceptor cell differentiation	2.68973e-07	FBgn0000097, FBgn0000173, FBgn0000546, FBgn0000575, FBgn0000723, FBgn0001168, FBgn0001235, FBgn0003118, FBgn0004583, FBgn0004644, FBgn0005672, FBgn0010575, FBgn0011661, FBgn0015609, FBgn0023214, FBgn0041184, FBgn0259176
GO:0090304	nucleic acid metabolic process	2.80576e-07	FBgn0000054, FBgn0000097, FBgn0000157, FBgn0000504, FBgn0000546, FBgn0000575, FBgn0001168, FBgn0001235, FBgn0002069, FBgn0003118, FBgn0003129, FBgn0003165, FBgn0003371, FBgn0003396, FBgn0003502, FBgn0003862, FBgn0003866, FBgn0004009, FBgn0004396, FBgn0004607, FBgn0004644, FBgn0004859, FBgn0004860, FBgn0004861, FBgn0004865, FBgn0004892, FBgn0004914, FBgn0005612, FBgn0005771, FBgn0010300, FBgn00103…
GO:0006935	chemotaxis	2.83263e-07	FBgn0000504, FBgn0000636, FBgn0000723, FBgn0002543, FBgn0003862, FBgn0004370, FBgn0004569, FBgn0004644, FBgn0004652, FBgn0010300, FBgn0010415, FBgn0010575, FBgn0015609, FBgn0036101, FBgn0041171, FBgn0041604, FBgn0086655, FBgn0086680, FBgn0250876
GO:0045892	negative regulation of transcription, DNA-dependent	3.4613e-07	FBgn0000504, FBgn0000546, FBgn0000575, FBgn0001168, FBgn0003165, FBgn0003396, FBgn0003866, FBgn0004859, FBgn0004860, FBgn0004861, FBgn0010313, FBgn0010575, FBgn0011764, FBgn0015371, FBgn0020496, FBgn0024308
GO:0048190	wing disc dorsal/ventral pattern formation	4.40789e-07	FBgn0003118, FBgn0003396, FBgn0004009, FBgn0010575, FBgn0011591, FBgn0028386, FBgn0037021, FBgn0041604, FBgn0043364, FBgn0261458
GO:0048646	anatomical structure formation involved in morphogenesis	4.95077e-07	FBgn0000042, FBgn0000157, FBgn0000497, FBgn0000546, FBgn0001235, FBgn0002543, FBgn0002973, FBgn0003396, FBgn0003502, FBgn0003716, FBgn0003866, FBgn0004009, FBgn0004400, FBgn0004644, FBgn0004859, FBgn0004861, FBgn0005672, FBgn0010316, FBgn0011591, FBgn0011766, FBgn0014141, FBgn0017397, FBgn0023172, FBgn0028369, FBgn0028386, FBgn0028978, FBgn0036257, FBgn0259176, FBgn0261278
GO:0045596	negative regulation of cell differentiation	6.29222e-07	FBgn0000097, FBgn0003118, FBgn0003371, FBgn0003716, FBgn0004009, FBgn0004569, FBgn0010113, FBgn0010300, FBgn0014141, FBgn0015371, FBgn0015609, FBgn0041184, FBgn0259176
GO:0051253	negative regulation of RNA metabolic process	7.16248e-07	FBgn0000504, FBgn0000546, FBgn0000575, FBgn0001168, FBgn0003165, FBgn0003396, FBgn0003866, FBgn0004859, FBgn0004860, FBgn0004861, FBgn0010313, FBgn0010575, FBgn0011764, FBgn0015371, FBgn0020496, FBgn0024308
GO:0007411	axon guidance	8.02443e-07	FBgn0000504, FBgn0000636, FBgn0000723, FBgn0002543, FBgn0003862, FBgn0004370, FBgn0004569, FBgn0004652, FBgn0010300, FBgn0010415, FBgn0010575, FBgn0015609, FBgn0036101, FBgn0041171, FBgn0041604, FBgn0086655, FBgn0086680, FBgn0250876
GO:0007507	heart development	8.47409e-07	FBgn0000546, FBgn0002543, FBgn0002973, FBgn0003118, FBgn0003371, FBgn0003716, FBgn0004009, FBgn0004644, FBgn0004859, FBgn0016660, FBgn0035083, FBgn0260642
GO:0006139	nucleobase, nucleoside, nucleotide and nucleic acid metabolic process	8.69743e-07	FBgn0000054, FBgn0000097, FBgn0000157, FBgn0000504, FBgn0000546, FBgn0000575, FBgn0001168, FBgn0001235, FBgn0002069, FBgn0003118, FBgn0003129, FBgn0003165, FBgn0003371, FBgn0003396, FBgn0003502, FBgn0003862, FBgn0003866, FBgn0004009, FBgn0004396, FBgn0004607, FBgn0004644, FBgn0004859, FBgn0004860, FBgn0004861, FBgn0004865, FBgn0004892, FBgn0004914, FBgn0005612, FBgn0005771, FBgn0010300, FBgn00103…
GO:0022603	regulation of anatomical structure morphogenesis	9.33869e-07	FBgn0000097, FBgn0002945, FBgn0003396, FBgn0003716, FBgn0003866, FBgn0003997, FBgn0004009, FBgn0005672, FBgn0015371, FBgn0015609, FBgn0023172, FBgn0025641, FBgn0041184
GO:0002118	aggressive behavior	9.7581e-07	FBgn0000042, FBgn0000575, FBgn0003175, FBgn0004652, FBgn0005771, FBgn0010470, FBgn0030844, FBgn0031453, FBgn0036152, FBgn0086686
GO:0051726	regulation of cell cycle	1.12894e-06	FBgn0003165, FBgn0003302, FBgn0004009, FBgn0004583, FBgn0004644, FBgn0004859, FBgn0010300, FBgn0010316, FBgn0011766, FBgn0019624, FBgn0023215, FBgn0024308, FBgn0025803, FBgn0028978, FBgn0031696, FBgn0041171, FBgn0260946, FBgn0261278
GO:0035287	head segmentation	1.16811e-06	FBgn0001168, FBgn0001235, FBgn0003866, FBgn0004009, FBgn0004644, FBgn0086655, FBgn0260642
GO:0019953	sexual reproduction	1.18521e-06	FBgn0000042, FBgn0000097, FBgn0000504, FBgn0000546, FBgn0000575, FBgn0000636, FBgn0003118, FBgn0003165, FBgn0003371, FBgn0003502, FBgn0003716, FBgn0003862, FBgn0004009, FBgn0004399, FBgn0004400, FBgn0004569, FBgn0004644, FBgn0004859, FBgn0004861, FBgn0005672, FBgn0010300, FBgn0010316, FBgn0011224, FBgn0011591, FBgn0011661, FBgn0011766, FBgn0014141, FBgn0023172, FBgn0028386, FBgn0032330, FBgn00333…
GO:0040008	regulation of growth	1.27269e-06	FBgn0000504, FBgn0003165, FBgn0003371, FBgn0003716, FBgn0003997, FBgn0004583, FBgn0004644, FBgn0010575, FBgn0015609, FBgn0023215, FBgn0028386, FBgn0032330, FBgn0041171, FBgn0041604, FBgn0259176
GO:2000027	regulation of organ morphogenesis	1.41311e-06	FBgn0000097, FBgn0002945, FBgn0003396, FBgn0003716, FBgn0003866, FBgn0003997, FBgn0004009, FBgn0005672, FBgn0015371, FBgn0041184
GO:0048610	cellular process involved in reproduction	1.43074e-06	FBgn0000042, FBgn0000097, FBgn0000546, FBgn0000575, FBgn0000636, FBgn0003118, FBgn0003165, FBgn0003371, FBgn0003502, FBgn0003716, FBgn0003862, FBgn0004009, FBgn0004399, FBgn0004400, FBgn0004569, FBgn0004644, FBgn0004859, FBgn0004861, FBgn0005672, FBgn0010316, FBgn0011224, FBgn0011661, FBgn0011766, FBgn0014141, FBgn0023172, FBgn0028386, FBgn0033378, FBgn0086655, FBgn0086916, FBgn0259176, FBgn02614…
GO:0000122	negative regulation of transcription from RNA polymerase II promoter	1.69043e-06	FBgn0000504, FBgn0000575, FBgn0001168, FBgn0003396, FBgn0003866, FBgn0004859, FBgn0010575, FBgn0011764, FBgn0015371, FBgn0020496
GO:0007450	dorsal/ventral pattern formation, imaginal disc	1.69043e-06	FBgn0003118, FBgn0003396, FBgn0004009, FBgn0010575, FBgn0011591, FBgn0028386, FBgn0037021, FBgn0041604, FBgn0043364, FBgn0261458
GO:0030707	ovarian follicle cell development	1.7072e-06	FBgn0000097, FBgn0000546, FBgn0000636, FBgn0003118, FBgn0003371, FBgn0003716, FBgn0004009, FBgn0004400, FBgn0004569, FBgn0004644, FBgn0004859, FBgn0004861, FBgn0005672, FBgn0011766, FBgn0014141, FBgn0028386, FBgn0086655, FBgn0259176
GO:0007276	gamete generation	1.86464e-06	FBgn0000042, FBgn0000097, FBgn0000504, FBgn0000546, FBgn0000575, FBgn0000636, FBgn0003118, FBgn0003165, FBgn0003371, FBgn0003502, FBgn0003716, FBgn0003862, FBgn0004009, FBgn0004399, FBgn0004400, FBgn0004569, FBgn0004644, FBgn0004859, FBgn0004861, FBgn0005672, FBgn0010300, FBgn0010316, FBgn0011224, FBgn0011591, FBgn0011661, FBgn0011766, FBgn0014141, FBgn0023172, FBgn0028386, FBgn0032330, FBgn00333…
GO:0048598	embryonic morphogenesis	2.00504e-06	FBgn0000097, FBgn0000546, FBgn0000575, FBgn0000723, FBgn0003165, FBgn0003177, FBgn0003396, FBgn0003502, FBgn0003716, FBgn0003866, FBgn0003997, FBgn0004009, FBgn0017397, FBgn0023172, FBgn0028978, FBgn0029944, FBgn0036257, FBgn0043364, FBgn0261873
GO:0023033	signaling pathway	2.09284e-06	FBgn0000097, FBgn0000546, FBgn0002945, FBgn0002973, FBgn0003118, FBgn0003177, FBgn0003371, FBgn0003390, FBgn0003396, FBgn0003502, FBgn0003716, FBgn0004009, FBgn0004569, FBgn0004583, FBgn0004644, FBgn0004859, FBgn0005672, FBgn0010575, FBgn0010825, FBgn0011224, FBgn0011591, FBgn0011661, FBgn0015296, FBgn0016797, FBgn0020496, FBgn0023172, FBgn0023214, FBgn0024329, FBgn0028509, FBgn0029944, FBgn00308…
GO:0042659	regulation of cell fate specification	2.28059e-06	FBgn0003118, FBgn0004009, FBgn0004569, FBgn0010113, FBgn0015371, FBgn0016660, FBgn0259176
GO:0035110	leg morphogenesis	2.48665e-06	FBgn0000157, FBgn0000497, FBgn0001235, FBgn0003866, FBgn0004892, FBgn0004893, FBgn0010825, FBgn0011591, FBgn0036558
GO:0042330	taxis	2.69564e-06	FBgn0000504, FBgn0000636, FBgn0000723, FBgn0002543, FBgn0003862, FBgn0004370, FBgn0004569, FBgn0004644, FBgn0004652, FBgn0010300, FBgn0010415, FBgn0010575, FBgn0015609, FBgn0036101, FBgn0041171, FBgn0041604, FBgn0086655, FBgn0086680, FBgn0250876
GO:0035108	limb morphogenesis	3.02626e-06	FBgn0000157, FBgn0000497, FBgn0001235, FBgn0003866, FBgn0004892, FBgn0004893, FBgn0010825, FBgn0011591, FBgn0036558
GO:0060173	limb development	3.02626e-06	FBgn0000157, FBgn0000497, FBgn0001235, FBgn0003866, FBgn0004892, FBgn0004893, FBgn0010825, FBgn0011591, FBgn0036558
GO:0000003	reproduction	3.30807e-06	FBgn0000042, FBgn0000097, FBgn0000157, FBgn0000504, FBgn0000546, FBgn0000575, FBgn0000636, FBgn0003118, FBgn0003165, FBgn0003371, FBgn0003502, FBgn0003716, FBgn0003862, FBgn0004009, FBgn0004399, FBgn0004400, FBgn0004569, FBgn0004644, FBgn0004652, FBgn0004859, FBgn0004861, FBgn0005672, FBgn0010300, FBgn0010316, FBgn0011224, FBgn0011591, FBgn0011661, FBgn0011766, FBgn0014141, FBgn0016797, FBgn00231…
GO:0022414	reproductive process	3.30807e-06	FBgn0000042, FBgn0000097, FBgn0000157, FBgn0000504, FBgn0000546, FBgn0000575, FBgn0000636, FBgn0003118, FBgn0003165, FBgn0003371, FBgn0003502, FBgn0003716, FBgn0003862, FBgn0004009, FBgn0004399, FBgn0004400, FBgn0004569, FBgn0004644, FBgn0004652, FBgn0004859, FBgn0004861, FBgn0005672, FBgn0010300, FBgn0010316, FBgn0011224, FBgn0011591, FBgn0011661, FBgn0011766, FBgn0014141, FBgn0016797, FBgn00231…
GO:0016070	RNA metabolic process	4.84314e-06	FBgn0000054, FBgn0000097, FBgn0000157, FBgn0000504, FBgn0000546, FBgn0000575, FBgn0001168, FBgn0001235, FBgn0002069, FBgn0003118, FBgn0003165, FBgn0003371, FBgn0003396, FBgn0003862, FBgn0003866, FBgn0004396, FBgn0004607, FBgn0004644, FBgn0004859, FBgn0004860, FBgn0004861, FBgn0004865, FBgn0004914, FBgn0005771, FBgn0010300, FBgn0010313, FBgn0010575, FBgn0011224, FBgn0011638, FBgn0011764, FBgn00117…
GO:0007478	leg disc morphogenesis	5.00039e-06	FBgn0000497, FBgn0001235, FBgn0003866, FBgn0004644, FBgn0004892, FBgn0004893, FBgn0010825, FBgn0036558
GO:0035109	imaginal disc-derived limb morphogenesis	5.00039e-06	FBgn0000157, FBgn0000497, FBgn0001235, FBgn0003866, FBgn0004892, FBgn0004893, FBgn0010825, FBgn0036558
GO:0009996	negative regulation of cell fate specification	5.33071e-06	FBgn0003118, FBgn0004009, FBgn0004569, FBgn0010113, FBgn0015371, FBgn0259176
GO:0010454	negative regulation of cell fate commitment	5.33412e-06	FBgn0003118, FBgn0004009, FBgn0004569, FBgn0010113, FBgn0015371, FBgn0259176
GO:0035223	leg disc pattern formation	5.33412e-06	FBgn0000157, FBgn0001235, FBgn0003866, FBgn0004009, FBgn0016660, FBgn0086655
GO:0007417	central nervous system development	6.21678e-06	FBgn0000042, FBgn0000504, FBgn0000546, FBgn0000575, FBgn0001235, FBgn0002543, FBgn0002973, FBgn0004009, FBgn0004370, FBgn0004607, FBgn0004644, FBgn0004652, FBgn0004861, FBgn0010300, FBgn0029092, FBgn0086655, FBgn0086680, FBgn0250876
GO:0002121	inter-male aggressive behavior	6.31166e-06	FBgn0000042, FBgn0000575, FBgn0003175, FBgn0005771, FBgn0010470, FBgn0030844, FBgn0031453, FBgn0036152, FBgn0086686
GO:0032504	multicellular organism reproduction	6.71675e-06	FBgn0000042, FBgn0000097, FBgn0000504, FBgn0000546, FBgn0000575, FBgn0000636, FBgn0003118, FBgn0003165, FBgn0003371, FBgn0003502, FBgn0003716, FBgn0003862, FBgn0004009, FBgn0004399, FBgn0004400, FBgn0004569, FBgn0004644, FBgn0004652, FBgn0004859, FBgn0004861, FBgn0005672, FBgn0010300, FBgn0010316, FBgn0011224, FBgn0011591, FBgn0011661, FBgn0011766, FBgn0014141, FBgn0023172, FBgn0028386, FBgn00323…
GO:0048609	multicellular organismal reproductive process	6.71675e-06	FBgn0000042, FBgn0000097, FBgn0000504, FBgn0000546, FBgn0000575, FBgn0000636, FBgn0003118, FBgn0003165, FBgn0003371, FBgn0003502, FBgn0003716, FBgn0003862, FBgn0004009, FBgn0004399, FBgn0004400, FBgn0004569, FBgn0004644, FBgn0004652, FBgn0004859, FBgn0004861, FBgn0005672, FBgn0010300, FBgn0010316, FBgn0011224, FBgn0011591, FBgn0011661, FBgn0011766, FBgn0014141, FBgn0023172, FBgn0028386, FBgn00323…
GO:0048477	oogenesis	6.99341e-06	FBgn0000097, FBgn0000546, FBgn0000636, FBgn0003118, FBgn0003165, FBgn0003371, FBgn0003502, FBgn0003716, FBgn0004009, FBgn0004399, FBgn0004400, FBgn0004569, FBgn0004644, FBgn0004859, FBgn0004861, FBgn0005672, FBgn0010300, FBgn0010316, FBgn0011224, FBgn0011591, FBgn0011661, FBgn0011766, FBgn0014141, FBgn0028386, FBgn0033378, FBgn0086655, FBgn0259176, FBgn0261458
GO:0023052	signaling	8.31852e-06	FBgn0000097, FBgn0000504, FBgn0000546, FBgn0002945, FBgn0002973, FBgn0003118, FBgn0003165, FBgn0003177, FBgn0003371, FBgn0003390, FBgn0003396, FBgn0003502, FBgn0003716, FBgn0004009, FBgn0004569, FBgn0004583, FBgn0004644, FBgn0004646, FBgn0004652, FBgn0004859, FBgn0005672, FBgn0010575, FBgn0010825, FBgn0011224, FBgn0011591, FBgn0011661, FBgn0015296, FBgn0016797, FBgn0017397, FBgn0020496, FBgn00231…
GO:0048732	gland development	8.63395e-06	FBgn0000546, FBgn0001168, FBgn0001235, FBgn0002543, FBgn0003396, FBgn0003502, FBgn0003716, FBgn0003866, FBgn0003997, FBgn0004009, FBgn0004396, FBgn0005672, FBgn0014141, FBgn0016797, FBgn0043364, FBgn0259176, FBgn0260642
GO:0009880	embryonic pattern specification	8.84691e-06	FBgn0001168, FBgn0001235, FBgn0002945, FBgn0003118, FBgn0003165, FBgn0003371, FBgn0003866, FBgn0004009, FBgn0004399, FBgn0004644, FBgn0004859, FBgn0010825, FBgn0011661, FBgn0023214, FBgn0033378, FBgn0041604, FBgn0086655, FBgn0260642
GO:0007292	female gamete generation	9.59466e-06	FBgn0000097, FBgn0000546, FBgn0000636, FBgn0003118, FBgn0003165, FBgn0003371, FBgn0003502, FBgn0003716, FBgn0004009, FBgn0004399, FBgn0004400, FBgn0004569, FBgn0004644, FBgn0004859, FBgn0004861, FBgn0005672, FBgn0010300, FBgn0010316, FBgn0011224, FBgn0011591, FBgn0011661, FBgn0011766, FBgn0014141, FBgn0028386, FBgn0033378, FBgn0086655, FBgn0259176, FBgn0261458
GO:0006366	transcription from RNA polymerase II promoter	1.13585e-05	FBgn0000054, FBgn0000504, FBgn0000546, FBgn0000575, FBgn0001168, FBgn0001235, FBgn0003396, FBgn0003866, FBgn0004396, FBgn0004644, FBgn0004859, FBgn0005771, FBgn0010575, FBgn0011764, FBgn0011766, FBgn0015371, FBgn0020496, FBgn0034667, FBgn0039411, FBgn0260642
GO:0034641	cellular nitrogen compound metabolic process	1.18871e-05	FBgn0000054, FBgn0000097, FBgn0000157, FBgn0000504, FBgn0000546, FBgn0000575, FBgn0001168, FBgn0001235, FBgn0002069, FBgn0003118, FBgn0003129, FBgn0003165, FBgn0003371, FBgn0003396, FBgn0003502, FBgn0003862, FBgn0003866, FBgn0004009, FBgn0004396, FBgn0004607, FBgn0004644, FBgn0004859, FBgn0004860, FBgn0004861, FBgn0004865, FBgn0004892, FBgn0004914, FBgn0005612, FBgn0005771, FBgn0010300, FBgn00103…
GO:0034645	cellular macromolecule biosynthetic process	1.34689e-05	FBgn0000054, FBgn0000097, FBgn0000157, FBgn0000504, FBgn0000546, FBgn0000575, FBgn0001168, FBgn0001235, FBgn0002069, FBgn0003118, FBgn0003129, FBgn0003165, FBgn0003371, FBgn0003396, FBgn0003502, FBgn0003862, FBgn0003866, FBgn0004009, FBgn0004396, FBgn0004607, FBgn0004644, FBgn0004859, FBgn0004860, FBgn0004861, FBgn0004865, FBgn0004892, FBgn0004914, FBgn0005612, FBgn0005771, FBgn0010300, FBgn00103…
GO:0008587	imaginal disc-derived wing margin morphogenesis	1.37645e-05	FBgn0000244, FBgn0011224, FBgn0011591, FBgn0016797, FBgn0017397, FBgn0035142, FBgn0036558, FBgn0041604
GO:0007449	proximal/distal pattern formation, imaginal disc	1.47083e-05	FBgn0000157, FBgn0001235, FBgn0003866, FBgn0004009, FBgn0004644, FBgn0086655
GO:0009059	macromolecule biosynthetic process	1.54666e-05	FBgn0000054, FBgn0000097, FBgn0000157, FBgn0000504, FBgn0000546, FBgn0000575, FBgn0001168, FBgn0001235, FBgn0002069, FBgn0003118, FBgn0003129, FBgn0003165, FBgn0003371, FBgn0003396, FBgn0003502, FBgn0003862, FBgn0003866, FBgn0004009, FBgn0004396, FBgn0004607, FBgn0004644, FBgn0004859, FBgn0004860, FBgn0004861, FBgn0004865, FBgn0004892, FBgn0004914, FBgn0005612, FBgn0005771, FBgn0010300, FBgn00103…
GO:0016337	cell-cell adhesion	1.64966e-05	FBgn0000097, FBgn0000497, FBgn0000636, FBgn0002543, FBgn0003118, FBgn0003177, FBgn0003716, FBgn0004569, FBgn0015609, FBgn0028369
GO:0009605	response to external stimulus	1.77435e-05	FBgn0000504, FBgn0000575, FBgn0000636, FBgn0000723, FBgn0002543, FBgn0003371, FBgn0003862, FBgn0003997, FBgn0004370, FBgn0004569, FBgn0004644, FBgn0004646, FBgn0004652, FBgn0010300, FBgn0010415, FBgn0010575, FBgn0015609, FBgn0036101, FBgn0041171, FBgn0041604, FBgn0086655, FBgn0086680, FBgn0250876
GO:0051128	regulation of cellular component organization	1.8234e-05	FBgn0002973, FBgn0003165, FBgn0003302, FBgn0003371, FBgn0003502, FBgn0003716, FBgn0011661, FBgn0015609, FBgn0023172, FBgn0023215, FBgn0025641, FBgn0028386, FBgn0028978, FBgn0031696, FBgn0033378, FBgn0036558, FBgn0039141, FBgn0041171, FBgn0259176, FBgn0260946
GO:0007446	imaginal disc growth	1.88525e-05	FBgn0000504, FBgn0003716, FBgn0004009, FBgn0004583, FBgn0004644, FBgn0010575, FBgn0041604
GO:0007432	salivary gland boundary specification	1.98521e-05	FBgn0001235, FBgn0002543, FBgn0003396, FBgn0003716, FBgn0003866, FBgn0005672
GO:0016049	cell growth	2.03633e-05	FBgn0000723, FBgn0003716, FBgn0004009, FBgn0010113, FBgn0015609, FBgn0016797, FBgn0023172, FBgn0023215, FBgn0028386, FBgn0029944, FBgn0259176
GO:0007166	cell surface receptor linked signaling pathway	2.30746e-05	FBgn0002945, FBgn0002973, FBgn0003118, FBgn0003371, FBgn0003390, FBgn0003396, FBgn0003716, FBgn0004009, FBgn0004569, FBgn0004583, FBgn0004644, FBgn0004859, FBgn0005672, FBgn0010575, FBgn0010825, FBgn0011224, FBgn0011591, FBgn0011661, FBgn0015296, FBgn0016797, FBgn0020496, FBgn0023214, FBgn0031458, FBgn0031903, FBgn0035142, FBgn0036558, FBgn0037960, FBgn0038279, FBgn0038755, FBgn0041184, FBgn00416…
GO:0046620	regulation of organ growth	2.88658e-05	FBgn0000504, FBgn0003716, FBgn0003997, FBgn0004583, FBgn0004644, FBgn0010575, FBgn0041604
GO:0016331	morphogenesis of embryonic epithelium	2.91771e-05	FBgn0000097, FBgn0000575, FBgn0000723, FBgn0003177, FBgn0003396, FBgn0003502, FBgn0003716, FBgn0004009, FBgn0023172, FBgn0029944, FBgn0043364, FBgn0261873
GO:0042461	photoreceptor cell development	3.08558e-05	FBgn0000097, FBgn0000173, FBgn0000546, FBgn0000723, FBgn0003118, FBgn0005672, FBgn0010575, FBgn0011661, FBgn0015609, FBgn0023214
GO:0016043	cellular component organization	3.13363e-05	FBgn0000042, FBgn0000054, FBgn0000097, FBgn0000173, FBgn0000244, FBgn0000497, FBgn0000504, FBgn0000546, FBgn0000636, FBgn0000667, FBgn0000723, FBgn0001168, FBgn0002543, FBgn0002973, FBgn0003118, FBgn0003137, FBgn0003165, FBgn0003302, FBgn0003371, FBgn0003502, FBgn0003716, FBgn0003862, FBgn0004009, FBgn0004370, FBgn0004399, FBgn0004400, FBgn0004569, FBgn0004644, FBgn0004652, FBgn0004859, FBgn00048…
GO:0009954	proximal/distal pattern formation	3.43977e-05	FBgn0000157, FBgn0001235, FBgn0003866, FBgn0004009, FBgn0004644, FBgn0086655
GO:0007480	imaginal disc-derived leg morphogenesis	3.54085e-05	FBgn0000497, FBgn0001235, FBgn0003866, FBgn0004892, FBgn0004893, FBgn0010825, FBgn0036558
GO:0035127	post-embryonic limb morphogenesis	3.54085e-05	FBgn0000497, FBgn0001235, FBgn0003866, FBgn0004892, FBgn0004893, FBgn0010825, FBgn0036558
GO:0035265	organ growth	3.87572e-05	FBgn0000504, FBgn0003716, FBgn0003997, FBgn0004009, FBgn0004583, FBgn0004644, FBgn0010575, FBgn0041604
GO:0009953	dorsal/ventral pattern formation	4.26957e-05	FBgn0003118, FBgn0003396, FBgn0003716, FBgn0004009, FBgn0004396, FBgn0010575, FBgn0011591, FBgn0028386, FBgn0033378, FBgn0037021, FBgn0041604, FBgn0043364, FBgn0261458
GO:0008361	regulation of cell size	4.29183e-05	FBgn0000723, FBgn0003716, FBgn0004009, FBgn0010113, FBgn0015609, FBgn0016797, FBgn0023172, FBgn0023215, FBgn0028386, FBgn0029944, FBgn0259176
GO:0035466	regulation of signaling pathway	4.31792e-05	FBgn0000097, FBgn0002973, FBgn0003177, FBgn0003371, FBgn0003390, FBgn0004569, FBgn0004644, FBgn0005672, FBgn0010575, FBgn0010825, FBgn0011591, FBgn0023172, FBgn0023214, FBgn0028509, FBgn0030842, FBgn0035142, FBgn0036558, FBgn0041184, FBgn0041604, FBgn0085403, FBgn0259176, FBgn0262127
GO:0007350	blastoderm segmentation	4.55344e-05	FBgn0001168, FBgn0001235, FBgn0002945, FBgn0003118, FBgn0003165, FBgn0003371, FBgn0003866, FBgn0004009, FBgn0004399, FBgn0004644, FBgn0004859, FBgn0011661, FBgn0033378, FBgn0041604, FBgn0086655, FBgn0260642
GO:0010646	regulation of cell communication	4.6602e-05	FBgn0000097, FBgn0002973, FBgn0003165, FBgn0003371, FBgn0004009, FBgn0004569, FBgn0004644, FBgn0005672, FBgn0010575, FBgn0010825, FBgn0011591, FBgn0035142, FBgn0036558, FBgn0039141, FBgn0041184, FBgn0041604, FBgn0259176
GO:0071840	cellular component organization or biogenesis	4.83245e-05	FBgn0000042, FBgn0000054, FBgn0000097, FBgn0000173, FBgn0000244, FBgn0000497, FBgn0000504, FBgn0000546, FBgn0000636, FBgn0000667, FBgn0000723, FBgn0001168, FBgn0002543, FBgn0002973, FBgn0003118, FBgn0003137, FBgn0003165, FBgn0003302, FBgn0003371, FBgn0003502, FBgn0003716, FBgn0003862, FBgn0004009, FBgn0004370, FBgn0004399, FBgn0004400, FBgn0004569, FBgn0004644, FBgn0004652, FBgn0004859, FBgn00048…
GO:0007479	leg disc proximal/distal pattern formation	5.06196e-05	FBgn0000157, FBgn0001235, FBgn0003866, FBgn0004009, FBgn0086655
GO:0009826	unidimensional cell growth	5.06196e-05	FBgn0000723, FBgn0003716, FBgn0004009, FBgn0023172, FBgn0029944
GO:0048638	regulation of developmental growth	6.14048e-05	FBgn0000504, FBgn0003165, FBgn0003371, FBgn0003716, FBgn0004583, FBgn0010575, FBgn0015609, FBgn0041604
GO:0008586	imaginal disc-derived wing vein morphogenesis	6.25196e-05	FBgn0000575, FBgn0003175, FBgn0003396, FBgn0010825, FBgn0011224, FBgn0035142, FBgn0041184
GO:0035288	anterior head segmentation	6.37854e-05	FBgn0001235, FBgn0004009, FBgn0004644, FBgn0260642
GO:0045570	regulation of imaginal disc growth	7.03422e-05	FBgn0000504, FBgn0003716, FBgn0004583, FBgn0010575, FBgn0041604
GO:0048859	formation of anatomical boundary	7.11079e-05	FBgn0000497, FBgn0001235, FBgn0002543, FBgn0002973, FBgn0003396, FBgn0003716, FBgn0003866, FBgn0005672
GO:0007367	segment polarity determination	7.15248e-05	FBgn0002945, FBgn0003371, FBgn0004009, FBgn0004644, FBgn0004859, FBgn0041604
GO:0051705	behavioral interaction between organisms	7.2315e-05	FBgn0000042, FBgn0000504, FBgn0000575, FBgn0003175, FBgn0003502, FBgn0004652, FBgn0005771, FBgn0010470, FBgn0030844, FBgn0031453, FBgn0036152, FBgn0086686
GO:0006928	cellular component movement	7.6055e-05	FBgn0000097, FBgn0000546, FBgn0002543, FBgn0002973, FBgn0003165, FBgn0003716, FBgn0003862, FBgn0004644, FBgn0005672, FBgn0015609, FBgn0016797, FBgn0017397, FBgn0039411, FBgn0086655, FBgn0250823, FBgn0259176
GO:0007611	learning or memory	7.62825e-05	FBgn0000054, FBgn0000546, FBgn0000636, FBgn0000721, FBgn0003165, FBgn0003371, FBgn0003396, FBgn0003502, FBgn0014141, FBgn0038934
GO:0050890	cognition	7.62825e-05	FBgn0000054, FBgn0000546, FBgn0000636, FBgn0000721, FBgn0003165, FBgn0003371, FBgn0003396, FBgn0003502, FBgn0014141, FBgn0038934
GO:0006807	nitrogen compound metabolic process	8.20165e-05	FBgn0000054, FBgn0000097, FBgn0000157, FBgn0000504, FBgn0000546, FBgn0000575, FBgn0001168, FBgn0001235, FBgn0002069, FBgn0003118, FBgn0003129, FBgn0003165, FBgn0003371, FBgn0003396, FBgn0003502, FBgn0003862, FBgn0003866, FBgn0004009, FBgn0004396, FBgn0004607, FBgn0004644, FBgn0004859, FBgn0004860, FBgn0004861, FBgn0004865, FBgn0004892, FBgn0004914, FBgn0005612, FBgn0005771, FBgn0010300, FBgn00103…
GO:0060560	developmental growth involved in morphogenesis	8.22261e-05	FBgn0000723, FBgn0003716, FBgn0004009, FBgn0010113, FBgn0015609, FBgn0016797, FBgn0023172, FBgn0029944
GO:0035217	labial disc development	8.41672e-05	FBgn0004009, FBgn0004644, FBgn0004859
GO:0016055	Wnt receptor signaling pathway	8.48217e-05	FBgn0002945, FBgn0003371, FBgn0003390, FBgn0004009, FBgn0016797, FBgn0020496, FBgn0031903, FBgn0035142, FBgn0041604, FBgn0250823
GO:0060284	regulation of cell development	8.51169e-05	FBgn0000097, FBgn0002973, FBgn0003165, FBgn0003371, FBgn0003716, FBgn0003997, FBgn0004009, FBgn0005672, FBgn0010300, FBgn0015609, FBgn0023172, FBgn0025641, FBgn0033378, FBgn0041184
GO:0007365	periodic partitioning	8.90739e-05	FBgn0001168, FBgn0002945, FBgn0003371, FBgn0004009, FBgn0004644, FBgn0004859, FBgn0041604
GO:0035051	cardiac cell differentiation	8.96659e-05	FBgn0000546, FBgn0002543, FBgn0002973, FBgn0003118, FBgn0004009, FBgn0016660
GO:0007422	peripheral nervous system development	9.4168e-05	FBgn0000546, FBgn0000575, FBgn0001235, FBgn0002973, FBgn0003118, FBgn0003396, FBgn0005672, FBgn0015371, FBgn0086680, FBgn0259176
GO:0035277	spiracle morphogenesis, open tracheal system	9.62998e-05	FBgn0004009, FBgn0004644, FBgn0004859, FBgn0005672, FBgn0023172
GO:0060911	cardiac cell fate commitment	9.62998e-05	FBgn0000546, FBgn0002543, FBgn0003118, FBgn0004009, FBgn0016660
GO:0007431	salivary gland development	9.81457e-05	FBgn0000546, FBgn0001168, FBgn0001235, FBgn0002543, FBgn0003396, FBgn0003502, FBgn0003716, FBgn0003866, FBgn0003997, FBgn0004396, FBgn0005672, FBgn0016797, FBgn0043364, FBgn0259176
GO:0035272	exocrine system development	9.81457e-05	FBgn0000546, FBgn0001168, FBgn0001235, FBgn0002543, FBgn0003396, FBgn0003502, FBgn0003716, FBgn0003866, FBgn0003997, FBgn0004396, FBgn0005672, FBgn0016797, FBgn0043364, FBgn0259176
GO:0007482	haltere development	0.000105467	FBgn0001235, FBgn0004569, FBgn0041184, FBgn0261238
GO:0007346	regulation of mitotic cell cycle	0.000111918	FBgn0003302, FBgn0004009, FBgn0004583, FBgn0004644, FBgn0004859, FBgn0010316, FBgn0024308, FBgn0028978, FBgn0031696, FBgn0041171, FBgn0261278
GO:0042048	olfactory behavior	0.000115457	FBgn0000054, FBgn0000636, FBgn0003371, FBgn0003396, FBgn0004399, FBgn0011661, FBgn0014141, FBgn0016930, FBgn0033073, FBgn0250876
GO:0032535	regulation of cellular component size	0.000119382	FBgn0000723, FBgn0003502, FBgn0003716, FBgn0004009, FBgn0010113, FBgn0015609, FBgn0016797, FBgn0023172, FBgn0023215, FBgn0028386, FBgn0029944, FBgn0259176
GO:0007448	anterior/posterior pattern formation, imaginal disc	0.000128462	FBgn0003396, FBgn0003716, FBgn0004009, FBgn0004644, FBgn0004859
GO:0001751	compound eye photoreceptor cell differentiation	0.000139694	FBgn0000097, FBgn0000575, FBgn0001168, FBgn0001235, FBgn0003118, FBgn0004583, FBgn0004644, FBgn0005672, FBgn0011661, FBgn0015609, FBgn0041184, FBgn0259176
GO:0001763	morphogenesis of a branching structure	0.000145072	FBgn0003118, FBgn0003177, FBgn0003716, FBgn0004009, FBgn0010113, FBgn0038755, FBgn0039411
GO:0035295	tube development	0.000145524	FBgn0000546, FBgn0001168, FBgn0002543, FBgn0003118, FBgn0003177, FBgn0004009, FBgn0010113, FBgn0015296, FBgn0016660, FBgn0038755, FBgn0039411
GO:0007391	dorsal closure	0.000154578	FBgn0000097, FBgn0000575, FBgn0000723, FBgn0003177, FBgn0003396, FBgn0003502, FBgn0003716, FBgn0004009, FBgn0029944, FBgn0043364
GO:0042981	regulation of apoptosis	0.000158496	FBgn0000097, FBgn0000546, FBgn0003118, FBgn0003997, FBgn0004009, FBgn0004569, FBgn0004583, FBgn0005672, FBgn0011704, FBgn0011766, FBgn0259176
GO:0003156	regulation of organ formation	0.000163462	FBgn0003396, FBgn0003716, FBgn0003866, FBgn0004009
GO:0035216	haltere disc development	0.000163572	FBgn0001235, FBgn0004569, FBgn0041184, FBgn0261238
GO:0048100	wing disc anterior/posterior pattern formation	0.000163572	FBgn0003396, FBgn0003716, FBgn0004644, FBgn0004859
GO:0010002	cardioblast differentiation	0.00016859	FBgn0000546, FBgn0002543, FBgn0003118, FBgn0004009, FBgn0016660
GO:0007635	chemosensory behavior	0.000170352	FBgn0000054, FBgn0000636, FBgn0003371, FBgn0003396, FBgn0004399, FBgn0011661, FBgn0014141, FBgn0016930, FBgn0033073, FBgn0250876
GO:0007626	locomotory behavior	0.000172908	FBgn0000054, FBgn0000173, FBgn0000546, FBgn0000575, FBgn0000667, FBgn0000721, FBgn0003371, FBgn0010575, FBgn0016076, FBgn0039141, FBgn0250876
GO:0001754	eye photoreceptor cell differentiation	0.000190265	FBgn0000097, FBgn0000575, FBgn0001168, FBgn0001235, FBgn0003118, FBgn0004583, FBgn0004644, FBgn0005672, FBgn0011661, FBgn0015609, FBgn0041184, FBgn0259176
GO:0010160	formation of organ boundary	0.000196681	FBgn0001235, FBgn0002543, FBgn0002973, FBgn0003396, FBgn0003716, FBgn0003866, FBgn0005672
GO:0010557	positive regulation of macromolecule biosynthetic process	0.000205032	FBgn0000054, FBgn0000504, FBgn0001235, FBgn0003165, FBgn0003862, FBgn0004859, FBgn0011766, FBgn0015371, FBgn0026160, FBgn0034667, FBgn0039411, FBgn0043364
GO:0016477	cell migration	0.000244753	FBgn0000097, FBgn0000546, FBgn0002543, FBgn0002973, FBgn0003165, FBgn0003716, FBgn0003862, FBgn0004644, FBgn0005672, FBgn0017397, FBgn0039411, FBgn0086655, FBgn0250823, FBgn0259176
GO:0007167	enzyme linked receptor protein signaling pathway	0.000260146	FBgn0003118, FBgn0003396, FBgn0003716, FBgn0004569, FBgn0004583, FBgn0005672, FBgn0010825, FBgn0015296, FBgn0023214, FBgn0038279, FBgn0038755, FBgn0041184, FBgn0041604, FBgn0259176
GO:0010467	gene expression	0.000275346	FBgn0000054, FBgn0000097, FBgn0000157, FBgn0000504, FBgn0000546, FBgn0000575, FBgn0001168, FBgn0001235, FBgn0002069, FBgn0003118, FBgn0003129, FBgn0003165, FBgn0003371, FBgn0003390, FBgn0003396, FBgn0003862, FBgn0003866, FBgn0004009, FBgn0004396, FBgn0004399, FBgn0004607, FBgn0004644, FBgn0004859, FBgn0004860, FBgn0004861, FBgn0004865, FBgn0004892, FBgn0004914, FBgn0005612, FBgn0005771, FBgn00101…
GO:0045941	positive regulation of transcription	0.000280018	FBgn0000054, FBgn0000504, FBgn0001235, FBgn0003862, FBgn0004859, FBgn0011766, FBgn0015371, FBgn0026160, FBgn0034667, FBgn0039411, FBgn0043364
GO:0035556	intracellular signal transduction	0.000285679	FBgn0000097, FBgn0003118, FBgn0003177, FBgn0003371, FBgn0003502, FBgn0004583, FBgn0004644, FBgn0023172, FBgn0023214, FBgn0024329, FBgn0028509, FBgn0029944, FBgn0030842, FBgn0041184, FBgn0043364, FBgn0083940, FBgn0085403, FBgn0261278, FBgn0262127
GO:0007379	segment specification	0.000337105	FBgn0001235, FBgn0003866, FBgn0010825, FBgn0011764, FBgn0086655, FBgn0260642
GO:0010564	regulation of cell cycle process	0.000345429	FBgn0003302, FBgn0004009, FBgn0004583, FBgn0004859, FBgn0010316, FBgn0028978, FBgn0031696, FBgn0041171, FBgn0260946, FBgn0261278
GO:0008589	regulation of smoothened signaling pathway	0.000345948	FBgn0003371, FBgn0003390, FBgn0004644, FBgn0010575, FBgn0041604
GO:0035017	cuticle pattern formation	0.000346182	FBgn0004009, FBgn0004396, FBgn0004859, FBgn0011591, FBgn0025641
GO:0045610	regulation of hemocyte differentiation	0.000346182	FBgn0000097, FBgn0003118, FBgn0003371, FBgn0004009, FBgn0014141
GO:0090066	regulation of anatomical structure size	0.000375044	FBgn0000497, FBgn0000723, FBgn0003502, FBgn0003716, FBgn0004009, FBgn0010113, FBgn0015609, FBgn0016797, FBgn0023172, FBgn0023215, FBgn0028386, FBgn0029944, FBgn0259176
GO:0045935	positive regulation of nucleobase, nucleoside, nucleotide and nucleic acid metabolic process	0.000380233	FBgn0000054, FBgn0000504, FBgn0001235, FBgn0003862, FBgn0004859, FBgn0011766, FBgn0015371, FBgn0026160, FBgn0034667, FBgn0039411, FBgn0043364
GO:0051173	positive regulation of nitrogen compound metabolic process	0.000380233	FBgn0000054, FBgn0000504, FBgn0001235, FBgn0003862, FBgn0004859, FBgn0011766, FBgn0015371, FBgn0026160, FBgn0034667, FBgn0039411, FBgn0043364
GO:0001738	morphogenesis of a polarized epithelium	0.00040959	FBgn0000097, FBgn0000497, FBgn0002945, FBgn0003118, FBgn0004009, FBgn0004569, FBgn0015609, FBgn0043364, FBgn0261873
GO:0007487	analia development	0.000416466	FBgn0000157, FBgn0000504, FBgn0004644
GO:0046958	nonassociative learning	0.00041675	FBgn0000721, FBgn0003371, FBgn0003502
GO:0060914	heart formation	0.00041675	FBgn0004009, FBgn0004644, FBgn0004859
GO:0048870	cell motility	0.000418712	FBgn0000097, FBgn0000546, FBgn0002543, FBgn0002973, FBgn0003165, FBgn0003716, FBgn0003862, FBgn0004644, FBgn0005672, FBgn0017397, FBgn0039411, FBgn0086655, FBgn0250823, FBgn0259176
GO:0008347	glial cell migration	0.000430474	FBgn0002973, FBgn0004644, FBgn0017397, FBgn0086655, FBgn0250823
GO:0006915	apoptosis	0.000473679	FBgn0000097, FBgn0000546, FBgn0003118, FBgn0003997, FBgn0004009, FBgn0004569, FBgn0004583, FBgn0005672, FBgn0011704, FBgn0011766, FBgn0086441, FBgn0259176
GO:0007380	specification of segmental identity, head	0.000474311	FBgn0001235, FBgn0003866, FBgn0086655, FBgn0260642
GO:0010628	positive regulation of gene expression	0.000475109	FBgn0000054, FBgn0000504, FBgn0001235, FBgn0003862, FBgn0004859, FBgn0011766, FBgn0015371, FBgn0026160, FBgn0034667, FBgn0039411, FBgn0043364
GO:0010648	negative regulation of cell communication	0.000475109	FBgn0000097, FBgn0002973, FBgn0003371, FBgn0004009, FBgn0004569, FBgn0010575, FBgn0010825, FBgn0011591, FBgn0041184, FBgn0041604, FBgn0259176
GO:0001752	compound eye photoreceptor fate commitment	0.000503646	FBgn0000097, FBgn0000575, FBgn0001168, FBgn0001235, FBgn0003118, FBgn0004644, FBgn0041184
GO:0007173	epidermal growth factor receptor signaling pathway	0.00050399	FBgn0003118, FBgn0004569, FBgn0005672, FBgn0010825, FBgn0015296, FBgn0023214, FBgn0041184
GO:0042706	eye photoreceptor cell fate commitment	0.00050399	FBgn0000097, FBgn0000575, FBgn0001168, FBgn0001235, FBgn0003118, FBgn0004644, FBgn0041184
GO:0043067	regulation of programmed cell death	0.000511139	FBgn0000097, FBgn0000546, FBgn0003118, FBgn0003997, FBgn0004009, FBgn0004569, FBgn0004583, FBgn0005672, FBgn0011704, FBgn0011766, FBgn0259176
GO:0031325	positive regulation of cellular metabolic process	0.000575999	FBgn0000054, FBgn0000504, FBgn0001235, FBgn0003165, FBgn0003862, FBgn0004583, FBgn0004859, FBgn0011766, FBgn0015371, FBgn0026160, FBgn0034667, FBgn0039411, FBgn0043364
GO:0051674	localization of cell	0.000618772	FBgn0000097, FBgn0000546, FBgn0002543, FBgn0002973, FBgn0003165, FBgn0003716, FBgn0003862, FBgn0004644, FBgn0005672, FBgn0017397, FBgn0039411, FBgn0086655, FBgn0250823, FBgn0259176
GO:0008101	decapentaplegic receptor signaling pathway	0.000637655	FBgn0003716, FBgn0004583, FBgn0041604, FBgn0259176
GO:0022407	regulation of cell-cell adhesion	0.000638093	FBgn0000097, FBgn0002543, FBgn0003716, FBgn0004569
GO:0035289	posterior head segmentation	0.000638532	FBgn0001168, FBgn0004009, FBgn0004644, FBgn0086655
GO:0042023	DNA endoreduplication	0.000638971	FBgn0003502, FBgn0004009, FBgn0011766, FBgn0041171
GO:0042684	cardioblast cell fate commitment	0.000638971	FBgn0002543, FBgn0003118, FBgn0004009, FBgn0016660
GO:0007612	learning	0.000642068	FBgn0000054, FBgn0000636, FBgn0000721, FBgn0003371, FBgn0003396, FBgn0003502, FBgn0014141
GO:0046552	photoreceptor cell fate commitment	0.000642068	FBgn0000097, FBgn0000575, FBgn0001168, FBgn0001235, FBgn0003118, FBgn0004644, FBgn0041184
GO:0042058	regulation of epidermal growth factor receptor signaling pathway	0.000645723	FBgn0004569, FBgn0005672, FBgn0010825, FBgn0023214, FBgn0041184
GO:0007420	brain development	0.000660893	FBgn0000042, FBgn0000546, FBgn0000575, FBgn0001235, FBgn0002543, FBgn0004644, FBgn0010300, FBgn0029092, FBgn0086680, FBgn0250876
GO:0001736	establishment of planar polarity	0.000684689	FBgn0000097, FBgn0000497, FBgn0002945, FBgn0003118, FBgn0004009, FBgn0004569, FBgn0015609, FBgn0043364
GO:0007219	Notch signaling pathway	0.000684689	FBgn0002973, FBgn0003371, FBgn0011224, FBgn0011591, FBgn0031458, FBgn0035142, FBgn0036558, FBgn0259176
GO:0010604	positive regulation of macromolecule metabolic process	0.000699957	FBgn0000054, FBgn0000504, FBgn0001235, FBgn0003165, FBgn0003862, FBgn0004859, FBgn0011766, FBgn0015371, FBgn0026160, FBgn0034667, FBgn0039411, FBgn0043364
GO:0048754	branching morphogenesis of a tube	0.000731433	FBgn0003118, FBgn0003177, FBgn0004009, FBgn0010113, FBgn0038755, FBgn0039411
GO:0060446	branching involved in open tracheal system development	0.00073194	FBgn0003118, FBgn0003177, FBgn0004009, FBgn0010113, FBgn0038755, FBgn0039411
GO:0061138	morphogenesis of a branching epithelium	0.00073194	FBgn0003118, FBgn0003177, FBgn0004009, FBgn0010113, FBgn0038755, FBgn0039411
GO:0007164	establishment of tissue polarity	0.000755486	FBgn0000097, FBgn0000497, FBgn0002945, FBgn0003118, FBgn0004009, FBgn0004569, FBgn0015609, FBgn0043364
GO:0008544	epidermis development	0.000809233	FBgn0000497, FBgn0000546, FBgn0003866, FBgn0004009, FBgn0004644, FBgn0004859, FBgn0016076
GO:0065008	regulation of biological quality	0.000824697	FBgn0000042, FBgn0000244, FBgn0000497, FBgn0000667, FBgn0000723, FBgn0003165, FBgn0003371, FBgn0003390, FBgn0003502, FBgn0003716, FBgn0004009, FBgn0010113, FBgn0011661, FBgn0015221, FBgn0015609, FBgn0016797, FBgn0017397, FBgn0023172, FBgn0023215, FBgn0025641, FBgn0025803, FBgn0028386, FBgn0029944, FBgn0030329, FBgn0030608, FBgn0035142, FBgn0036490, FBgn0037498, FBgn0039141, FBgn0259176, FBgn02609…
GO:0035239	tube morphogenesis	0.000831372	FBgn0001168, FBgn0002543, FBgn0003118, FBgn0003177, FBgn0004009, FBgn0010113, FBgn0015296, FBgn0038755, FBgn0039411
GO:0008258	head involution	0.00084147	FBgn0000546, FBgn0000575, FBgn0003165, FBgn0003502, FBgn0003866, FBgn0003997
GO:0008345	larval locomotory behavior	0.000844093	FBgn0000054, FBgn0000546, FBgn0000721, FBgn0010575
GO:0035290	trunk segmentation	0.000844093	FBgn0001168, FBgn0003866, FBgn0004009, FBgn0004644
GO:0060233	oenocyte delamination	0.000854675	FBgn0000097, FBgn0004569
GO:0007616	long-term memory	0.000933977	FBgn0000054, FBgn0000546, FBgn0000721, FBgn0003165, FBgn0038934
GO:0031328	positive regulation of cellular biosynthetic process	0.000950652	FBgn0000054, FBgn0000504, FBgn0001235, FBgn0003165, FBgn0003862, FBgn0004859, FBgn0011766, FBgn0015371, FBgn0026160, FBgn0034667, FBgn0039411, FBgn0043364
GO:0009893	positive regulation of metabolic process	0.000968095	FBgn0000054, FBgn0000504, FBgn0001235, FBgn0003165, FBgn0003862, FBgn0004583, FBgn0004859, FBgn0011766, FBgn0015371, FBgn0026160, FBgn0034667, FBgn0039411, FBgn0043364
GO:0009891	positive regulation of biosynthetic process	0.00100857	FBgn0000054, FBgn0000504, FBgn0001235, FBgn0003165, FBgn0003862, FBgn0004859, FBgn0011766, FBgn0015371, FBgn0026160, FBgn0034667, FBgn0039411, FBgn0043364
GO:0010941	regulation of cell death	0.00107718	FBgn0000097, FBgn0000546, FBgn0003118, FBgn0003997, FBgn0004009, FBgn0004569, FBgn0004583, FBgn0005672, FBgn0011704, FBgn0011766, FBgn0259176
GO:0035467	negative regulation of signaling pathway	0.0011036	FBgn0000097, FBgn0002973, FBgn0003371, FBgn0004569, FBgn0010575, FBgn0010825, FBgn0011591, FBgn0041184, FBgn0041604, FBgn0259176
GO:0007458	progression of morphogenetic furrow involved in compound eye morphogenesis	0.00115515	FBgn0000575, FBgn0004644, FBgn0015371
GO:0007488	histoblast morphogenesis	0.00115596	FBgn0000546, FBgn0003716, FBgn0010316
GO:0035221	genital disc pattern formation	0.00115677	FBgn0004009, FBgn0004644, FBgn0004859
GO:0035224	genital disc anterior/posterior pattern formation	0.00115758	FBgn0004009, FBgn0004644, FBgn0004859
GO:0045704	regulation of salivary gland boundary specification	0.00115839	FBgn0003396, FBgn0003716, FBgn0003866
GO:0045705	negative regulation of salivary gland boundary specification	0.00115839	FBgn0003396, FBgn0003716, FBgn0003866
GO:0051960	regulation of nervous system development	0.00118684	FBgn0000097, FBgn0002973, FBgn0003165, FBgn0003371, FBgn0003716, FBgn0010300, FBgn0015609, FBgn0023172, FBgn0025641, FBgn0041184
GO:0007163	establishment or maintenance of cell polarity	0.00120386	FBgn0000097, FBgn0000497, FBgn0003118, FBgn0003177, FBgn0004009, FBgn0004569, FBgn0011224, FBgn0011661, FBgn0015609, FBgn0260946, FBgn0261458, FBgn0261873
GO:0007548	sex differentiation	0.00125036	FBgn0000157, FBgn0000504, FBgn0003502, FBgn0004009, FBgn0004644, FBgn0004652, FBgn0016797
GO:0022416	bristle development	0.00125124	FBgn0000575, FBgn0001168, FBgn0003371, FBgn0016076, FBgn0016797, FBgn0020496, FBgn0261458
GO:0048663	neuron fate commitment	0.00125124	FBgn0000097, FBgn0000575, FBgn0001168, FBgn0001235, FBgn0003118, FBgn0004644, FBgn0041184
GO:0007224	smoothened signaling pathway	0.00125417	FBgn0003371, FBgn0003390, FBgn0004644, FBgn0004859, FBgn0010575, FBgn0041604
GO:0044249	cellular biosynthetic process	0.00131295	FBgn0000054, FBgn0000097, FBgn0000157, FBgn0000504, FBgn0000546, FBgn0000575, FBgn0001168, FBgn0001235, FBgn0002069, FBgn0003118, FBgn0003129, FBgn0003165, FBgn0003371, FBgn0003396, FBgn0003502, FBgn0003862, FBgn0003866, FBgn0004009, FBgn0004396, FBgn0004607, FBgn0004644, FBgn0004859, FBgn0004860, FBgn0004861, FBgn0004865, FBgn0004892, FBgn0004914, FBgn0005612, FBgn0005771, FBgn0010300, FBgn00103…
GO:0002164	larval development	0.00131517	FBgn0003129, FBgn0004009, FBgn0004396, FBgn0004644, FBgn0011661, FBgn0014141, FBgn0028369, FBgn0261238
GO:0008407	bristle morphogenesis	0.00141835	FBgn0000575, FBgn0001168, FBgn0003371, FBgn0016076, FBgn0016797, FBgn0261458
GO:0045786	negative regulation of cell cycle	0.00159643	FBgn0003165, FBgn0004583, FBgn0010316, FBgn0028978, FBgn0031696, FBgn0261278
GO:0023034	intracellular signaling pathway	0.00165455	FBgn0000097, FBgn0000546, FBgn0003118, FBgn0003177, FBgn0003371, FBgn0003502, FBgn0004583, FBgn0004644, FBgn0015296, FBgn0023172, FBgn0023214, FBgn0024329, FBgn0028509, FBgn0029944, FBgn0030842, FBgn0041184, FBgn0043364, FBgn0083940, FBgn0085403, FBgn0261278, FBgn0262127
GO:0035146	tube fusion	0.00171895	FBgn0003177, FBgn0004009, FBgn0010113, FBgn0039411
GO:0035147	branch fusion, open tracheal system	0.00172017	FBgn0003177, FBgn0004009, FBgn0010113, FBgn0039411
GO:0045465	R8 cell differentiation	0.00172017	FBgn0000575, FBgn0001168, FBgn0004644, FBgn0015609
GO:0003007	heart morphogenesis	0.00172278	FBgn0004009, FBgn0004644, FBgn0004859
GO:0007513	pericardial cell differentiation	0.00172401	FBgn0002973, FBgn0003118, FBgn0004009
GO:0042685	cardioblast cell fate specification	0.00172524	FBgn0002543, FBgn0003118, FBgn0004009
GO:0060912	cardiac cell fate specification	0.00172524	FBgn0002543, FBgn0003118, FBgn0004009
GO:0045893	positive regulation of transcription, DNA-dependent	0.00183928	FBgn0000504, FBgn0001235, FBgn0003862, FBgn0004859, FBgn0015371, FBgn0026160, FBgn0034667, FBgn0039411
GO:0044260	cellular macromolecule metabolic process	0.00191222	FBgn0000054, FBgn0000097, FBgn0000157, FBgn0000173, FBgn0000497, FBgn0000504, FBgn0000546, FBgn0000575, FBgn0000721, FBgn0000723, FBgn0001168, FBgn0001235, FBgn0002069, FBgn0003118, FBgn0003129, FBgn0003165, FBgn0003371, FBgn0003396, FBgn0003502, FBgn0003716, FBgn0003862, FBgn0003866, FBgn0003997, FBgn0004009, FBgn0004370, FBgn0004396, FBgn0004607, FBgn0004644, FBgn0004859, FBgn0004860, FBgn00048…
GO:0051254	positive regulation of RNA metabolic process	0.00199247	FBgn0000504, FBgn0001235, FBgn0003862, FBgn0004859, FBgn0015371, FBgn0026160, FBgn0034667, FBgn0039411
GO:0045944	positive regulation of transcription from RNA polymerase II promoter	0.0020179	FBgn0000504, FBgn0001235, FBgn0004859, FBgn0015371, FBgn0034667, FBgn0039411
GO:0042127	regulation of cell proliferation	0.00204112	FBgn0003396, FBgn0004009, FBgn0004583, FBgn0004644, FBgn0010300, FBgn0011766, FBgn0259176
GO:0030155	regulation of cell adhesion	0.00212063	FBgn0000097, FBgn0002543, FBgn0003716, FBgn0004569
GO:0009952	anterior/posterior pattern formation	0.00234267	FBgn0000546, FBgn0003118, FBgn0003165, FBgn0003396, FBgn0003716, FBgn0004009, FBgn0004399, FBgn0004644, FBgn0004859, FBgn0011661, FBgn0033378
GO:0006338	chromatin remodeling	0.00238291	FBgn0003862, FBgn0011764, FBgn0026160, FBgn0033636, FBgn0086916
GO:0007412	axon target recognition	0.00243353	FBgn0000173, FBgn0010575, FBgn0015609
GO:0007445	determination of imaginal disc primordium	0.00243527	FBgn0003118, FBgn0004009, FBgn0005672
GO:0007485	imaginal disc-derived male genitalia development	0.00243702	FBgn0000157, FBgn0000504, FBgn0003502
GO:0035225	determination of genital disc primordium	0.00243702	FBgn0003118, FBgn0004009, FBgn0005672
GO:0051017	actin filament bundle assembly	0.00257818	FBgn0000667, FBgn0000723, FBgn0004009, FBgn0025641
GO:0007383	specification of segmental identity, antennal segment	0.00260024	FBgn0001235, FBgn0260642
GO:0010092	specification of organ identity	0.00260211	FBgn0000157, FBgn0001235
GO:0046959	habituation	0.00260211	FBgn0000721, FBgn0003371
GO:0014016	neuroblast differentiation	0.00274012	FBgn0002945, FBgn0002973, FBgn0004009, FBgn0010300, FBgn0260642
GO:0045926	negative regulation of growth	0.00274012	FBgn0003371, FBgn0004583, FBgn0023215, FBgn0028386, FBgn0041171
GO:0010942	positive regulation of cell death	0.00280306	FBgn0000097, FBgn0000546, FBgn0003997, FBgn0004009, FBgn0004569, FBgn0011766
GO:0042067	establishment of ommatidial planar polarity	0.00280508	FBgn0000097, FBgn0000497, FBgn0003118, FBgn0004009, FBgn0004569, FBgn0015609
GO:0043068	positive regulation of programmed cell death	0.00280508	FBgn0000097, FBgn0000546, FBgn0003997, FBgn0004009, FBgn0004569, FBgn0011766
GO:0051704	multi-organism process	0.00281159	FBgn0000042, FBgn0000504, FBgn0000575, FBgn0003175, FBgn0003502, FBgn0004652, FBgn0005771, FBgn0010470, FBgn0011764, FBgn0011766, FBgn0030844, FBgn0031453, FBgn0031464, FBgn0036152, FBgn0036154, FBgn0086686
GO:0007154	cell communication	0.0028736	FBgn0000097, FBgn0000173, FBgn0002973, FBgn0003165, FBgn0003371, FBgn0003716, FBgn0004009, FBgn0004569, FBgn0004644, FBgn0005672, FBgn0010575, FBgn0010825, FBgn0011591, FBgn0015609, FBgn0017397, FBgn0035142, FBgn0036558, FBgn0039141, FBgn0041184, FBgn0041604, FBgn0259176, FBgn0260946
GO:0009058	biosynthetic process	0.0030594	FBgn0000054, FBgn0000097, FBgn0000157, FBgn0000504, FBgn0000546, FBgn0000575, FBgn0001168, FBgn0001235, FBgn0002069, FBgn0003118, FBgn0003129, FBgn0003165, FBgn0003371, FBgn0003396, FBgn0003502, FBgn0003862, FBgn0003866, FBgn0004009, FBgn0004396, FBgn0004607, FBgn0004644, FBgn0004859, FBgn0004860, FBgn0004861, FBgn0004865, FBgn0004892, FBgn0004914, FBgn0005612, FBgn0005771, FBgn0010300, FBgn00103…
GO:0031098	stress-activated protein kinase signaling cascade	0.00311056	FBgn0000097, FBgn0003177, FBgn0003371, FBgn0003502, FBgn0029944, FBgn0043364
GO:0043065	positive regulation of apoptosis	0.00313201	FBgn0000097, FBgn0000546, FBgn0003997, FBgn0004569, FBgn0011766
GO:0007096	regulation of exit from mitosis	0.00332333	FBgn0003302, FBgn0004583, FBgn0041171
GO:0007394	dorsal closure, elongation of leading edge cells	0.00332575	FBgn0000723, FBgn0004009, FBgn0029944
GO:0007484	imaginal disc-derived genitalia development	0.00332817	FBgn0000157, FBgn0000504, FBgn0003502
GO:0010458	exit from mitosis	0.00333059	FBgn0003302, FBgn0004583, FBgn0041171
GO:0035153	epithelial cell type specification, open tracheal system	0.00333301	FBgn0003177, FBgn0004009, FBgn0010113
GO:0035567	non-canonical Wnt receptor signaling pathway	0.00333301	FBgn0002945, FBgn0004009, FBgn0031903
GO:0042386	hemocyte differentiation	0.00356197	FBgn0000097, FBgn0003118, FBgn0003371, FBgn0004009, FBgn0014141
GO:0007243	intracellular protein kinase cascade	0.00366245	FBgn0000097, FBgn0003177, FBgn0003371, FBgn0003502, FBgn0024329, FBgn0029944, FBgn0041184, FBgn0043364
GO:0023014	signal transmission via phosphorylation event	0.00366245	FBgn0000097, FBgn0003177, FBgn0003371, FBgn0003502, FBgn0024329, FBgn0029944, FBgn0041184, FBgn0043364
GO:0010948	negative regulation of cell cycle process	0.00371959	FBgn0004009, FBgn0010316, FBgn0028978, FBgn0031696
GO:0045747	positive regulation of Notch signaling pathway	0.00437287	FBgn0011591, FBgn0035142, FBgn0036558
GO:0007165	signal transduction	0.0044987	FBgn0000097, FBgn0003118, FBgn0003177, FBgn0003371, FBgn0003502, FBgn0004583, FBgn0004644, FBgn0004646, FBgn0016797, FBgn0023172, FBgn0023214, FBgn0024329, FBgn0028509, FBgn0029944, FBgn0030842, FBgn0031696, FBgn0036257, FBgn0036518, FBgn0039411, FBgn0041184, FBgn0043364, FBgn0083940, FBgn0085403, FBgn0261278, FBgn0262127
GO:0007155	cell adhesion	0.00499106	FBgn0000097, FBgn0000497, FBgn0000546, FBgn0000636, FBgn0002543, FBgn0003118, FBgn0003177, FBgn0003716, FBgn0004569, FBgn0015609, FBgn0028369, FBgn0036101
GO:0035214	eye-antennal disc development	0.00501911	FBgn0000157, FBgn0003118, FBgn0003302, FBgn0003997, FBgn0004569, FBgn0005771
GO:0008593	regulation of Notch signaling pathway	0.00506913	FBgn0002973, FBgn0011591, FBgn0035142, FBgn0036558, FBgn0259176
GO:0061061	muscle structure development	0.00518193	FBgn0000097, FBgn0000546, FBgn0002973, FBgn0003118, FBgn0003129, FBgn0003165, FBgn0003371, FBgn0003716, FBgn0004009, FBgn0004652, FBgn0017397, FBgn0028369, FBgn0035539
GO:0021953	central nervous system neuron differentiation	0.0052176	FBgn0004644, FBgn0004861
GO:0021954	central nervous system neuron development	0.00522143	FBgn0004644, FBgn0004861
GO:0035329	hippo signaling cascade	0.00522143	FBgn0004583, FBgn0262127
GO:0007370	ventral furrow formation	0.00561453	FBgn0023172, FBgn0028978, FBgn0036257
GO:0035111	leg joint morphogenesis	0.00561867	FBgn0004892, FBgn0004893, FBgn0011591
GO:0045597	positive regulation of cell differentiation	0.00562281	FBgn0000097, FBgn0004009, FBgn0004859
GO:0048806	genitalia development	0.00562281	FBgn0000157, FBgn0000504, FBgn0003502
GO:0045466	R7 cell differentiation	0.00568749	FBgn0000097, FBgn0000575, FBgn0003118, FBgn0015609, FBgn0041184
GO:0010551	regulation of gene-specific transcription from RNA polymerase II promoter	0.00596825	FBgn0001235, FBgn0010575, FBgn0011766, FBgn0039411
GO:0032569	gene-specific transcription from RNA polymerase II promoter	0.00596825	FBgn0001235, FBgn0010575, FBgn0011766, FBgn0039411
GO:0032583	regulation of gene-specific transcription	0.0063324	FBgn0001168, FBgn0001235, FBgn0010575, FBgn0011766, FBgn0039411
GO:0016318	ommatidial rotation	0.00687184	FBgn0000497, FBgn0004009, FBgn0004569, FBgn0015609
GO:0007460	R8 cell fate commitment	0.00705286	FBgn0000575, FBgn0001168, FBgn0004644
GO:0008284	positive regulation of cell proliferation	0.0070581	FBgn0004009, FBgn0011766, FBgn0259176
GO:0045467	R7 cell development	0.00706334	FBgn0000097, FBgn0003118, FBgn0015609
GO:0051098	regulation of binding	0.00706858	FBgn0000575, FBgn0004644, FBgn0011764
GO:0051101	regulation of DNA binding	0.00706858	FBgn0000575, FBgn0004644, FBgn0011764
GO:0009966	regulation of signal transduction	0.00713846	FBgn0000097, FBgn0003177, FBgn0003371, FBgn0004583, FBgn0023172, FBgn0023214, FBgn0028509, FBgn0030842, FBgn0041184, FBgn0085403, FBgn0262127
GO:0023051	regulation of signaling process	0.00713846	FBgn0000097, FBgn0003177, FBgn0003371, FBgn0004583, FBgn0023172, FBgn0023214, FBgn0028509, FBgn0030842, FBgn0041184, FBgn0085403, FBgn0262127
GO:0007613	memory	0.00779534	FBgn0000054, FBgn0000546, FBgn0000721, FBgn0003165, FBgn0038934
GO:0007156	homophilic cell adhesion	0.00791048	FBgn0000497, FBgn0000636, FBgn0015609, FBgn0028369
GO:0045197	establishment or maintenance of epithelial cell apical/basal polarity	0.00791048	FBgn0000497, FBgn0011661, FBgn0260946, FBgn0261873
GO:0022610	biological adhesion	0.00804374	FBgn0000097, FBgn0000497, FBgn0000546, FBgn0000636, FBgn0002543, FBgn0003118, FBgn0003177, FBgn0003716, FBgn0004569, FBgn0015609, FBgn0028369, FBgn0036101
GO:0016265	death	0.00852542	FBgn0000097, FBgn0000546, FBgn0003118, FBgn0003997, FBgn0004009, FBgn0004569, FBgn0004583, FBgn0005672, FBgn0011704, FBgn0011766, FBgn0043364, FBgn0044452, FBgn0086441, FBgn0259176
GO:0007523	larval visceral muscle development	0.00869628	FBgn0004009, FBgn0028369
GO:0031099	regeneration	0.00870279	FBgn0036101, FBgn0086655
GO:0035263	genital disc sexually dimorphic development	0.00870931	FBgn0000504, FBgn0004009
GO:0042246	tissue regeneration	0.00871584	FBgn0036101, FBgn0086655
GO:0090254	cell elongation involved in imaginal disc-derived wing morphogenesis	0.00871584	FBgn0003716, FBgn0023172
GO:0042059	negative regulation of epidermal growth factor receptor signaling pathway	0.00875434	FBgn0004569, FBgn0010825, FBgn0041184
GO:0048056	R3/R4 cell differentiation	0.00875434	FBgn0000097, FBgn0000575, FBgn0003118
GO:0016476	regulation of embryonic cell shape	0.00905474	FBgn0000723, FBgn0004009, FBgn0023172, FBgn0029944
GO:0050767	regulation of neurogenesis	0.00912808	FBgn0000097, FBgn0002973, FBgn0010300, FBgn0015609, FBgn0023172, FBgn0025641, FBgn0041184
GO:0007178	transmembrane receptor protein serine/threonine kinase signaling pathway	0.00952426	FBgn0003396, FBgn0003716, FBgn0004583, FBgn0041604, FBgn0259176
GO:0007015	actin filament organization	0.00954353	FBgn0000667, FBgn0000723, FBgn0003502, FBgn0004009, FBgn0014141, FBgn0023172, FBgn0025641, FBgn0261458
GO:0002682	regulation of immune system process	0.00986081	FBgn0000097, FBgn0003118, FBgn0003371, FBgn0004009, FBgn0011764, FBgn0014141
GO:0035468	positive regulation of signaling pathway	0.00986825	FBgn0004644, FBgn0005672, FBgn0011591, FBgn0035142, FBgn0036558, FBgn0041604
GO:0045995	regulation of embryonic development	0.00986825	FBgn0000723, FBgn0004009, FBgn0023172, FBgn0029944, FBgn0033378, FBgn0261278
GO:0006412	translation	0.999498	FBgn0002069, FBgn0003165, FBgn0010300, FBgn0011224, FBgn0029664
