# Supplementary material for: Genome-Wide Tissue-Specific Occupancy of the Hox Protein Ultrabithorax and Hox Cofactor Homothorax in Drosophila
Source: PLoS One. 2011 Apr 5;6(4):e14686. doi: 10.1371/journal.pone.0014686 (PMC3071676; doi:10.1371/journal.pone.0014686)
Supplement: Table S3 — Medium confidence Ubx haltere peaks and target genes (Slattery et al., Choo et al.) All Ubx haltere peaks called in this study that also overlap a top 20% Ubx peak (TAS p-value) called from the Choo et al. data. Called target gene(s) associated with each peak are also indicated. (0.36 MB XLS) [file pone.0014686.s008.xls]

## Sheet: Haltere_Ubx_Medium-Confidence
Haltere, Ubx, Medium Confidence
Chromosome	Peak Start	Peak Stop	FBID	Gene
2L	21359	21666	FBgn0002121	l(2)gl-RF
2L	66518	66670	FBgn0067779	dbr-RB
2L	88445	88645	FBgn0002931	net-RB
2L	107268	107615	FBgn0005278;FBgn0005278	M(2)21AB-RB;M(2)21AB-RA
2L	159549	159980	FBgn0016977	spen-RA
2L	160282	161770	FBgn0016977	spen-RA
2L	166196	166742	FBgn0016977	spen-RA
2L	204937	207437	FBgn0031232	CG11617-RA
2L	221499	222418	FBgn0086902	kis-RB
2L	223093	223208	FBgn0086902	kis-RB
2L	223796	224335	FBgn0086902	kis-RB
2L	248018	248139	FBgn0086902;FBgn0086902	kis-RA;kis-RC
2L	250661	250895	FBgn0086902;FBgn0086902	kis-RA;kis-RC
2L	272537	273086	FBgn0086912	mbm-RA
2L	274019	274638	FBgn0086856	CG11555-RA
2L	283940	284100	FBgn0031244	CG11601-RA
2L	284615	285603	FBgn0031245	CG3625-RB
2L	286148	286653	FBgn0031245	CG3625-RA
2L	287742	288876	FBgn0025686	CG11592-RA
2L	290186	290619	FBgn0031245	CG3625-RC
2L	292373	292810	FBgn0031247	CG11562-RA
2L	294385	294583	FBgn0017457	U2af38-RA
2L	421282	421471	FBgn0031254	CG13692-RA
2L	421987	422267	FBgn0031254	CG13692-RA
2L	427159	427442	FBgn0031255	BBS8-RA
2L	428861	429992	FBgn0004583	ex-RA
2L	430372	430660	FBgn0004583	ex-RA
2L	431407	431594	FBgn0004583	ex-RA
2L	431942	432149	FBgn0004583	ex-RA
2L	438709	439755	FBgn0004583	ex-RA
2L	439921	442435	FBgn0004583	ex-RA
2L	533708	534027	FBgn0010602;FBgn0010602	lwr-RA;lwr-RB
2L	618221	618383	FBgn0040106	lectin-21Cb-RA
2L	633041	633157	FBgn0031273	CG2839-RA
2L	633514	634099	FBgn0031273	CG2839-RA
2L	634870	635449	FBgn0031273	CG2839-RA
2L	669715	669835	FBgn0031273	CG2839-RA
2L	670340	670714	FBgn0000497	ds-RA
2L	696638	696842	FBgn0000497	ds-RA
2L	714824	715251	FBgn0000497	ds-RA
2L	817087	817632	FBgn0031283	CG15880-RA
2L	818571	818686	FBgn0031284	CG3876-RA
2L	825224	825647	FBgn0010583;FBgn0010583;FBgn0010583	dock-RA;dock-RB;dock-RC
2L	867554	868130	FBgn0029095	aru-RC
2L	1063026	1063183	FBgn0003310	S-RB
2L	1065209	1065398	FBgn0003310	S-RB
2L	1108870	1109385	FBgn0031301	CG14339-RA
2L	1158184	1158551	FBgn0028388	capt-RA
2L	1162808	1163125	FBgn0031313	CG5080-RA
2L	1163235	1163843	FBgn0031313	CG5080-RB
2L	1164270	1164426	FBgn0031314	CG4785-RA
2L	1166697	1166960	FBgn0031315;FBgn0031315	CG14341-RA;CG14341-RB
2L	1172297	1172649	FBgn0031317	CG5118-RA
2L	1186222	1186608	FBgn0031322	CG5001-RA
2L	1404934	1405305	FBgn0002543	lea-RA
2L	1424980	1425815	FBgn0002543	lea-RA
2L	1426238	1427375	FBgn0002543	lea-RA
2L	1667454	1668758	FBgn0086758;FBgn0086758;FBgn0086758	chinmo-RA;chinmo-RB;chinmo-RC
2L	1981682	1981799	FBgn0031378	CG15362-RA
2L	1981958	1982157	FBgn0031379	CG7289-RA
2L	2009962	2010352	FBgn0031384	CG4238-RF
2L	2145464	2145774	FBgn0031390;FBgn0031390	tho2-RA;tho2-RB
2L	2146086	2147111	FBgn0031391	CG11723-RA
2L	2147808	2148121	FBgn0027509	CG7261-RA
2L	2162544	2162935	FBgn0000097	aop-RA
2L	2163046	2163735	FBgn0000097	aop-RA
2L	2175352	2175668	FBgn0000097	aop-RB
2L	2192190	2193011	FBgn0085201	CG34172-RA
2L	2195814	2195967	FBgn0085201	CG34172-RA
2L	2213723	2214961	FBgn0085203	CG34174-RA
2L	2215500	2216117	FBgn0031398	CG10880-RA
2L	2216507	2217166	FBgn0040715;FBgn0259717	CG15386-RA;CG42371-RA
2L	2217524	2217799	FBgn0031399	mio-RA
2L	2220659	2221416	FBgn0031401	CG7082-RA
2L	2226301	2226501	FBgn0031403	CG15387-RA
2L	2372767	2372995	FBgn0031418	CG3609-RA
2L	2374434	2375955	FBgn0031419	CG15390-RA
2L	2381268	2381422	FBgn0031421	CG9867-RA
2L	2482561	2482688	FBgn0031429	CG15393-RA
2L	2483232	2483354	FBgn0031429	CG15393-RA
2L	2483791	2484114	FBgn0031429	CG15393-RA
2L	2574540	2574847	FBgn0026778;FBgn0085343	Rad1-RA;CG34314-RA
2L	2577052	2577631	FBgn0031435	CG9883-RA
2L	2759794	2760081	FBgn0031456	Trn-SR-RA
2L	2769604	2770080	FBgn0031459	CG2862-RA
2L	2770197	2770315	FBgn0031459	CG2862-RB
2L	2857343	2857579	FBgn0031474;FBgn0031474	CG2991-RB;CG2991-RA
2L	2877735	2878553	FBgn0031479	Prx6005-RA
2L	2885206	2886084	FBgn0024947	NTPase-RD
2L	2968899	2969056	FBgn0024920	Ts-RA
2L	2976622	2977058	FBgn0031483	CG9641-RB
2L	2977520	2978095	FBgn0031484	CG3165-RA
2L	2993032	2993298	FBgn0025681;FBgn0025681;FBgn0025681	CG3558-RA;CG3558-RB;CG3558-RC
2L	2998884	2999409	FBgn0025681;FBgn0025681;FBgn0025681	CG3558-RA;CG3558-RB;CG3558-RC
2L	3000316	3000750	FBgn0025681;FBgn0025681;FBgn0025681	CG3558-RA;CG3558-RB;CG3558-RC
2L	3029258	3030350	FBgn0031494	CG17219-RA
2L	3037389	3037693	FBgn0031498	CG17260-RA
2L	3039027	3039454	FBgn0243513	cnir-RA
2L	3039644	3040327	FBgn0031500	CG17221-RB
2L	3107479	3107591	FBgn0015600	toc-RE
2L	3144697	3145751	FBgn0031505	CG12400-RA
2L	3170094	3172751	FBgn0085435	CG34406-RA
2L	3346549	3346700	FBgn0020445;FBgn0020445	E23-RA;E23-RC
2L	3470270	3470499	FBgn0051776	CG31776-RA
2L	3538790	3539210	FBgn0024244	drm-RB
2L	3559228	3559449	FBgn0004892	sob-RA
2L	3560083	3560267	FBgn0004892	sob-RA
2L	3561867	3562227	FBgn0004892	sob-RA
2L	3631710	3632802	FBgn0000721;FBgn0000721	for-RJ;for-RK
2L	3711136	3711554	FBgn0015376	cutlet-RA
2L	3712328	3712746	FBgn0051955	CG31955-RA
2L	3712907	3713638	FBgn0031566	CG2818-RA
2L	3778624	3778867	FBgn0004893	bowl-RA
2L	3867756	3867872	FBgn0031575;FBgn0031575	Cep97-RB;Cep97-RC
2L	4031814	4031975	FBgn0000547	ed-RA
2L	4037364	4037650	FBgn0000547	ed-RA
2L	4054001	4054118	FBgn0000547	ed-RA
2L	4385445	4385805	FBgn0031598	CG3338-RA
2L	4386491	4387748	FBgn0031599	Psf2-RA
2L	4390331	4390641	FBgn0027560	Tps1-RA
2L	4463847	4464622	FBgn0031610	CG15436-RA
2L	4588102	4588257	FBgn0053196	dp-RC
2L	4588376	4588888	FBgn0053196	dp-RC
2L	4808493	4808773	FBgn0031630	CG15629-RA
2L	4831086	4832442	FBgn0031633	CG2976-RA
2L	4838062	4838484	FBgn0031635	CG15626-RA
2L	4838790	4839067	FBgn0031636;FBgn0031636	CG12194-RA;CG12194-RB
2L	4887141	4887513	FBgn0031644	CG15625-RA
2L	4945746	4946144	FBgn0015000	betaggt-I-RA
2L	4978041	4978271	FBgn0031662	CG3792-RA
2L	5009688	5009846	FBgn0031668;FBgn0259719	CG31917-RA;Tfb5-RB
2L	5010541	5010657	FBgn0031668;FBgn0259719	CG31917-RA;Tfb5-RB
2L	5011051	5011295	FBgn0031670	CG3887-RA
2L	5011446	5011908	FBgn0031670	CG3887-RA
2L	5053099	5053656	FBgn0031676	CG14040-RA
2L	5054167	5054757	FBgn0031677	CG14036-RA
2L	5057180	5058363	FBgn0031678	CG31918-RA
2L	5060296	5060448	FBgn0028572;FBgn0028572;FBgn0028572	qtc-RA;qtc-RF;qtc-RE
2L	5093701	5093898	FBgn0031682	CG5828-RA
2L	5145176	5145647	FBgn0260952	Msp-300-RF
2L	5237912	5238076	FBgn0003716	tkv-RD
2L	5239439	5240565	FBgn0003716	tkv-RB
2L	5252026	5254025	FBgn0003716	tkv-RC
2L	5254528	5255511	FBgn0031693	Cyp4ac1-RA
2L	5256390	5256734	FBgn0031693	Cyp4ac1-RA
2L	5259108	5259565	FBgn0031693	Cyp4ac1-RA
2L	5271057	5271261	FBgn0003716	tkv-RA
2L	5278325	5278701	FBgn0031696	Bub1-RA
2L	5292160	5292978	FBgn0016076	vri-RC
2L	5294423	5295014	FBgn0016076	vri-RC
2L	5325813	5325966	FBgn0031698;FBgn0031698	CG14023-RA;CG14023-RB
2L	5461129	5461410	FBgn0005511	mid-RA
2L	5507064	5507385	FBgn0031707	CG14020-RA
2L	5523420	5523613	FBgn0031710	CG7371-RA
2L	5524049	5524419	FBgn0031711	CG6907-RA
2L	5527297	5527962	FBgn0051915	CG31915-RA
2L	5528194	5528587	FBgn0051915	CG31915-RA
2L	5546923	5547167	FBgn0031717	Oscillin-RA
2L	5949272	5949432	FBgn0031752	CG9044-RB
2L	6000235	6000732	FBgn0031760	Tsp26A-RB
2L	6032708	6033095	FBgn0031765;FBgn0031765	CG9109-RA;CG9109-RB
2L	6037367	6038918	FBgn0051643	CG31643-RA
2L	6068027	6068493	FBgn0031775	CG9150-RB
2L	6069779	6070520	FBgn0031777	CG9154-RA
2L	6081800	6082147	FBgn0028420	Kr-h1-RA
2L	6082895	6083125	FBgn0028420	Kr-h1-RA
2L	6323850	6324290	FBgn0021873;FBgn0021873;FBgn0021873	Gef26-RA;Gef26-RB;Gef26-RC
2L	6338369	6338715	FBgn0015623	Cpr-RA
2L	6447772	6448016	FBgn0031813	CG9527-RA
2L	6455615	6456115	FBgn0031815	CG9526-RB
2L	6467277	6467469	FBgn0031817	CG9531-RA
2L	6480999	6481113	FBgn0031820	DLP-RA
2L	6481264	6481612	FBgn0031820	DLP-RA
2L	6488094	6488599	FBgn0031821	CG9542-RA
2L	6561578	6562717	FBgn0026585	Ent2-RA
2L	6612345	6612461	FBgn0031836	CG11050-RC
2L	6648363	6648947	FBgn0031842;FBgn0031842	Tango1-RA;Tango1-RB
2L	6656732	6657591	FBgn0051636	CG31636-RA
2L	6663138	6663443	FBgn0031844	CG13771-RA
2L	6668426	6668663	FBgn0031845	CG9232-RA
2L	6676209	6677415	FBgn0031848	CG11329-RA
2L	6722605	6723207	FBgn0025777	homer-RB
2L	6787463	6787853	FBgn0015776	nrv1-RA
2L	6793758	6794126	FBgn0015777	nrv2-RD
2L	6794360	6794511	FBgn0015777;FBgn0015777	nrv2-RA;nrv2-RE
2L	6920014	6920323	FBgn0004838;FBgn0004838	Hrb27C-RA;Hrb27C-RD
2L	6956676	6958381	FBgn0031875	CG3430-RA
2L	6963520	6963674	FBgn0031878	sip2-RD
2L	7009835	7010096	FBgn0031879;FBgn0031879;FBgn0031879	SP1070-RA;SP1070-RB;SP1070-RC
2L	7027634	7028103	FBgn0031881	CG3476-RA
2L	7032421	7033008	FBgn0031883;FBgn0031883;FBgn0031883	CG11266-RG;CG11266-RD;CG11266-RA
2L	7065366	7065752	FBgn0031886	Nuf2-RA
2L	7181637	7181943	FBgn0031893;FBgn0031893	CG4495-RA;CG4495-RB
2L	7182421	7182613	FBgn0031893;FBgn0031893	CG4495-RA;CG4495-RB
2L	7320960	7321246	FBgn0004009	wg-RB
2L	7361349	7361534	FBgn0031903	Wnt10-RA
2L	7372246	7372600	FBgn0031903	Wnt10-RA
2L	7423302	7423493	FBgn0031912	CG5261-RB
2L	7424192	7425504	FBgn0031912	CG5261-RB
2L	7427188	7427309	FBgn0031912	CG5261-RB
2L	7573788	7574350	FBgn0085403	Rapgap1-RD
2L	7577146	7577266	FBgn0085403	Rapgap1-RD
2L	7809925	7810321	FBgn0031952;FBgn0031952;FBgn0031952	cdc14-RA;cdc14-RB;cdc14-RC
2L	7821261	7821493	FBgn0027515;FBgn0027515	CG7115-RA;CG7115-RB
2L	7885553	7885821	FBgn0083968	CG34132-RA
2L	8072053	8072791	FBgn0010287	Trf-RA
2L	8083731	8084163	FBgn0011219;FBgn0011219;FBgn0011219;FBgn0011219	Bsg-RD;Bsg-RC;Bsg-RB;Bsg-RA
2L	8160197	8160438	FBgn0261064	Rbsn-5-RA
2L	8162201	8162623	FBgn0031992	CG8498-RA
2L	8212611	8212773	FBgn0032000	CG8372-RA
2L	8277499	8277782	FBgn0003502;FBgn0003502	Btk29A-RC;Btk29A-RA
2L	8279125	8279607	FBgn0003502;FBgn0003502	Btk29A-RC;Btk29A-RA
2L	8300467	8300629	FBgn0003502	Btk29A-RB
2L	8302677	8302907	FBgn0261020	wol-RA
2L	8304871	8305186	FBgn0032014	CG7840-RA
2L	8310174	8311225	FBgn0032018	CG7806-RA
2L	8318485	8318725	FBgn0032019;FBgn0032019	CG7795-RC;CG7795-RD
2L	8319269	8319770	FBgn0032019;FBgn0032019	CG7795-RC;CG7795-RD
2L	8320586	8321089	FBgn0032020	CG7787-RA
2L	8364986	8366017	FBgn0260439	Pp2A-29B-RA
2L	8366219	8366380	FBgn0260439	Pp2A-29B-RB
2L	8374627	8375420	FBgn0032030	CG17293-RA
2L	8380992	8381540	FBgn0027094	Aats-ala-RA
2L	8382713	8384162	FBgn0032035	CG13393-RA
2L	8400629	8401448	FBgn0051898	CG31898-RA
2L	8401641	8402233	FBgn0001084	fy-RA
2L	8415326	8415721	FBgn0027932;FBgn0027932	Akap200-RA;Akap200-RD
2L	8462894	8463006	FBgn0026718;FBgn0026718	fu12-RA;fu12-RC
2L	8464016	8464135	FBgn0029173	fu2-RA
2L	8515609	8516190	FBgn0032052	CG13089-RA
2L	8524078	8524589	FBgn0085470;FBgn0250903	CG34441-RA;lmg-RA
2L	8535732	8536034	FBgn0028394;FBgn0028394	CG17834-RB;CG17834-RD
2L	8543925	8544048	FBgn0011259;FBgn0011259;FBgn0011259	Sema-1a-RB;Sema-1a-RC;Sema-1a-RA
2L	8691503	8691854	FBgn0004914	Hnf4-RB
2L	8718221	8718460	FBgn0004914	Hnf4-RA
2L	8898366	8899182	FBgn0085427;FBgn0085427;FBgn0085427	CG34398-RD;CG34398-RA;CG34398-RC
2L	8942946	8943218	FBgn0032076;FBgn0032077	CG9510-RC;CG9515-RA
2L	8950019	8950250	FBgn0032078	C1GalTA-RB
2L	9125819	9126273	FBgn0052982;FBgn0052982;FBgn0052982	CG32982-RA;CG32982-RD;CG32982-RE
2L	9188844	9189030	FBgn0041092	tai-RA
2L	9449131	9449484	FBgn0002973	numb-RA
2L	9451384	9451749	FBgn0002973	numb-RA
2L	9495999	9496453	FBgn0032120;FBgn0032120	CG33298-RA;CG33298-RB
2L	9521081	9521231	FBgn0032123	Oatp30B-RE
2L	9699776	9699933	FBgn0015393	hoip-RA
2L	9758127	9758530	FBgn0022720	zf30C-RA
2L	9763239	9763777	FBgn0025117	und-RA
2L	9791078	9792266	FBgn0032149	CG4036-RA
2L	9792463	9792730	FBgn0032150	CG13123-RA
2L	9890861	9891253	FBgn0032153	CG4537-RB
2L	9912936	9913052	FBgn0024285	Srp54-RA
2L	9920656	9921154	FBgn0032161	CG4594-RA
2L	9921265	9921462	FBgn0032162	CG4592-RA
2L	9926659	9926814	FBgn0259712	CG42366-RA
2L	9938459	9938941	FBgn0051713	Apf-RA
2L	10209123	10209474	FBgn0032192	CG5731-RA
2L	10220350	10221521	FBgn0024320	Npc1a-RA
2L	10232066	10232548	FBgn0032198;FBgn0032198	eEF1delta-RA;eEF1delta-RB
2L	10236482	10238456	FBgn0051720;FBgn0051720	CG31720-RC;CG31720-RD
2L	10239669	10239824	FBgn0004419	me31B-RB
2L	10246768	10246894	FBgn0024248	chico-RA
2L	10260424	10260650	FBgn0026379	Pten-RH
2L	10261049	10261515	FBgn0026379;FBgn0026379	Pten-RB;Pten-RA
2L	10264171	10264495	FBgn0032202;FBgn0032202;FBgn0032202;FBgn0032202	CG18619-RB;CG18619-RD;CG18619-RC;CG18619-RA
2L	10276951	10277520	FBgn0260749	Utx-RB
2L	10277642	10278563	FBgn0260749	Utx-RA
2L	10280035	10280899	FBgn0054043	CG34043-RB
2L	10292048	10292524	FBgn0032208	CG5604-RA
2L	10294324	10294804	FBgn0032209	Hand-RA
2L	10300199	10302073	FBgn0032211	CG13138-RB
2L	10306895	10307582	FBgn0032214	CG4968-RA
2L	10309561	10310307	FBgn0027491	Cdk5alpha-RA
2L	10314190	10315067	FBgn0032217	CG4972-RA
2L	10318114	10318710	FBgn0032218	CG5381-RA
2L	10319297	10320048	FBgn0032218	CG5381-RA
2L	10320353	10320470	FBgn0032218	CG5381-RA
2L	10322876	10323498	FBgn0032219	CG4995-RC
2L	10324636	10324754	FBgn0032219	CG4995-RC
2L	10329476	10330602	FBgn0032221;FBgn0032221	CG5375-RA;CG5375-RB
2L	10332240	10332747	FBgn0032222	CG5037-RA
2L	10332861	10333481	FBgn0032223	GATAd-RA
2L	10341425	10341543	FBgn0051715	CG31715-RA
2L	10341813	10341973	FBgn0051715	CG31715-RA
2L	10342831	10343023	FBgn0032224;FBgn0032224	Sps2-RB;Sps2-RA
2L	10353128	10353833	FBgn0085396	CG34367-RC
2L	10355569	10356248	FBgn0032228	CG5367-RA
2L	10356716	10356870	FBgn0032229	CG5045-RA
2L	10356989	10357188	FBgn0032229	CG5045-RA
2L	10363173	10363565	FBgn0003087	pim-RA
2L	10364593	10364944	FBgn0032230	CG13139-RA
2L	10376223	10376897	FBgn0032233	dpr19-RA
2L	10377897	10378807	FBgn0032234	CG5091-RA
2L	10404356	10405196	FBgn0032240;FBgn0067622	CG17768-RA;LSm-4-RB
2L	10413607	10414165	FBgn0032243;FBgn0032243;FBgn0032243	Klp31E-RA;Klp31E-RC;Klp31E-RD
2L	10419279	10420535	FBgn0032244	RfC3-RA
2L	10430641	10431079	FBgn0032248	CG5343-RA
2L	10433774	10435643	FBgn0032249	CG5337-RA
2L	10436268	10437042	FBgn0032250	CG5198-RA
2L	10437813	10437965	FBgn0027052	CHIP-RA
2L	10476183	10476379	FBgn0032256	RluA-2-RA
2L	10613190	10614155	FBgn0032271	CG7329-RA
2L	10615353	10615478	FBgn0032271	CG7329-RA
2L	10736140	10737277	FBgn0032294	CG6737-RA
2L	10967573	10967772	FBgn0053129	CG33129-RB
2L	10985221	10985421	FBgn0004872	piwi-RA
2L	11010101	11010563	FBgn0032329	Art8-RA
2L	11059322	11060568	FBgn0032330	Samuel-RA
2L	11181555	11182033	FBgn0032354	CG4788-RA
2L	11182795	11183169	FBgn0032354	CG4788-RA
2L	11210910	11211229	FBgn0259750;FBgn0259750;FBgn0259750	ab-RB;ab-RA;ab-RD
2L	11269015	11269572	FBgn0040233;FBgn0052831	cana-RA;CG33695-RA
2L	11270117	11270772	FBgn0040233;FBgn0052831	cana-RA;CG33695-RA
2L	11305952	11306113	FBgn0032359	Osi21-RA
2L	11312827	11312938	FBgn0032359	Osi21-RA
2L	11407421	11407626	FBgn0004579	salm-RA
2L	11447363	11447777	FBgn0004579	salm-RA
2L	11806149	11808058	FBgn0020309;FBgn0020309;FBgn0020309	crol-RB;crol-RC;crol-RA
2L	11813211	11813877	FBgn0032378	CG14939-RA
2L	11966867	11967147	FBgn0032387	CG16965-RA
2L	11968370	11969187	FBgn0032387	CG16965-RA
2L	11970994	11971179	FBgn0032387	CG16965-RA
2L	11989072	11990164	FBgn0032390	dgt2-RA
2L	11993458	11993728	FBgn0051866	Ada1-2-RA
2L	11997369	11997639	FBgn0051865	Ada1-1-RA
2L	12003753	12004177	FBgn0032394	CG6746-RA
2L	12004644	12005072	FBgn0014019	Rh5-RA
2L	12005218	12005382	FBgn0014019	Rh5-RA
2L	12005865	12006306	FBgn0014019	Rh5-RA
2L	12010731	12011371	FBgn0014019	Rh5-RA
2L	12011642	12012535	FBgn0014019	Rh5-RA
2L	12027461	12027857	FBgn0010497	l(2)01810-RA
2L	12039704	12040325	FBgn0032398	CG6766-RA
2L	12041888	12043151	FBgn0032399	CG6785-RA
2L	12046199	12046356	FBgn0032400	CG6770-RA
2L	12096664	12097736	FBgn0028707	Mt2-RA
2L	12101808	12102617	FBgn0029137	Patsas-RA
2L	12103250	12103962	FBgn0027081	Aats-thr-RB
2L	12434603	12434799	FBgn0040286	SC35-RA
2L	12460466	12460639	FBgn0259176	bun-RC
2L	12461099	12461544	FBgn0259176	bun-RC
2L	12483595	12484344	FBgn0259176	bun-RB
2L	12514053	12514283	FBgn0259176	bun-RE
2L	12545923	12546282	FBgn0259176;FBgn0259176	bun-RG;bun-RF
2L	12578473	12578595	FBgn0085424	nub-RB
2L	12586883	12587301	FBgn0085424	nub-RB
2L	12618139	12618581	FBgn0085424	nub-RD
2L	12635143	12635621	FBgn0085424	nub-RD
2L	12694159	12694885	FBgn0032446	CG5780-RB
2L	12696023	12696257	FBgn0032447	PICK1-RB
2L	12696798	12697702	FBgn0032448	CG5781-RA
2L	12697895	12698252	FBgn0032448	CG5781-RA
2L	12700138	12700409	FBgn0032449	CG17036-RA
2L	12708033	12708385	FBgn0032453	CG6180-RA
2L	13001366	13002247	FBgn0032465	CG12404-RA
2L	13003501	13004907	FBgn0020368	Vha68-1-RA
2L	13086672	13087267	FBgn0032470	CG5142-RC
2L	13176352	13177151	FBgn0032475;FBgn0032475;FBgn0032475	Sfmbt-RA;Sfmbt-RB;Sfmbt-RC
2L	13203788	13203986	FBgn0032482;FBgn0032482;FBgn0032482	Pect-RB;Pect-RC;Pect-RD
2L	13221674	13222384	FBgn0032488	CG16812-RA
2L	13296063	13296850	FBgn0051729	CG31729-RA
2L	13367016	13367253	FBgn0051852	Tap42-RA
2L	13368565	13368842	FBgn0051855;FBgn0051855	CG31855-RA;CG31855-RB
2L	13374224	13374498	FBgn0032513	CG6565-RA
2L	13387803	13388115	FBgn0032517	CG7099-RA
2L	13444815	13445252	FBgn0032524	CG9267-RA
2L	13550322	13550606	FBgn0259984;FBgn0259984	kuz-RC;kuz-RF
2L	13665668	13666023	FBgn0028527;FBgn0028527	CG18507-RA;CG18507-RB
2L	13771214	13771554	FBgn0028541	TM9SF4-RA
2L	13780556	13780792	FBgn0024846	p38b-RA
2L	13790913	13791298	FBgn0028931;FBgn0028931	CG16863-RB;CG16863-RA
2L	13791458	13792124	FBgn0028931;FBgn0028931	CG16863-RB;CG16863-RA
2L	13810305	13810957	FBgn0028658	adat-RA
2L	13829277	13829673	FBgn0001961	Sop2-RA
2L	13837041	13837158	FBgn0028509	cenG1A-RB
2L	14382338	14382465	FBgn0020258	ppk-RA
2L	14422028	14422760	FBgn0028871	Cpr35B-RA
2L	14425321	14425569	FBgn0028871	Cpr35B-RA
2L	14460472	14461178	FBgn0028844	CG15283-RB
2L	14490103	14491278	FBgn0005771	noc-RA
2L	14499126	14499594	FBgn0005771	noc-RA
2L	14499748	14499986	FBgn0005771	noc-RA
2L	14513456	14514089	FBgn0053648	CG33648-RA
2L	14531244	14531552	FBgn0053648	CG33648-RA
2L	14531672	14532042	FBgn0053648	CG33648-RA
2L	14552660	14552944	FBgn0250844	CG4218-RA
2L	14558166	14558404	FBgn0028913	CG3473-RA
2L	14664286	14664400	FBgn0003016;FBgn0003016;FBgn0003016;FBgn0003016	osp-RC;osp-RD;osp-RE;osp-RF
2L	14999728	14999938	FBgn0086711;FBgn0086711	mol-RA;mol-RB
2L	15039252	15039898	FBgn0004837	Su(H)-RA
2L	15058339	15058566	FBgn0053679	CG33679-RA
2L	15061150	15061378	FBgn0003970	vas-RA
2L	15256647	15257271	FBgn0259982	l(2)35Cc-RA
2L	15313964	15314126	FBgn0041103	nht-RB
2L	15333678	15334107	FBgn0001981	esg-RA
2L	15363465	15363923	FBgn0032563	CG15258-RA
2L	15387285	15387439	FBgn0051828	CG31828-RA
2L	15406156	15406273	FBgn0028891	CG18482-RA
2L	15406987	15407381	FBgn0028891	CG18482-RA
2L	15413370	15414217	FBgn0028891	CG18482-RA
2L	15747224	15747545	FBgn0010382	CycE-RA
2L	16257284	16257931	FBgn0028515	EndoGI-RA
2L	16260520	16261806	FBgn0002673	twe-RA
2L	16284472	16284908	FBgn0001994	crp-RA
2L	16286900	16287127	FBgn0001994	crp-RA
2L	16288218	16288579	FBgn0040079	pkaap-RA
2L	16303365	16304838	FBgn0028525	c(2)M-RA
2L	16306636	16307951	FBgn0011708	Syx5-RB
2L	16310217	16310788	FBgn0000339	cni-RB
2L	16325640	16325799	FBgn0000250;FBgn0000250	cact-RB;cact-RC
2L	16326846	16327844	FBgn0014092	CG4278-RA
2L	16328129	16328722	FBgn0001995	mRpL4-RA
2L	16350187	16350422	FBgn0000307;FBgn0000307;FBgn0087041	chif-RA;chif-RB;CG42231-RA
2L	16350790	16350985	FBgn0000307;FBgn0000307;FBgn0087041	chif-RA;chif-RB;CG42231-RA
2L	16491755	16491871	FBgn0032586	Tpr2-RA
2L	16526055	16526200	FBgn0032587	CG5953-RC
2L	16545154	16545349	FBgn0259735;FBgn0259735	CG42389-RD;CG42389-RE
2L	16677320	16677876	FBgn0001185	her-RA
2L	16683937	16684470	FBgn0261278	grp-RA
2L	16689990	16690143	FBgn0261278	grp-RA
2L	16719284	16719938	FBgn0000409	Cyt-c-p-RA
2L	16729936	16730509	FBgn0051812	CG31812-RB
2L	16826398	16826598	FBgn0051739	CG31739-RA
2L	17384208	17384953	FBgn0020503	CLIP-190-RB
2L	17449895	17450053	FBgn0260632;FBgn0260632	dl-RB;dl-RC
2L	17473194	17473511	FBgn0032640	Sgt-RA
2L	17743232	17743784	FBgn0015609;FBgn0015609;FBgn0015609;FBgn0015609;FBgn0015609;FBgn0015609;FBgn0015609;FBgn0015609;FBgn0015609;FBgn0015609;FBgn0015609;FBgn0015609	CadN-RE;CadN-RH;CadN-RA;CadN-RF;CadN-RC;CadN-RB;CadN-RD;CadN-RG;CadN-RI;CadN-RJ;CadN-RK;CadN-RL
2L	17749063	17749296	FBgn0015609;FBgn0015609;FBgn0015609;FBgn0015609;FBgn0015609;FBgn0015609;FBgn0015609;FBgn0015609;FBgn0015609;FBgn0015609;FBgn0015609;FBgn0015609	CadN-RE;CadN-RH;CadN-RA;CadN-RF;CadN-RC;CadN-RB;CadN-RD;CadN-RG;CadN-RI;CadN-RJ;CadN-RK;CadN-RL
2L	17749674	17750025	FBgn0015609;FBgn0015609;FBgn0015609;FBgn0015609;FBgn0015609;FBgn0015609;FBgn0015609;FBgn0015609;FBgn0015609;FBgn0015609;FBgn0015609;FBgn0015609	CadN-RE;CadN-RH;CadN-RA;CadN-RF;CadN-RC;CadN-RB;CadN-RD;CadN-RG;CadN-RI;CadN-RJ;CadN-RK;CadN-RL
2L	18150171	18150371	FBgn0041184;FBgn0041184	Socs36E-RA;Socs36E-RB
2L	18312472	18312735	FBgn0000636;FBgn0000636;FBgn0000636;FBgn0000636	Fas3-RA;Fas3-RB;Fas3-RC;Fas3-RD
2L	18313886	18314078	FBgn0000636;FBgn0000636;FBgn0000636;FBgn0000636	Fas3-RA;Fas3-RB;Fas3-RC;Fas3-RD
2L	18320316	18320471	FBgn0000636	Fas3-RE
2L	18485574	18485859	FBgn0032682	CG10176-RB
2L	18563761	18564111	FBgn0085370	Pde11-RB
2L	18676400	18676789	FBgn0086681	Mst36Fa-RB
2L	18690018	18690439	FBgn0032698	CG10336-RA
2L	18694588	18695452	FBgn0032699	CG10383-RA
2L	18695845	18696195	FBgn0032700	CG10338-RA
2L	18696393	18697117	FBgn0032700	CG10338-RA
2L	18703604	18703762	FBgn0032703	CG10343-RA
2L	18708465	18708659	FBgn0032705	Grip71-RA
2L	18830455	18830850	FBgn0032715	CG17597-RA
2L	18831321	18831554	FBgn0015808	ScpX-RA
2L	18857246	18857644	FBgn0032721	CG10602-RB
2L	18858654	18859372	FBgn0032720;FBgn0032721	mRpL13-RA;CG10602-RA
2L	18874055	18874212	FBgn0003896;FBgn0003896	tup-RA;tup-RB
2L	18943790	18944645	FBgn0032723	ssp3-RA
2L	18947520	18947911	FBgn0032724	CG10428-RA
2L	18948140	18948336	FBgn0032724	CG10428-RA
2L	18948448	18949464	FBgn0032724	CG10428-RA
2L	18968994	18969652	FBgn0032728	Tango6-RA
2L	19033833	19034827	FBgn0051800	CG31800-RA
2L	19043921	19044823	FBgn0032744	CG15173-RA
2L	19048328	19048482	FBgn0032746	CG10470-RA
2L	19049225	19049577	FBgn0032746	CG10470-RA
2L	19062202	19062830	FBgn0032750	CG10495-RA
2L	19132106	19133076	FBgn0086446	l(2)37Ce-RA
2L	19133557	19133681	FBgn0010300	brat-RA
2L	19135113	19135511	FBgn0010300	brat-RA
2L	19136390	19136980	FBgn0010300	brat-RA
2L	19141567	19141972	FBgn0010300	brat-RA
2L	19161485	19161941	FBgn0010300	brat-RB
2L	19182429	19182975	FBgn0040994;FBgn0040994;FBgn0040994;FBgn0040994	CG17567-RA;CG17567-RB;CG17567-RC;CG17567-RD
2L	19184788	19185064	FBgn0010097	gammaTub37C-RA
2L	19321513	19322325	FBgn0032769	CG10750-RA
2L	19323063	19324175	FBgn0032769	CG10750-RA
2L	19426197	19426616	FBgn0032780	CG13085-RA
2L	19429633	19429948	FBgn0032781	CG9987-RA
2L	19453364	19453870	FBgn0003732	Top2-RA
2L	19485259	19486131	FBgn0032788	CG13084-RA
2L	19487551	19488026	FBgn0032789;FBgn0032789	CG13083-RA;CG13083-RB
2L	19532242	19533102	FBgn0053116	CG33116-RA
2L	19540538	19541100	FBgn0032804	CG13081-RA
2L	19541869	19542350	FBgn0003231	ref(2)P-RA
2L	19542549	19542942	FBgn0003231	ref(2)P-RB
2L	19571326	19571451	FBgn0005672	spi-RD
2L	19571568	19571763	FBgn0005672	spi-RD
2L	19572050	19572949	FBgn0005672;FBgn0005672	spi-RE;spi-RB
2L	19574514	19575892	FBgn0005672	spi-RG
2L	19576528	19576878	FBgn0005672;FBgn0005672	spi-RA;spi-RF
2L	19577412	19577527	FBgn0027949	msb1l-RA
2L	19741364	19742495	FBgn0032816	Nf-YB-RA
2L	19757582	19759674	FBgn0032818	CG10628-RA
2L	19792128	19792474	FBgn0032822	CG10466-RA
2L	19869476	19869666	FBgn0260966	sick-RC
2L	19949820	19950016	FBgn0032833	CG10664-RB
2L	19950794	19951221	FBgn0032833	CG10664-RB
2L	19958726	19959272	FBgn0032833	CG10664-RA
2L	20061073	20061592	FBgn0019686;FBgn0019686;FBgn0019686	lok-RA;lok-RB;lok-RC
2L	20065897	20066438	FBgn0045064	bwa-RA
2L	20090569	20092909	FBgn0032846	CG10721-RA
2L	20093131	20094142	FBgn0032847	Taf13-RA
2L	20350091	20350249	FBgn0011638	La-RB
2L	20427974	20428481	FBgn0051688;FBgn0051688	CG31688-RB;CG31688-RC
2L	20644572	20645270	FBgn0016054;FBgn0016054	phr6-4-RA;phr6-4-RB
2L	20645976	20646214	FBgn0032870	CG2608-RA
2L	20646405	20646760	FBgn0032870	CG2608-RA
2L	20647067	20647341	FBgn0032870	CG2608-RA
2L	20681306	20681616	FBgn0032876	CG1962-RA
2L	20798050	20798163	FBgn0032886	CG9328-RB
2L	20800356	20801043	FBgn0032886	CG9328-RB
2L	21009271	21009847	FBgn0250867	CG42238-RB
2L	21017571	21018396	FBgn0250867	CG42238-RA
2L	21018927	21019131	FBgn0250867	CG42238-RA
2L	21019561	21019872	FBgn0250867	CG42238-RA
2L	21030427	21031006	FBgn0250867	CG42238-RA
2L	21051823	21052661	FBgn0250867	CG42238-RA
2L	21052782	21052903	FBgn0010395	betaInt-nu-RA
2L	21089582	21090128	FBgn0032913	CG9259-RA
2L	21102801	21102951	FBgn0032916	CG9257-RA
2L	21103071	21103664	FBgn0032916	CG9257-RA
2L	21147756	21149209	FBgn0086251	del-RA
2L	21153351	21153807	FBgn0024371	E2f2-RA
2L	21156539	21158516	FBgn0032921	Mpp6-RA
2L	21166835	21167277	FBgn0032926;FBgn0032926	CG9243-RB;CG9243-RA
2L	21167392	21168175	FBgn0010100	Acon-RB
2L	21219476	21220524	FBgn0032935	CG8678-RA
2L	21236544	21237236	FBgn0051626	CG31626-RA
2L	21310661	21310816	FBgn0000370;FBgn0000370	crc-RA;crc-RD
2L	21630045	21630322	FBgn0022893	Df31-RB
2L	21657731	21658803	FBgn0032956;FBgn0032956	cul-2-RA;cul-2-RB
2L	21677314	21677918	FBgn0032957	CG2225-RE
2L	21757587	21758058	FBgn0032961;FBgn0032961;FBgn0032961	CG1416-RA;CG1416-RB;CG1416-RC
2L	21829064	21829337	FBgn0003866	tsh-RA
2L	21880922	21881230	FBgn0032965	CG11629-RA
2L	22018439	22019517	FBgn0028979	tio-RA
2L	22121166	22121449	FBgn0032974	CG3651-RA
2L	22121802	22122072	FBgn0032974	CG3651-RA
2L	22131184	22131328	FBgn0025674	CycK-RB
2L	22247984	22249144	FBgn0032987	RpL21-RA
2L	22429753	22429866	FBgn0064225;FBgn0064225	RpL5-RB;RpL5-RF
2L	22430021	22430899	FBgn0040009	CG17490-RD
2L	22431333	22432204	FBgn0040009	CG17490-RA
2L	22438505	22438736	FBgn0040010	CG17493-RA
2L	22440233	22440776	FBgn0040010	CG17493-RA
2L	22443032	22443816	FBgn0040010	CG17493-RA
2L	22471171	22471402	FBgn0040011;FBgn0040011	CG17494-RA;CG17494-RC
2L	22471717	22471946	FBgn0040011;FBgn0040011	CG17494-RA;CG17494-RC
2L	22736264	22737329	FBgn0041004;FBgn0041004	CG17715-RA;CG17715-RB
2L	22960663	22961772	FBgn0086683;FBgn0086683	Spf45-RA;Spf45-RB
2L	22961926	22962125	FBgn0086683;FBgn0086683	Spf45-RA;Spf45-RB
2R	18355	18707	FBgn0040002	CG17683-RE
2R	358498	358860	FBgn0260798	Gprk1-RB
2R	404182	404350	FBgn0040007	RpL38-RA
2R	404504	405203	FBgn0040007	RpL38-RA
2R	432463	433886	FBgn0046692	Stlk-RB
2R	434041	434510	FBgn0046692	Stlk-RA
2R	482274	482758	FBgn0260799;FBgn0260799	p120ctn-RA;p120ctn-RB
2R	500468	500931	FBgn0032997	CG17486-RB
2R	506597	507236	FBgn0032997	CG17486-RB
2R	546343	546578	FBgn0040005;FBgn0040005	CG17883-RA;CG17883-RB
2R	558648	559008	FBgn0040005;FBgn0040005	CG17883-RA;CG17883-RB
2R	670711	670938	FBgn0250830	CG12547-RA
2R	716285	717093	FBgn0033000	CG14464-RC
2R	976544	977340	FBgn0033005	CG3107-RA
2R	1016584	1016939	FBgn0026238	gus-RB
2R	1032093	1032597	FBgn0033010;FBgn0033010	Atf6-RC;Atf6-RA
2R	1139138	1139378	FBgn0053554;FBgn0053554	Nipped-A-RA;Nipped-A-RD
2R	1139889	1140751	FBgn0053554;FBgn0053554	Nipped-A-RA;Nipped-A-RD
2R	1147140	1147303	FBgn0033015	d4-RB
2R	1191504	1191937	FBgn0261403	sxc-RB
2R	1193008	1193702	FBgn0261403	sxc-RB
2R	1228229	1228830	FBgn0033017	CG10465-RA
2R	1238326	1238441	FBgn0033019	CG10395-RA
2R	1241694	1242276	FBgn0033020	CG10396-RA
2R	1303514	1304234	FBgn0259247	CG42345-RF
2R	1492186	1492682	FBgn0039969;FBgn0039969;FBgn0039969;FBgn0039969	CG17510-RA;CG17510-RC;CG17510-RD;CG17510-RE
2R	1492840	1496356	FBgn0039970	CG17508-RA
2R	1540905	1541481	FBgn0027507	CG1344-RA
2R	1550361	1550598	FBgn0033029	l(2)NC136-RA
2R	1550982	1551372	FBgn0033029	l(2)NC136-RA
2R	1555337	1557397	FBgn0033031	CG8245-RA
2R	1558136	1559504	FBgn0033032	CG1298-RA
2R	1589098	1589573	FBgn0259978;FBgn0259978;FBgn0259978;FBgn0259978;FBgn0259978	vlc-RA;vlc-RB;vlc-RC;vlc-RD;vlc-RE
2R	1622842	1623434	FBgn0000099;FBgn0000099	ap-RA;ap-RC
2R	1638991	1639428	FBgn0022288	l(2)09851-RA
2R	1644891	1645052	FBgn0085229	CG34200-RA
2R	1855915	1856342	FBgn0033048	CG7881-RA
2R	1861497	1861861	FBgn0025458	BubR1-RA
2R	1868777	1869282	FBgn0004603	Src42A-RB
2R	1869515	1869831	FBgn0004603	Src42A-RA
2R	1880847	1881551	FBgn0033049	CG14471-RB
2R	1924991	1925435	FBgn0033054;FBgn0033054	CG14591-RA;CG14591-RB
2R	2034794	2034970	FBgn0000546	EcR-RF
2R	2388249	2389346	FBgn0086655;FBgn0086655	jing-RB;jing-RI
2R	2417225	2417504	FBgn0086655;FBgn0086655	jing-RB;jing-RI
2R	2518342	2518892	FBgn0004145	Vha16-RC
2R	2544177	2544451	FBgn0013732	sced-RA
2R	2550803	2551113	FBgn0000054;FBgn0000054;FBgn0000054	Adf1-RA;Adf1-RB;Adf1-RC
2R	2556423	2557426	FBgn0033086	CG9410-RB
2R	2629137	2629835	FBgn0028579	phtf-RA
2R	2635752	2636102	FBgn0027066;FBgn0027066;FBgn0027066	Eb1-RB;Eb1-RE;Eb1-RF
2R	2644712	2644949	FBgn0033101	CG9436-RA
2R	2697086	2697204	FBgn0033104	CG15237-RA
2R	2697434	2698067	FBgn0022224	ubl-RA
2R	2761039	2761555	FBgn0033109	coro-RC
2R	2873321	2873818	FBgn0033122	CG17002-RB
2R	2897679	2899286	FBgn0029507	Tsp42Ed-RA
2R	2912644	2913028	FBgn0033127	Tsp42Ef-RA
2R	2976085	2977562	FBgn0028642	esn-RB
2R	3032615	3032930	FBgn0024294	Spn43Aa-RA
2R	3033424	3034328	FBgn0024294	Spn43Aa-RA
2R	3165686	3165901	FBgn0260991	Incenp-RA
2R	3204580	3205520	FBgn0033158	CG12164-RA
2R	3239941	3240296	FBgn0033159;FBgn0033159;FBgn0033159;FBgn0033159;FBgn0033159;FBgn0033159;FBgn0033159;FBgn0033159;FBgn0033159;FBgn0033159;FBgn0033159;FBgn0033159;FBgn0033159;FBgn0033159;FBgn0033159;FBgn0033159;FBgn0033159;FBgn0033159;FBgn0033159;FBgn0033159;FBgn0033159;FBgn0033159;FBgn0033159;FBgn0033159;FBgn0033159;FBgn0033159;FBgn0033159;FBgn0033159;FBgn0033159;FBgn0033159;FBgn0033159;FBgn0033159;FBgn0033159;FBg…	Dscam-RBG;Dscam-RBH;Dscam-RBB;Dscam-RBC;Dscam-RBD;Dscam-RBE;Dscam-RBF;Dscam-RAW;Dscam-RAX;Dscam-RAY;Dscam-RAZ;Dscam-RBA;Dscam-RAQ;Dscam-RAR;Dscam-RAS;Dscam-RAT;Dscam-RAU;Dscam-RAV;Dscam-RAL;Dscam-RA;Dscam-RC;Dscam-RD;Dscam-RE;Dscam-RAM;Dscam-RAN;Dscam-RAO;Dscam-RF;Dscam-RG;Dscam-RH;Dscam-RI;Dscam-RJ;Dscam-RK;Dscam-RL;Dscam-RM;Dscam-RN;Dscam-RO;Dscam-RP;Dscam-RQ;Dscam-RR;Dscam-RS;Dscam-RT;Dscam-RU…
2R	3333472	3334404	FBgn0040513;FBgn0040513;FBgn0050503	kappaB-Ras-RA;kappaB-Ras-RB;CG30503-RB
2R	3337050	3337211	FBgn0050502	CG30502-RB
2R	3344732	3344850	FBgn0025885	Inos-RA
2R	3360557	3360674	FBgn0010548	Aldh-III-RI
2R	3361769	3362471	FBgn0010548	Aldh-III-RM
2R	3376706	3377170	FBgn0259745	wech-RB
2R	3387201	3387605	FBgn0015929	dpa-RA
2R	3388315	3388701	FBgn0261397;FBgn0261397;FBgn0261397	didum-RC;didum-RB;didum-RA
2R	3404666	3405563	FBgn0033186	CG1602-RA
2R	3405950	3406254	FBgn0033186	CG1602-RA
2R	3471813	3472163	FBgn0004133	blow-RB
2R	3547602	3548080	FBgn0033202	Gr43b-RA
2R	3549707	3550297	FBgn0033203	CG2070-RA
2R	3558119	3558518	FBgn0033207	CG12826-RA
2R	3558822	3559128	FBgn0033207	CG12826-RA
2R	3560587	3561020	FBgn0033208	mRpL52-RA
2R	3561881	3562459	FBgn0033209	CG12107-RA
2R	3679533	3679763	FBgn0001091;FBgn0001091	Gapdh1-RA;Gapdh1-RB
2R	3804210	3804710	FBgn0015509	lin19-RB
2R	3814118	3814345	FBgn0033234	CG8791-RA
2R	3817872	3818302	FBgn0050381	CG30381-RB
2R	3826958	3827335	FBgn0050379	CG30379-RA
2R	3846796	3847270	FBgn0033241	CG2915-RB
2R	3955444	3956577	FBgn0020279	lig-RF
2R	3967190	3967932	FBgn0021814	Vps28-RA
2R	3969707	3969987	FBgn0025469	slv-RA
2R	3970559	3971074	FBgn0028563	sut1-RA
2R	3981741	3982021	FBgn0033258	CG8712-RB
2R	3986590	3986711	FBgn0033259	CG11210-RA
2R	4013516	4014438	FBgn0033265;FBgn0033265	coilin-RC;coilin-RD
2R	4014896	4015046	FBgn0033266	Socs44A-RA
2R	4015165	4015515	FBgn0033266	Socs44A-RA
2R	4018386	4018742	FBgn0260390;FBgn0260398	CG42516-RB;Pbp49-RB
2R	4044187	4044385	FBgn0010504	kermit-RB
2R	4045080	4045511	FBgn0050374	CG30374-RA
2R	4057905	4058968	FBgn0011659	Mlh1-RA
2R	4512968	4513376	FBgn0022027	Vps25-RA
2R	4535066	4535382	FBgn0003892	ptc-RA
2R	4537321	4537561	FBgn0003892	ptc-RA
2R	4543058	4543251	FBgn0003892	ptc-RA
2R	4543382	4543664	FBgn0003892	ptc-RA
2R	4611677	4612143	FBgn0005695	gcl-RA
2R	4624928	4625356	FBgn0261267	CG42615-RB
2R	4778541	4778852	FBgn0033337	CG8272-RA
2R	4786856	4788174	FBgn0033340	CG13751-RA
2R	4789316	4789429	FBgn0004921;FBgn0004921;FBgn0004921;FBgn0004921;FBgn0004921	Ggamma1-RA;Ggamma1-RB;Ggamma1-RC;Ggamma1-RD;Ggamma1-RE
2R	4795154	4795323	FBgn0050349	CG30349-RA
2R	4800798	4801189	FBgn0003074	Pgi-RA
2R	4801305	4801617	FBgn0003074;FBgn0003074	Pgi-RB;Pgi-RC
2R	4809709	4809991	FBgn0033348	CG8247-RB
2R	4827029	4827182	FBgn0033354	CG13745-RA
2R	4827893	4828338	FBgn0033355	CG13748-RA
2R	4829240	4829393	FBgn0033355	CG13748-RA
2R	4839315	4839783	FBgn0011300;FBgn0011300;FBgn0011300	babo-RB;babo-RA;babo-RC
2R	4893700	4893815	FBgn0085379	CG34350-RA
2R	4915772	4917280	FBgn0033365;FBgn0033365	CG8170-RA;CG8170-RB
2R	4979751	4980599	FBgn0033373	CG8080-RA
2R	4981035	4982201	FBgn0033374	CG13741-RA
2R	4985604	4986335	FBgn0033375	CG8078-RA
2R	4997340	4998179	FBgn0033378	tsu-RA
2R	5001833	5001993	FBgn0033380	Phax-RB
2R	5064292	5064441	FBgn0015477	Rme-8-RA
2R	5064599	5065288	FBgn0015477	Rme-8-RA
2R	5065448	5066610	FBgn0002567	ltd-RB
2R	5079332	5079495	FBgn0033391;FBgn0033391	CG8026-RA;CG8026-RB
2R	5196399	5196523	FBgn0033402	Myd88-RA
2R	5287379	5287695	FBgn0053774	CG33774-RA
2R	5297189	5297388	FBgn0016078	wun-RA
2R	5328790	5329146	FBgn0029092	ced-6-RC
2R	5440291	5440821	FBgn0033421	CG1888-RA
2R	5466173	5466508	FBgn0033426	CG1814-RA
2R	5473704	5474133	FBgn0033429;FBgn0033429	CG12929-RA;CG12929-RB
2R	5493951	5494269	FBgn0050000	CG30000-RA
2R	5599486	5600073	FBgn0010316	dap-RA
2R	5724749	5725570	FBgn0033449	CG1663-RA
2R	5726381	5726855	FBgn0033451	CG1665-RA
2R	5727673	5728549	FBgn0033451	CG1665-RA
2R	5729925	5730448	FBgn0033453	CG1667-RA
2R	5731529	5732348	FBgn0033453	CG1667-RA
2R	5751937	5753182	FBgn0011241	cbx-RB
2R	5846882	5847044	FBgn0033466;FBgn0033466	CG12130-RA;CG12130-RB
2R	5847199	5847623	FBgn0033466;FBgn0033466	CG12130-RA;CG12130-RB
2R	5854251	5856199	FBgn0033469	CG12133-RA
2R	5912977	5913684	FBgn0022382	Pka-R2-RB
2R	5913913	5914510	FBgn0033473;FBgn0033473	CG12128-RA;CG12128-RB
2R	5919723	5919842	FBgn0033474;FBgn0033474;FBgn0033474	CG1407-RB;CG1407-RA;CG1407-RC
2R	5943976	5944290	FBgn0033478	CG2264-RB
2R	5953676	5954148	FBgn0033480	mRpL42-RA
2R	5956435	5956707	FBgn0033481	CG12920-RA
2R	5963742	5963895	FBgn0033482	CG1371-RA
2R	5997977	5998373	FBgn0003071;FBgn0003071	Pfk-RC;Pfk-RB
2R	6010667	6011098	FBgn0010531;FBgn0010531	CCS-RA;CCS-RB
2R	6011487	6012243	FBgn0050011;FBgn0050011;FBgn0050011	gem-RA;gem-RC;gem-RD
2R	6046754	6046990	FBgn0033495;FBgn0033495	CG12214-RB;CG12214-RA
2R	6308986	6310249	FBgn0053474	CG33474-RA
2R	6310525	6310832	FBgn0053474	CG33474-RA
2R	6316026	6316656	FBgn0250861;FBgn0250861;FBgn0250861	RanBPM-RC;RanBPM-RA;RanBPM-RD
2R	6430077	6430237	FBgn0005630	lola-RR
2R	6456520	6456677	FBgn0004399;FBgn0004399;FBgn0004399;FBgn0004399	psq-RK;psq-RG;psq-RF;psq-RE
2R	6468093	6468333	FBgn0004399;FBgn0004399;FBgn0004399	psq-RJ;psq-RH;psq-RD
2R	6469019	6469443	FBgn0004399;FBgn0004399;FBgn0004399	psq-RJ;psq-RH;psq-RD
2R	6469602	6469714	FBgn0004399;FBgn0004399;FBgn0004399	psq-RJ;psq-RH;psq-RD
2R	6562240	6562565	FBgn0033541	CG12934-RA
2R	6669484	6670128	FBgn0053144	CG33144-RA
2R	6696835	6696989	FBgn0033547	CG12935-RA
2R	6697111	6697657	FBgn0033547	CG12935-RA
2R	6699934	6701271	FBgn0033550	CG12341-RA
2R	6767756	6768771	FBgn0033564;FBgn0033564;FBgn0061356;FBgn0061356	CG11919-RA;CG11919-RB;CG18003-RA;CG18003-RC
2R	6771014	6772268	FBgn0061356	CG18003-RB
2R	6772865	6773215	FBgn0033566	CG18004-RC
2R	6773870	6774313	FBgn0050020	CG30020-RA
2R	6781965	6782714	FBgn0033569	CG12942-RA
2R	7037632	7038107	FBgn0033581	CG12391-RA
2R	7068798	7069269	FBgn0003396	shn-RA
2R	7069497	7070508	FBgn0003396	shn-RA
2R	7071354	7071831	FBgn0003396	shn-RA
2R	7072158	7072400	FBgn0003396	shn-RA
2R	7072517	7072689	FBgn0003396	shn-RA
2R	7072867	7072990	FBgn0003396	shn-RA
2R	7084923	7085698	FBgn0003396	shn-RB
2R	7086048	7086286	FBgn0003396	shn-RB
2R	7176911	7177066	FBgn0033609	fbl6-RB
2R	7184536	7185151	FBgn0259238	CG42336-RB
2R	7190375	7190683	FBgn0033614	Obp47b-RA
2R	7191180	7191370	FBgn0033614	Obp47b-RA
2R	7248116	7248236	FBgn0024188	san-RA
2R	7338767	7339035	FBgn0000581	E(Pc)-RA
2R	7362737	7363357	FBgn0001269;FBgn0001269	inv-RC;inv-RB
2R	7415591	7416302	FBgn0000577;FBgn0000577	en-RB;en-RA
2R	7488740	7489690	FBgn0033636;FBgn0033636	tou-RA;tou-RE
2R	7491222	7492095	FBgn0033636;FBgn0033636	tou-RA;tou-RE
2R	7494768	7495613	FBgn0033636;FBgn0033636	tou-RA;tou-RE
2R	7567191	7567419	FBgn0040491	Buffy-RA
2R	7773571	7774271	FBgn0260932	cuff-RA
2R	7872172	7873330	FBgn0011704	RnrS-RA
2R	7876253	7876761	FBgn0033673	CG8298-RA
2R	7912516	7912864	FBgn0033674	CG8964-RA
2R	7915029	7915658	FBgn0260012	pds5-RA
2R	8039337	8039720	FBgn0033687	CG8407-RB
2R	8051025	8051821	FBgn0040759	CG13177-RA
2R	8066793	8067064	FBgn0033691	CG8860-RA
2R	8067541	8068520	FBgn0033692	wash-RA
2R	8070696	8071713	FBgn0000426	DebB-RA
2R	8074722	8074869	FBgn0025454	Cyp6g1-RA
2R	8223015	8223525	FBgn0033715	CG8490-RB
2R	8224432	8224901	FBgn0054021	CG34021-RA
2R	8231669	8231990	FBgn0033717	CG8839-RC
2R	8311572	8313411	FBgn0033735	CG8525-RA
2R	8323179	8324220	FBgn0050051	CG30051-RC
2R	8355257	8355648	FBgn0033741	CG8545-RA
2R	8394873	8395098	FBgn0045063	fdl-RC
2R	8396950	8398121	FBgn0033748;FBgn0033748	vis-RA;vis-RB
2R	8399752	8400339	FBgn0033748;FBgn0033748	vis-RA;vis-RB
2R	8400494	8401567	FBgn0033749;FBgn0033749	achi-RC;achi-RA
2R	8401805	8401918	FBgn0033749;FBgn0033749	achi-RC;achi-RA
2R	8402405	8402560	FBgn0033749;FBgn0033749	achi-RC;achi-RA
2R	8416456	8417009	FBgn0011592;FBgn0011592	fra-RB;fra-RA
2R	8457930	8459329	FBgn0003527	stil-RA
2R	8474330	8475024	FBgn0050055	CG30055-RA
2R	8475376	8475658	FBgn0050055	CG30055-RA
2R	8475859	8475975	FBgn0050055	CG30055-RA
2R	8476606	8476755	FBgn0050055	CG30055-RA
2R	8479643	8480142	FBgn0022764;FBgn0022764;FBgn0022764	Sin3A-RA;Sin3A-RD;Sin3A-RB
2R	8519835	8520094	FBgn0053792	CG33792-RA
2R	8520583	8520691	FBgn0053792	CG33792-RA
2R	8521392	8521710	FBgn0061359;FBgn0061360	CG33671-RA;CG33672-RA
2R	8523573	8524031	FBgn0011604	Iswi-RA
2R	8592921	8593037	FBgn0033770;FBgn0033770	CG12442-RA;CG12442-RB
2R	8643584	8644295	FBgn0026741	mRpL18-RA
2R	8645038	8645269	FBgn0020930	Dgkepsilon-RA
2R	8756600	8757692	FBgn0033777	CG17574-RA
2R	8760246	8761559	FBgn0033778	CG3790-RA
2R	8762863	8763024	FBgn0033778	CG3790-RA
2R	8767312	8767861	FBgn0002069	Aats-asp-RA
2R	8771705	8772097	FBgn0003975	vg-RA
2R	8776426	8777338	FBgn0003975	vg-RA
2R	8787116	8787730	FBgn0003975	vg-RA
2R	8791750	8791902	FBgn0010488;FBgn0010488	NAT1-RA;NAT1-RC
2R	8811513	8812178	FBgn0033781;FBgn0033781	CG13319-RA;CG13319-RB
2R	8847371	8847732	FBgn0033787	CG13321-RA
2R	8867138	8867602	FBgn0005624	Psc-RA
2R	8910499	8911593	FBgn0033788	CG13323-RA
2R	8919836	8920232	FBgn0033788	CG13323-RA
2R	9020191	9020668	FBgn0259876;FBgn0259876	Cap-G-RF;Cap-G-RG
2R	9052826	9053186	FBgn0033799	GLaz-RA
2R	9086597	9086992	FBgn0027079	Aats-val-RA
2R	9093033	9094087	FBgn0005654;FBgn0085344	lat-RA;CG34315-RB
2R	9094546	9095750	FBgn0033806;FBgn0033806	CG4616-RA;CG4616-RB
2R	9118102	9118787	FBgn0033813	CG12765-RA
2R	9122037	9122357	FBgn0033815	CG4676-RA
2R	9340453	9340640	FBgn0086757	cbs-RA
2R	9352632	9353159	FBgn0086757	cbs-RA
2R	9363132	9363985	FBgn0000119	arr-RA
2R	9427660	9427938	FBgn0033853	CG6145-RB
2R	9440716	9440874	FBgn0053156	CG33156-RF
2R	9475162	9475428	FBgn0027581	CG6191-RA
2R	9480499	9480900	FBgn0027581	CG6191-RA
2R	9742956	9743506	FBgn0033880	CG6553-RA
2R	9749248	9749641	FBgn0033884	CG13344-RA
2R	9821957	9822402	FBgn0013733;FBgn0013733;FBgn0013733;FBgn0013733;FBgn0013733;FBgn0013733	shot-RG;shot-RB;shot-RI;shot-RJ;shot-RK;shot-RN
2R	9828894	9829261	FBgn0013733;FBgn0013733;FBgn0013733;FBgn0013733;FBgn0013733;FBgn0013733	shot-RG;shot-RB;shot-RI;shot-RJ;shot-RK;shot-RN
2R	9841321	9841472	FBgn0026611	AGO1-RB
2R	9844984	9845965	FBgn0026611	AGO1-RC
2R	9851633	9851930	FBgn0013770	Cp1-RC
2R	9868346	9870187	FBgn0033890	CG13350-RA
2R	9878617	9878846	FBgn0002643	mam-RA
2R	9879251	9879716	FBgn0002643	mam-RA
2R	10028291	10028908	FBgn0040752	Prosap-RA
2R	10045178	10045454	FBgn0033899	CG13016-RA
2R	10048527	10048686	FBgn0033900	CG8257-RA
2R	10054098	10055631	FBgn0033904	CG18327-RA
2R	10056430	10057840	FBgn0033905	CG18324-RA
2R	10063170	10063292	FBgn0000289	cg-RF
2R	10092724	10093185	FBgn0050071	CG30071-RA
2R	10095539	10095823	FBgn0005613	Sox15-RA
2R	10127258	10127417	FBgn0033916	CG8494-RA
2R	10133328	10133642	FBgn0010241	Mdr50-RA
2R	10137550	10138163	FBgn0010241	Mdr50-RA
2R	10152736	10152892	FBgn0033919	CG8547-RD
2R	10202709	10203033	FBgn0085408	Shroom-RD
2R	10203188	10203415	FBgn0085408	Shroom-RD
2R	10368016	10368288	FBgn0001332	L-RA
2R	10372718	10372841	FBgn0001332	L-RA
2R	10377671	10378198	FBgn0001332	L-RA
2R	10492269	10492982	FBgn0033945	CG12868-RB
2R	10507829	10508492	FBgn0033948	CG12863-RA
2R	10639622	10639968	FBgn0050476	ave-RA
2R	10657269	10657668	FBgn0259112	CG42254-RB
2R	10658165	10658353	FBgn0015602	BEAF-32-RB
2R	10745404	10745601	FBgn0053506	CG33506-RA
2R	10851579	10852144	FBgn0033987	CG12424-RA
2R	10874347	10874658	FBgn0033989	CG7639-RB
2R	10879481	10879925	FBgn0033989	CG7639-RB
2R	10914798	10915197	FBgn0043530	Obp51a-RA
2R	11032775	11033132	FBgn0085215	CG34186-RA
2R	11033679	11035218	FBgn0033994;FBgn0033994	CG7544-RA;CG7544-RB
2R	11101452	11101909	FBgn0033999	CG8093-RA
2R	11102105	11102695	FBgn0033999	CG8093-RA
2R	11102845	11103237	FBgn0033999	CG8093-RA
2R	11113553	11113991	FBgn0001187	Hex-C-RA
2R	11259173	11259818	FBgn0011660	Pms2-RA
2R	11269110	11269280	FBgn0026370	SRPK-RB
2R	11429044	11429534	FBgn0022097	Vha36-RA
2R	11430342	11430699	FBgn0034029	eIF2B-gamma-RA
2R	11459119	11460175	FBgn0050466	CG30466-RA
2R	11568185	11569836	FBgn0050091	CG30091-RA
2R	11626768	11627404	FBgn0050089	CG30089-RA
2R	11627993	11628154	FBgn0050089	CG30089-RA
2R	11704575	11705013	FBgn0083919	Zasp52-RC
2R	11705252	11705490	FBgn0083919	Zasp52-RC
2R	11749515	11749828	FBgn0022160	Gpo-1-RB
2R	11756488	11756609	FBgn0050085	CG30085-RA
2R	11880351	11880471	FBgn0034059	CG8320-RA
2R	11905434	11905869	FBgn0034067	CG8399-RA
2R	11991576	11991846	FBgn0014020	Rho1-RD
2R	12029287	12029405	FBgn0050094	CG30094-RA
2R	12030035	12030383	FBgn0027091	Aats-cys-RA
2R	12035770	12036035	FBgn0029175;FBgn0034081	Ext2-RA;CG10731-RA
2R	12037709	12037833	FBgn0029175;FBgn0034081	Ext2-RA;CG10731-RA
2R	12041278	12041547	FBgn0034082	CG10734-RA
2R	12041700	12041822	FBgn0034082	CG10734-RA
2R	12042913	12043218	FBgn0034082	CG10734-RA
2R	12043712	12044170	FBgn0034082	CG10734-RA
2R	12065085	12065796	FBgn0015754;FBgn0015754;FBgn0015754;FBgn0015754	Lis-1-RA;Lis-1-RC;Lis-1-RD;Lis-1-RE
2R	12066509	12066927	FBgn0015754	Lis-1-RB
2R	12073452	12074667	FBgn0034087	CG8443-RA
2R	12117791	12118462	FBgn0034095	CG15701-RA
2R	12162362	12162563	FBgn0053017	CG33017-RB
2R	12177811	12178431	FBgn0050100;FBgn0259718;FBgn0259718	CG30100-RA;CG42372-RA;CG42372-RB
2R	12209376	12210209	FBgn0034114	CG4282-RA
2R	12223772	12223938	FBgn0020611;FBgn0020611	Vha44-RA;Vha44-RF
2R	12231456	12231862	FBgn0034117	CG7997-RB
2R	12481734	12481967	FBgn0034142	CG8306-RA
2R	12482119	12482237	FBgn0034142	CG8306-RA
2R	12612940	12613327	FBgn0050463;FBgn0050463;FBgn0050463;FBgn0050463	CG30463-RA;CG30463-RB;CG30463-RC;CG30463-RD
2R	12715442	12715755	FBgn0085489	CG34460-RA
2R	12718361	12718680	FBgn0085489	CG34460-RA
2R	12718895	12719500	FBgn0085489	CG34460-RA
2R	12727572	12728677	FBgn0026754	Ugt37c1-RA
2R	12755191	12755551	FBgn0028737	Ef1beta-RA
2R	12892205	12893559	FBgn0034179	CG6805-RA
2R	12903136	12903641	FBgn0034180	CG15609-RB
2R	12906865	12907139	FBgn0034181;FBgn0034181	CG8963-RA;CG8963-RC
2R	12914552	12915201	FBgn0023172;FBgn0023172;FBgn0023172	RhoGEF2-RE;RhoGEF2-RF;RhoGEF2-RD
2R	12915705	12915907	FBgn0023172;FBgn0023172;FBgn0023172	RhoGEF2-RE;RhoGEF2-RF;RhoGEF2-RD
2R	12944585	12946483	FBgn0086350	tef-RA
2R	13152978	13153176	FBgn0053197;FBgn0053197;FBgn0053197;FBgn0053197;FBgn0053197;FBgn0053197;FBgn0053197	mbl-RA;mbl-RB;mbl-RC;mbl-RD;mbl-RE;mbl-RF;mbl-RG
2R	13285767	13286164	FBgn0010620	Sip1-RA
2R	13307467	13308246	FBgn0022029;FBgn0022029;FBgn0022029;FBgn0022029	l(2)k01209-RA;l(2)k01209-RB;l(2)k01209-RC;l(2)k01209-RD
2R	13309740	13309858	FBgn0022029;FBgn0022029;FBgn0022029;FBgn0022029	l(2)k01209-RA;l(2)k01209-RB;l(2)k01209-RC;l(2)k01209-RD
2R	13341482	13342303	FBgn0034221	CG10764-RA
2R	13344138	13344915	FBgn0024196	robl-RA
2R	13349346	13349507	FBgn0028953	CG14478-RB
2R	13389227	13389662	FBgn0034228	CG14479-RA
2R	13390006	13390123	FBgn0034228	CG14479-RA
2R	13396210	13396766	FBgn0085222	CG34193-RA
2R	13405181	13405373	FBgn0034231	CG11419-RA
2R	13405948	13406378	FBgn0034232;FBgn0034232	CG4866-RA;CG4866-RB
2R	13427939	13429284	FBgn0034239	CG18631-RA
2R	13431306	13431930	FBgn0085223	CG34194-RA
2R	13432050	13432441	FBgn0028382	cyp33-RA
2R	13448294	13450195	FBgn0034242	CG14480-RA
2R	13451161	13452232	FBgn0034242	CG14480-RA
2R	13460287	13461180	FBgn0016701	Rab4-RC
2R	13468778	13470280	FBgn0034246	Dcr-2-RA
2R	13479526	13479843	FBgn0050105	CG30105-RA
2R	13512548	13512843	FBgn0004400	rhi-RA
2R	13557215	13557415	FBgn0050109	CG30109-RA
2R	13557613	13558213	FBgn0050109	CG30109-RA
2R	13570216	13571245	FBgn0016059	Sema-1b-RA
2R	13586144	13586689	FBgn0027872	rdgBbeta-RA
2R	13614508	13615046	FBgn0034266;FBgn0034266;FBgn0034267;FBgn0034267	CG4975-RA;CG4975-RB;CG4984-RB;CG4984-RD
2R	13615893	13616042	FBgn0034267;FBgn0034267	CG4984-RA;CG4984-RC
2R	13634710	13634825	FBgn0003545	sub-RA
2R	13637230	13637460	FBgn0034275	CG5002-RA
2R	13672530	13673286	FBgn0026309	aft-RA
2R	13689359	13689479	FBgn0259211;FBgn0259211;FBgn0259211;FBgn0259211	grh-RI;grh-RJ;grh-RH;grh-RL
2R	13691796	13692150	FBgn0259211;FBgn0259211;FBgn0259211;FBgn0259211	grh-RI;grh-RJ;grh-RH;grh-RL
2R	13738157	13738284	FBgn0041585;FBgn0041585	olf186-F-RC;olf186-F-RA
2R	13982440	13982776	FBgn0034300	CG5098-RA
2R	14013748	14014068	FBgn0028983	Spn6-RA
2R	14015943	14016920	FBgn0040465	Dip3-RA
2R	14023080	14023363	FBgn0003044	Pcl-RA
2R	14027678	14027851	FBgn0003031	pAbp-RE
2R	14044533	14044804	FBgn0022238	lolal-RD
2R	14045515	14046169	FBgn0034307	CG10914-RA
2R	14060209	14060953	FBgn0034312	CG10916-RA
2R	14120103	14120452	FBgn0000658	fj-RA
2R	14156493	14157288	FBgn0003022	Ote-RA
2R	14157836	14158367	FBgn0003022	Ote-RA
2R	14178891	14179064	FBgn0034321	CG14502-RB
2R	14179221	14179345	FBgn0034321	CG14502-RB
2R	14179657	14180511	FBgn0034321	CG14502-RB
2R	14192472	14192594	FBgn0034327	CG14505-RB
2R	14193096	14194248	FBgn0034327	CG14505-RB
2R	14194363	14194679	FBgn0034327	CG14505-RB
2R	14195497	14195632	FBgn0040737	Tango8-RA
2R	14196715	14196879	FBgn0040737	Tango8-RA
2R	14199999	14200158	FBgn0040737	Tango8-RA
2R	14217604	14218247	FBgn0040737	Tango8-RA
2R	14220502	14220662	FBgn0040737	Tango8-RA
2R	14232003	14233563	FBgn0010575;FBgn0010575;FBgn0010575	sbb-RD;sbb-RE;sbb-RF
2R	14243703	14245637	FBgn0010575	sbb-RG
2R	14314195	14314391	FBgn0034346	CG12263-RA
2R	14328399	14328707	FBgn0026173;FBgn0026173	slim-RB;slim-RA
2R	14339362	14339521	FBgn0034351	CG5190-RA
2R	14501853	14502044	FBgn0034361	mRpS28-RA
2R	14502157	14503210	FBgn0034362	CG5323-RA
2R	14506878	14507066	FBgn0034364	CG5493-RA
2R	14512103	14512415	FBgn0034366;FBgn0034366	Atg7-RB;Atg7-RA
2R	14559888	14560321	FBgn0023214	edl-RA
2R	14738608	14738912	FBgn0034402	CG15084-RA
2R	14858518	14859029	FBgn0014269	prod-RA
2R	14859493	14859991	FBgn0041702	CG15107-RA
2R	15024534	15025323	FBgn0034419;FBgn0034419	CG15111-RB;CG15111-RA
2R	15030666	15030833	FBgn0034418	CG15118-RC
2R	15115542	15115739	FBgn0034422	CG7137-RA
2R	15115850	15116086	FBgn0010434;FBgn0010434;FBgn0010434;FBgn0010434	cora-RB;cora-RA;cora-RC;cora-RE
2R	15171738	15172066	FBgn0034426	CG10476-RA
2R	15177379	15177894	FBgn0013954	FK506-bp2-RA
2R	15180641	15180766	FBgn0086358	Tab2-RA
2R	15244441	15245099	FBgn0034436	CG11961-RB
2R	15283385	15284260	FBgn0034443	cer-RA
2R	15343706	15344153	FBgn0002716	mei-W68-RA
2R	15355047	15356065	FBgn0260934;FBgn0260934;FBgn0260934;FBgn0260934;FBgn0260934;FBgn0260934	par-1-RC;par-1-RG;par-1-RM;par-1-RP;par-1-RR;par-1-RT
2R	15356177	15356299	FBgn0260934;FBgn0260934;FBgn0260934;FBgn0260934;FBgn0260934;FBgn0260934	par-1-RC;par-1-RG;par-1-RM;par-1-RP;par-1-RR;par-1-RT
2R	15373455	15373761	FBgn0034451	CG11242-RA
2R	15374752	15375259	FBgn0034451	CG11242-RA
2R	15507428	15507697	FBgn0003435;FBgn0003435;FBgn0003435	sm-RA;sm-RE;sm-RH
2R	15557828	15558254	FBgn0028372	isopeptidase-T-3-RA
2R	15735753	15736418	FBgn0043532	Obp56i-RA
2R	15790209	15790329	FBgn0034477	CG13872-RA
2R	15837583	15838122	FBgn0034478	CG10822-RA
2R	15856525	15856794	FBgn0034479	CG8654-RA
2R	15962123	15963229	FBgn0004364	18w-RA
2R	16133350	16133502	FBgn0034488	CG11208-RA
2R	16133929	16134293	FBgn0034489	ppk6-RA
2R	16150666	16151056	FBgn0003114	plu-RA
2R	16167211	16167520	FBgn0034497	CG9090-RA
2R	16195789	16196064	FBgn0034500	CG11200-RB
2R	16206937	16207436	FBgn0027529;FBgn0027529	CG8920-RB;CG8920-RD
2R	16469280	16469434	FBgn0028622	l(2)05510-RA
2R	16474259	16474607	FBgn0034523	Nnf1a-RA
2R	16504886	16505409	FBgn0050147	Hil-RB
2R	16555313	16555736	FBgn0034542	Fem-1-RA
2R	16555895	16556814	FBgn0000615;FBgn0000615	exu-RB;exu-RC
2R	16801665	16802106	FBgn0020617	Rx-RA
2R	16883911	16884578	FBgn0034570;FBgn0034570;FBgn0034570	CG10543-RB;CG10543-RA;CG10543-RC
2R	16884846	16885083	FBgn0034570;FBgn0034570;FBgn0034570	CG10543-RB;CG10543-RA;CG10543-RC
2R	16905006	16905681	FBgn0050296;FBgn0050296;FBgn0050296;FBgn0050296;FBgn0050296;FBgn0050296;FBgn0050296;FBgn0050296;FBgn0050296;FBgn0050296;FBgn0050296;FBgn0050296;FBgn0050296;FBgn0050296	CG30296-RD;CG30296-RC;CG30296-RE;CG30296-RH;CG30296-RI;CG30296-RJ;CG30296-RK;CG30296-RL;CG30296-RM;CG30296-RN;CG30296-RO;CG30296-RP;CG30296-RQ;CG30296-RR
2R	16906097	16906340	FBgn0050296	CG30296-RG
2R	16906538	16906693	FBgn0050296	CG30296-RG
2R	16920493	16920610	FBgn0034576	CG9350-RA
2R	16935526	16935924	FBgn0003391	shg-RA
2R	16944684	16944798	FBgn0034577	cpa-RA
2R	16963324	16963517	FBgn0003748	Treh-RD
2R	17029889	17030632	FBgn0034592	CG9406-RA
2R	17034029	17034344	FBgn0026582	CG9418-RA
2R	17067755	17068912	FBgn0003162;FBgn0003162	Pu-RC;Pu-RA
2R	17070752	17070946	FBgn0003891	tud-RA
2R	17178916	17179433	FBgn0050392	CG30392-RA
2R	17180041	17180512	FBgn0050390	CG30390-RA
2R	17182650	17183617	FBgn0050387;FBgn0050387;FBgn0050387	CG30387-RI;CG30387-RC;CG30387-RF
2R	17199210	17199332	FBgn0034618;FBgn0034618;FBgn0034618	CG9485-RA;CG9485-RD;CG9485-RE
2R	17201760	17202312	FBgn0034618	CG9485-RC
2R	17269965	17270343	FBgn0034626	CG10795-RA
2R	17273184	17273621	FBgn0034627	EfSec-RA
2R	17430453	17430995	FBgn0260477	CG30283-RB
2R	17457638	17457841	FBgn0034636	CG10440-RA
2R	17504730	17505238	FBgn0042180	CG18870-RA
2R	17521972	17522822	FBgn0034643	CG10321-RA
2R	17549020	17549254	FBgn0034647	pirk-RA
2R	17553588	17554132	FBgn0259711	CG42365-RA
2R	17621723	17622200	FBgn0034657	LBR-RC
2R	17751206	17752181	FBgn0034667	comr-RA
2R	17759684	17759838	FBgn0085397	Fili-RC
2R	17785925	17786533	FBgn0025573	PpN58A-RA
2R	17948454	17948690	FBgn0259142;FBgn0259142	CG42257-RD;CG42257-RE
2R	18009939	18010140	FBgn0243516	Vrp1-RB
2R	18198864	18199213	FBgn0034718;FBgn0034718	wdp-RD;wdp-RB
2R	18205092	18205977	FBgn0013272	Gp150-RC
2R	18433339	18433698	FBgn0003175;FBgn0003175	px-RB;px-RC
2R	18446491	18446878	FBgn0003175	px-RA
2R	18447115	18447238	FBgn0003175	px-RA
2R	18457724	18458031	FBgn0034737	CG11362-RA
2R	18577153	18577595	FBgn0020257	ppa-RA
2R	18694355	18694472	FBgn0000405;FBgn0000405	CycB-RD;CycB-RA
2R	18773396	18773512	FBgn0034792	CG3499-RB
2R	18773669	18774272	FBgn0034793	asrij-RA
2R	18910777	18911171	FBgn0034810	CG9895-RA
2R	18962814	18962932	FBgn0034816	CG3085-RA
2R	19124959	19125199	FBgn0034835	CG3092-RA
2R	19130241	19130999	FBgn0040063;FBgn0040063	yip3-RA;yip3-RB
2R	19243504	19244012	FBgn0034849	CG3500-RA
2R	19244923	19246148	FBgn0034850	CG9875-RB
2R	19272042	19273697	FBgn0050414;FBgn0050414	CG30414-RA;CG30414-RB
2R	19410938	19411606	FBgn0034873	CG5360-RA
2R	19430126	19430440	FBgn0041234	Gr59f-RA
2R	19468012	19468175	FBgn0015903	apt-RA
2R	19468687	19468814	FBgn0015903	apt-RA
2R	19589119	19589772	FBgn0034894;FBgn0034894	CG4091-RA;CG4091-RC
2R	19633708	19634257	FBgn0000562	egl-RB
2R	19699171	19699433	FBgn0028411	Nxt1-RA
2R	19705501	19705821	FBgn0034909;FBgn0034909	CG4797-RB;CG4797-RA
2R	19738895	19739087	FBgn0024234	gbb-RA
2R	19752127	19752242	FBgn0025335	CG4585-RA
2R	19752774	19753087	FBgn0034919	CG5569-RA
2R	19756204	19756746	FBgn0025352	Thiolase-RA
2R	19757243	19757786	FBgn0011236	ken-RA
2R	19765778	19766965	FBgn0020372;FBgn0020372	TM4SF-RA;TM4SF-RB
2R	19770462	19773327	FBgn0025334	PHDP-RA
2R	19773759	19775228	FBgn0034920	CG5597-RA
2R	19775423	19775780	FBgn0034921	Dcp1-RA
2R	19782741	19783636	FBgn0034924	CG17658-RA
2R	19784100	19784223	FBgn0034925	CG5339-RA
2R	19794967	19795399	FBgn0015268	Nap1-RA
2R	19821578	19823420	FBgn0004551	Ca-P60A-RE
2R	19828277	19828717	FBgn0023477	Tal-RA
2R	19835690	19836348	FBgn0034935	CG13565-RA
2R	19840467	19840766	FBgn0034938	CG3803-RA
2R	19844629	19845898	FBgn0029105	alpha-catenin-related-RA
2R	19846452	19848147	FBgn0029105	alpha-catenin-related-RA
2R	19850149	19852016	FBgn0034943	Fmo-1-RA
2R	19858110	19858780	FBgn0034946;FBgn0034946;FBgn0034946	CG3065-RC;CG3065-RB;CG3065-RA
2R	19864370	19864765	FBgn0034948	CG3825-RA
2R	19865533	19866564	FBgn0005612	Sox14-RA
2R	19875778	19877753	FBgn0034950	CG3105-RA
2R	19877901	19878361	FBgn0034950	CG3105-RA
2R	19909194	19911202	FBgn0034959	CG11388-RA
2R	19911894	19912255	FBgn0022708	Adk2-RA
2R	19916253	19916688	FBgn0061198	HSPC300-RA
2R	19921293	19921951	FBgn0034962;FBgn0034962	MAN1-RA;MAN1-RB
2R	19924843	19925602	FBgn0034964	CG3173-RA
2R	19936899	19937556	FBgn0003353;FBgn0003353	sei-RA;sei-RB
2R	19940791	19941296	FBgn0034966	CG13563-RB
2R	19942739	19945249	FBgn0034965;FBgn0034965	CG13568-RE;CG13568-RG
2R	19949614	19949997	FBgn0023170	RpL39-RA
2R	19950903	19951100	FBgn0025806;FBgn0025806	Rap2l-RA;Rap2l-RB
2R	19955593	19956025	FBgn0034971;FBgn0034971	CG3209-RB;CG3209-RC
2R	19956384	19956543	FBgn0034971;FBgn0034971	CG3209-RB;CG3209-RC
2R	19969582	19969852	FBgn0034974	CG16786-RA
2R	19974133	19974244	FBgn0086129	snama-RA
2R	20050109	20050751	FBgn0034985	CG3328-RA
2R	20074361	20075107	FBgn0034987	CG3363-RA
2R	20230110	20230836	FBgn0004101;FBgn0004101	bs-RA;bs-RB
2R	20402444	20403199	FBgn0019886	CG4589-RB
2R	20413520	20413831	FBgn0050169	Brca2-RA
2R	20418033	20418808	FBgn0035020	CG13585-RA
2R	20459194	20459621	FBgn0035027	CG3511-RA
2R	20548565	20548768	FBgn0035044	CG3663-RA
2R	20549433	20551101	FBgn0050163	Cpr60D-RA
2R	20555014	20555617	FBgn0260456	CG4806-RA
2R	20667295	20669698	FBgn0035063	Eap-RA
2R	20675219	20675418	FBgn0041205	key-RA
2R	20701458	20702086	FBgn0000157;FBgn0000157;FBgn0000157	Dll-RB;Dll-RA;Dll-RC
2R	20724204	20724597	FBgn0035070	CG3650-RA
2R	20724760	20725345	FBgn0035070	CG3650-RA
2R	20763883	20764887	FBgn0050420	Atf-2-RB
2R	20824180	20824296	FBgn0043792;FBgn0043792	CG30427-RD;CG30427-RF
2R	20842863	20843272	FBgn0035087	CG2765-RC
2R	20852082	20852392	FBgn0035087	CG2765-RA
2R	20853039	20853717	FBgn0050424;FBgn0050424	CG30424-RC;CG30424-RD
2R	20854020	20854422	FBgn0050424;FBgn0050424	CG30424-RC;CG30424-RD
2R	20860130	20860756	FBgn0035089	Phk-3-RA
2R	20896640	20896842	FBgn0005634;FBgn0005634	zip-RA;zip-RD
2R	20939624	20939982	FBgn0001147	gsb-n-RA
3L	73426	73901	FBgn0035097	CG13405-RA
3L	128740	129138	FBgn0020386	Pk61C-RD
3L	131502	131623	FBgn0020386	Pk61C-RA
3L	146353	146785	FBgn0035099;FBgn0035099;FBgn0035099	CG6845-RC;CG6845-RD;CG6845-RE
3L	160568	160925	FBgn0035101	p130CAS-RG
3L	184516	184982	FBgn0027786;FBgn0027786;FBgn0027786	Mtch-RB;Mtch-RA;Mtch-RC
3L	206212	206415	FBgn0035109	CG13876-RA
3L	211887	212663	FBgn0035111	CG16940-RB
3L	222017	223414	FBgn0035113	pyx-RA
3L	246827	247145	FBgn0052476	mthl14-RA
3L	247722	248521	FBgn0052476	mthl14-RA
3L	258422	258547	FBgn0035120	wac-RC
3L	263119	263310	FBgn0035121	Tudor-SN-RA
3L	263433	263748	FBgn0035121	Tudor-SN-RA
3L	264537	264658	FBgn0035122	mRpL17-RA
3L	264769	265089	FBgn0035122	mRpL17-RA
3L	329348	329553	FBgn0035133	Ptpmeg-RB
3L	347331	347490	FBgn0035133;FBgn0035133;FBgn0035133	Ptpmeg-RA;Ptpmeg-RE;Ptpmeg-RF
3L	441516	441906	FBgn0001316	klar-RC
3L	489901	490341	FBgn0085296	CG34267-RA
3L	552695	552969	FBgn0035142	hipk-RA
3L	607756	607953	FBgn0016715	Reg-2-RA
3L	608136	608331	FBgn0016715	Reg-2-RA
3L	609088	609333	FBgn0016715	Reg-2-RA
3L	618274	618984	FBgn0016715	Reg-2-RA
3L	619362	619595	FBgn0016715	Reg-2-RA
3L	620418	621404	FBgn0016715	Reg-2-RA
3L	621989	622301	FBgn0016715	Reg-2-RA
3L	627337	627821	FBgn0035147	CG12030-RA
3L	628579	628694	FBgn0035147	CG12030-RA
3L	640143	640336	FBgn0035147	CG12030-RA
3L	654156	654396	FBgn0035150	Rev1-RA
3L	667089	667884	FBgn0035151	CG17129-RA
3L	680967	682449	FBgn0035152	CG3386-RA
3L	686933	687124	FBgn0035154	CG3344-RA
3L	687746	688206	FBgn0035154	CG3344-RA
3L	694242	694559	FBgn0260862	Vti1-RA
3L	709838	710230	FBgn0025676	CkIIalpha-i3-RB
3L	726180	726306	FBgn0035160	CG13897-RA
3L	727792	728312	FBgn0035160	CG13897-RA
3L	748840	749270	FBgn0000575	emc-RA
3L	760875	761289	FBgn0000575	emc-RA
3L	840419	841121	FBgn0035166	CG13902-RB
3L	848089	848407	FBgn0035169	CG13890-RA
3L	850074	850716	FBgn0035169	CG13890-RA
3L	1030589	1030948	FBgn0024277	trio-RC
3L	1031612	1032521	FBgn0024277	trio-RC
3L	1088012	1088202	FBgn0004870;FBgn0004870	bab1-RB;bab1-RA
3L	1090443	1091326	FBgn0004870;FBgn0004870	bab1-RB;bab1-RA
3L	1091445	1091690	FBgn0004870;FBgn0004870	bab1-RB;bab1-RA
3L	1096089	1097012	FBgn0004870;FBgn0004870	bab1-RB;bab1-RA
3L	1245620	1245857	FBgn0004378	Klp61F-RA
3L	1302892	1303134	FBgn0035203	CG9149-RA
3L	1313831	1314226	FBgn0035207	CG9153-RA
3L	1318737	1318972	FBgn0010246	Myo61F-RC
3L	1334889	1335156	FBgn0035211	CG2211-RA
3L	1349457	1350119	FBgn0003138;FBgn0003138	Ptp61F-RB;Ptp61F-RA
3L	1517143	1517304	FBgn0261243	Psa-RB
3L	1559342	1559503	FBgn0035232	CG12099-RA
3L	1639909	1640175	FBgn0013753	Bgb-RA
3L	1730097	1730801	FBgn0027594;FBgn0027594	drpr-RB;drpr-RA
3L	1735846	1736115	FBgn0035264	Oseg4-RA
3L	1736236	1736967	FBgn0035265	CG18173-RA
3L	1774400	1774965	FBgn0035270	CG13933-RA
3L	1798491	1798678	FBgn0067864;FBgn0067864;FBgn0067864	Patj-RC;Patj-RA;Patj-RB
3L	1814058	1814457	FBgn0027790;FBgn0027790	GV1-RA;GV1-RB
3L	1876408	1876655	FBgn0002183;FBgn0002183	dre4-RB;dre4-RA
3L	2392851	2393012	FBgn0052298;FBgn0052299	CG32298-RB;CG32299-RB
3L	2553723	2553971	FBgn0010905	Spn-RA
3L	2589343	2589858	FBgn0016794;FBgn0016794	dos-RB;dos-RA
3L	2635138	2635527	FBgn0035357	MEP-1-RD
3L	2766401	2766927	FBgn0035370	CG1240-RA
3L	2772957	2773889	FBgn0035372	CG12093-RA
3L	2774175	2774877	FBgn0044452	Atg2-RA
3L	2782725	2783226	FBgn0035375	pgant6-RB
3L	2808635	2808975	FBgn0035376	CG2083-RB
3L	2823427	2823670	FBgn0035376	CG2083-RB
3L	2823783	2824175	FBgn0035377	CG14952-RA
3L	2831420	2832105	FBgn0035377	CG14952-RA
3L	2834029	2835237	FBgn0035377	CG14952-RA
3L	2837285	2837394	FBgn0035377	CG14952-RA
3L	2837522	2838028	FBgn0035377	CG14952-RA
3L	2867612	2867737	FBgn0035378	CG9973-RB
3L	3035533	3035741	FBgn0035388	CG2162-RA
3L	3053064	3054195	FBgn0035392;FBgn0035392	CG1271-RA;CG1271-RD
3L	3055177	3055372	FBgn0035393	CG16753-RA
3L	3075379	3075926	FBgn0035397;FBgn0035397;FBgn0035397	CG11486-RB;CG11486-RC;CG11486-RO
3L	3162465	3162774	FBgn0024194	rasp-RA
3L	3164145	3165200	FBgn0052280	CG32280-RA
3L	3174511	3174669	FBgn0035409	CG14963-RA
3L	3178066	3178925	FBgn0035411;FBgn0035411	CG12734-RA;CG12734-RB
3L	3179265	3179389	FBgn0035411;FBgn0035411	CG12734-RA;CG12734-RB
3L	3188446	3189953	FBgn0260430	CG42525-RA
3L	3192049	3192725	FBgn0001233	Hsp83-RA
3L	3217993	3218783	FBgn0035420	CG14967-RB
3L	3245899	3246154	FBgn0035426	CG12078-RA
3L	3303847	3303964	FBgn0035432;FBgn0035432;FBgn0035432;FBgn0035432	ZnT63C-RA;ZnT63C-RB;ZnT63C-RC;ZnT63C-RD
3L	3317867	3318603	FBgn0035435	CG12077-RB
3L	3336234	3336572	FBgn0052268	dro6-RA
3L	3376219	3376328	FBgn0035444	CG12012-RA
3L	3383651	3384323	FBgn0035445	CG12014-RA
3L	3385289	3385554	FBgn0035445	CG12014-RA
3L	3394909	3395147	FBgn0035445	CG12014-RA
3L	3418001	3418493	FBgn0014388	sty-RB
3L	3471414	3472001	FBgn0052267	CG32267-RA
3L	3473300	3473418	FBgn0052267	CG32267-RA
3L	3514348	3514635	FBgn0005640;FBgn0005640;FBgn0005640	Eip63E-RF;Eip63E-RD;Eip63E-RE
3L	3626333	3626449	FBgn0035454	CG12029-RB
3L	3770890	3771371	FBgn0052264;FBgn0052264;FBgn0052264	CG32264-RD;CG32264-RE;CG32264-RF
3L	3784848	3785518	FBgn0052264;FBgn0052264;FBgn0052264	CG32264-RD;CG32264-RE;CG32264-RF
3L	3805938	3806225	FBgn0035461	CG10855-RA
3L	3806627	3806793	FBgn0035462	CG1120-RA
3L	3806981	3807173	FBgn0035462	CG1120-RA
3L	3810038	3810967	FBgn0052263	CG32263-RA
3L	3814293	3814444	FBgn0004888	Scsalpha-RA
3L	3896891	3897635	FBgn0035469	CG14977-RA
3L	3897756	3899228	FBgn0035470	CG14980-RB
3L	3902887	3903999	FBgn0035471	Sc2-RA
3L	4003313	4003616	FBgn0035482	CG14985-RB
3L	4108477	4108907	FBgn0028484	Ack-RA
3L	4121544	4121820	FBgn0035499	Chd64-RB
3L	4135304	4135885	FBgn0260985	RfC4-RA
3L	4184803	4185500	FBgn0028664	VhaM9.7-1-RA
3L	4313866	4315201	FBgn0052251	CG32251-RA
3L	4403400	4403837	FBgn0035540	Syx17-RA
3L	4408230	4408668	FBgn0035542	CG11347-RD
3L	4409021	4409593	FBgn0035542	CG11347-RD
3L	4541827	4542032	FBgn0035558;FBgn0035558	CG11357-RA;CG11357-RC
3L	4542539	4542724	FBgn0035558;FBgn0035558	CG11357-RA;CG11357-RC
3L	4553780	4554279	FBgn0053777	CG33777-RA
3L	4626324	4626602	FBgn0015805	Rpd3-RA
3L	5127132	5127474	FBgn0035593	CG4603-RA
3L	5129539	5131147	FBgn0035591	CG4611-RA
3L	5132036	5133530	FBgn0035589	CG4618-RA
3L	5134320	5136705	FBgn0035587	CG4623-RA
3L	5139339	5139856	FBgn0028962	Aats-ala-m-RA
3L	5353240	5353860	FBgn0035600	CG4769-RA
3L	5555142	5555372	FBgn0029118;FBgn0029118	Sucb-RA;Sucb-RB
3L	5556074	5556264	FBgn0029118;FBgn0029118	Sucb-RA;Sucb-RB
3L	5556381	5556540	FBgn0029118;FBgn0029118	Sucb-RA;Sucb-RB
3L	5556861	5557017	FBgn0029121	Sras-RA
3L	5564383	5564864	FBgn0015766	Msr-110-RC
3L	5570987	5571099	FBgn0015766;FBgn0015766	Msr-110-RA;Msr-110-RB
3L	5600953	5601507	FBgn0035624	Eaf6-RA
3L	5763638	5763884	FBgn0260936;FBgn0260936	Usp36-RB;Usp36-RE
3L	5804420	5804731	FBgn0035639	CG5537-RA
3L	5846167	5846443	FBgn0003984;FBgn0003984	vn-RA;vn-RC
3L	5889985	5890255	FBgn0035644	Pole2-RA
3L	5891055	5891718	FBgn0035645	CG5592-RA
3L	5892179	5892297	FBgn0052409	CG32409-RA
3L	5920167	5920287	FBgn0053523	CG33523-RA
3L	6166548	6166708	FBgn0035688	CG10289-RA
3L	6210007	6210204	FBgn0002526	LanA-RA
3L	6435826	6436022	FBgn0035700	CG14910-RA
3L	6481042	6481541	FBgn0035702	CG10147-RA
3L	6489348	6489547	FBgn0020251;FBgn0020251	sfl-RA;sfl-RB
3L	6735371	6735814	FBgn0052393	dikar-RB
3L	6746289	6746406	FBgn0035714	CG8549-RA
3L	6810973	6811622	FBgn0086680	vvl-RA
3L	6811886	6812111	FBgn0086680	vvl-RA
3L	6867883	6867997	FBgn0041194	Prat2-RA
3L	6948437	6948694	FBgn0035720;FBgn0035720	CG10077-RA;CG10077-RC
3L	6948806	6949044	FBgn0035720;FBgn0035720	CG10077-RA;CG10077-RC
3L	6949790	6949986	FBgn0035721	CG9948-RA
3L	6950105	6950266	FBgn0035722	CG10075-RA
3L	6950468	6950704	FBgn0035722	CG10075-RA
3L	6951846	6952123	FBgn0029117	Surf1-RA
3L	6953373	6953493	FBgn0029117	Surf1-RA
3L	6958343	6960784	FBgn0035724	CG10064-RA
3L	7127400	7127635	FBgn0023001;FBgn0023001	melt-RB;melt-RC
3L	7130580	7131008	FBgn0023001;FBgn0023001	melt-RB;melt-RC
3L	7237520	7237877	FBgn0016036	mei-P22-RA
3L	7340585	7340886	FBgn0015298	Srp19-RA
3L	7363155	7363319	FBgn0082598;FBgn0082598	akirin-RA;akirin-RB
3L	7374948	7375178	FBgn0016983;FBgn0016983;FBgn0016983	smid-RB;smid-RA;smid-RC
3L	7427888	7428512	FBgn0014011	Rac2-RA
3L	7503460	7503801	FBgn0035793;FBgn0035793;FBgn0035793;FBgn0035793	CG7546-RA;CG7546-RB;CG7546-RC;CG7546-RD
3L	7606413	7606728	FBgn0035802	CG33275-RB
3L	7633170	7633364	FBgn0053276	CG33276-RB
3L	7797755	7798499	FBgn0052369	CG32369-RA
3L	7908562	7909188	FBgn0052368	CG32368-RA
3L	7969710	7970223	FBgn0035830	CG8209-RA
3L	7986596	7986875	FBgn0011817;FBgn0011817;FBgn0011817;FBgn0011817;FBgn0011817;FBgn0011817	nmo-RA;nmo-RB;nmo-RE;nmo-RC;nmo-RF;nmo-RG
3L	8115574	8116081	FBgn0035839	CG7550-RA
3L	8130627	8131539	FBgn0002899	mus301-RA
3L	8167460	8167904	FBgn0040290	RecQ4-RA
3L	8283126	8283365	FBgn0027569	CG7207-RA
3L	8283519	8284266	FBgn0027569	CG7207-RA
3L	8290421	8291317	FBgn0015793	Rab-RP3-RA
3L	8296236	8296355	FBgn0035868	CG7194-RA
3L	8297168	8297556	FBgn0087039	Sbp2-RA
3L	8301873	8302070	FBgn0035871;FBgn0035871	CG7188-RA;CG7188-RB
3L	8331940	8333290	FBgn0035876	CG7081-RA
3L	8362288	8362425	FBgn0001253;FBgn0001253	ImpE1-RA;ImpE1-RB
3L	8487006	8487313	FBgn0035899	CG6902-RA
3L	8499231	8500191	FBgn0035900	ZC3H3-RA
3L	8503066	8503563	FBgn0035901	CG6745-RA
3L	8508320	8509426	FBgn0035902	CG6683-RA
3L	8516956	8517882	FBgn0035907	CG6662-RA
3L	8537666	8538410	FBgn0035909;FBgn0035909	ergic53-RA;ergic53-RB
3L	8593805	8594289	FBgn0017579	RpL14-RA
3L	8649930	8650206	FBgn0035922	CG6486-RB
3L	8661641	8662094	FBgn0001168	h-RB
3L	8712843	8714136	FBgn0011509	SrpRbeta-RA
3L	8759766	8760458	FBgn0261259;FBgn0261259	Fhos-RA;Fhos-RB
3L	8813718	8814370	FBgn0011577	dally-RA
3L	8817714	8818986	FBgn0011577	dally-RA
3L	8820366	8820726	FBgn0011577	dally-RA
3L	8827015	8827318	FBgn0052026	CG32026-RA
3L	8905838	8905954	FBgn0035936;FBgn0035936	Tsp66E-RA;Tsp66E-RC
3L	8906071	8906185	FBgn0035936;FBgn0035936	Tsp66E-RA;Tsp66E-RC
3L	8946686	8947128	FBgn0035938	orb2-RB
3L	8948382	8949263	FBgn0040321	GNBP3-RA
3L	8958174	8960283	FBgn0035944;FBgn0035944;FBgn0035944	CG5021-RA;CG5021-RB;CG5021-RC
3L	8967457	8967656	FBgn0086706	pix-RA
3L	8968082	8968239	FBgn0035947	Srp68-RA
3L	8978274	8979368	FBgn0035950;FBgn0035950	CG5288-RA;CG5288-RB
3L	9353941	9354406	FBgn0085484	CG34455-RC
3L	9360653	9360903	FBgn0035981	CG4452-RC
3L	9403569	9403995	FBgn0035986	CG4022-RA
3L	9424109	9424382	FBgn0040305;FBgn0040305;FBgn0040305;FBgn0040305	MTF-1-RA;MTF-1-RB;MTF-1-RC;MTF-1-RD
3L	9444779	9445614	FBgn0052038	CG32038-RA
3L	9448888	9450186	FBgn0035999	CG3552-RD
3L	9451117	9451648	FBgn0035999	CG3552-RA
3L	9452746	9453912	FBgn0036000	CG3434-RA
3L	9454546	9454876	FBgn0052043;FBgn0052043;FBgn0052043	CG32043-RB;CG32043-RA;CG32043-RD
3L	9540467	9541205	FBgn0052048	CG32048-RA
3L	9541987	9542549	FBgn0052048	CG32048-RA
3L	9617606	9617832	FBgn0036018	CG3335-RA
3L	9671540	9671872	FBgn0016081;FBgn0016081;FBgn0016081	fry-RB;fry-RD;fry-RC
3L	9686023	9686312	FBgn0036030	CG6767-RB
3L	9689537	9689656	FBgn0036030	CG6767-RA
3L	9690914	9691234	FBgn0015321	UbcD4-RA
3L	9711250	9711791	FBgn0036035	CG18178-RA
3L	9847306	9847416	FBgn0004390;FBgn0004390	Gap1-RA;Gap1-RB
3L	9847736	9848536	FBgn0004390;FBgn0004390	Gap1-RA;Gap1-RB
3L	9852438	9853423	FBgn0036052	CG10809-RA
3L	9891606	9892288	FBgn0036058	CG6707-RA
3L	9965288	9965442	FBgn0036064;FBgn0036064;FBgn0036064;FBgn0259932;FBgn0259932	Ard1-RA;Ard1-RB;Ard1-RC;CG42455-RB;CG42455-RC
3L	10631162	10631400	FBgn0036090;FBgn0036090	CG8009-RA;CG8009-RB
3L	10659384	10659891	FBgn0010762;FBgn0010762;FBgn0010762	simj-RB;simj-RA;simj-RC
3L	10660128	10660287	FBgn0010762;FBgn0010762;FBgn0010762	simj-RB;simj-RA;simj-RC
3L	10731141	10731377	FBgn0036101	NijA-RA
3L	10732239	10732404	FBgn0036101	NijA-RA
3L	10732523	10732721	FBgn0036101	NijA-RA
3L	10733368	10733595	FBgn0036101	NijA-RA
3L	10752373	10752932	FBgn0036102	CG12523-RA
3L	10753048	10753475	FBgn0036102	CG12523-RA
3L	10753705	10754293	FBgn0036102	CG12523-RA
3L	10765208	10765535	FBgn0036102	CG12523-RA
3L	10845443	10845971	FBgn0026160	tna-RA
3L	10849824	10850127	FBgn0026160	tna-RA
3L	10850289	10851082	FBgn0026160	tna-RA
3L	10922365	10922483	FBgn0054050	CG34050-RA
3L	10927717	10928067	FBgn0054050	CG34050-RA
3L	10943854	10944126	FBgn0054050	CG34050-RA
3L	11003872	11003989	FBgn0013469	klu-RA
3L	11053489	11054247	FBgn0036117	CG6321-RA
3L	11054833	11055509	FBgn0052069	CG32069-RA
3L	11056086	11056445	FBgn0052069	CG32069-RA
3L	11087589	11089018	FBgn0036125	CG6279-RA
3L	11091540	11092165	FBgn0261112	APP-BP1-RA
3L	11111637	11112010	FBgn0036134	Mnf-RI
3L	11112456	11112881	FBgn0036134	Mnf-RH
3L	11157614	11158167	FBgn0052076	Alg10-RA
3L	11245385	11245663	FBgn0041094;FBgn0041094	scyl-RA;scyl-RB
3L	11315958	11316683	FBgn0036154	CG6168-RB
3L	11317867	11318255	FBgn0036154	CG6168-RB
3L	11318683	11319395	FBgn0036154	CG6168-RB
3L	11321633	11321955	FBgn0036154	CG6168-RB
3L	11336406	11336566	FBgn0036155	CG6163-RA
3L	11361577	11361691	FBgn0036155	CG6163-RA
3L	11362238	11363624	FBgn0036155	CG6163-RA
3L	11367034	11367710	FBgn0036155	CG6163-RA
3L	11377343	11377921	FBgn0036156	CG11726-RA
3L	11380434	11380585	FBgn0036156	CG11726-RA
3L	11554838	11555021	FBgn0259481	Mob2-RC
3L	11580501	11580821	FBgn0003292	rt-RA
3L	11621201	11621353	FBgn0042138	CG18815-RC
3L	11624222	11624420	FBgn0052091	CG32091-RB
3L	11677260	11677810	FBgn0036191;FBgn0036191;FBgn0036191	Sug-RE;Sug-RC;Sug-RD
3L	11684187	11684495	FBgn0036192;FBgn0036192	CG14133-RB;CG14133-RD
3L	11684650	11685528	FBgn0036193	CG14135-RB
3L	11701440	11701601	FBgn0036196	CG11658-RC
3L	11784165	11784740	FBgn0036206	CG5964-RA
3L	11785123	11786216	FBgn0036206	CG5964-RA
3L	11786765	11787274	FBgn0036207	CG10907-RA
3L	11808425	11808540	FBgn0036210	CG14130-RA
3L	11818518	11818745	FBgn0052095	CG32095-RA
3L	11825814	11826705	FBgn0000404	CycA-RA
3L	12089138	12089780	FBgn0036246	CG17154-RA
3L	12108938	12109413	FBgn0011335	l(3)j2D3-RA
3L	12118701	12119512	FBgn0036250	Ir68b-RA
3L	12122369	12123650	FBgn0002565	Lsp2-RA
3L	12131586	12131872	FBgn0036257	RhoGAP68F-RA
3L	12259173	12259456	FBgn0260941;FBgn0260941;FBgn0260941;FBgn0260941;FBgn0260941;FBgn0260941	app-RH;app-RI;app-RJ;app-RK;app-RL;app-RM
3L	12260977	12261249	FBgn0052100	CG32100-RA
3L	12270686	12271097	FBgn0036273	CG10426-RA
3L	12450061	12450181	FBgn0000625	eyg-RA
3L	12536568	12536846	FBgn0036301	CG4069-RA
3L	12550577	12550694	FBgn0036302;FBgn0036302;FBgn0036302;FBgn0036302	sowah-RD;sowah-RH;sowah-RG;sowah-RI
3L	12551055	12552159	FBgn0036302;FBgn0036302;FBgn0036302;FBgn0036302	sowah-RD;sowah-RH;sowah-RG;sowah-RI
3L	12686265	12687018	FBgn0014343;FBgn0014343	mirr-RA;mirr-RB
3L	12743068	12743521	FBgn0036305	CG10984-RC
3L	12767662	12768423	FBgn0052106	CG32106-RA
3L	12798314	12798615	FBgn0027534;FBgn0027534;FBgn0027534	CG11006-RA;CG11006-RB;CG11006-RC
3L	12842814	12843343	FBgn0036317;FBgn0036317	CG10948-RB;CG10948-RC
3L	12854800	12854914	FBgn0036320	CG10943-RA
3L	12855036	12855236	FBgn0036320	CG10943-RA
3L	12999796	13000981	FBgn0036330;FBgn0036330	CG11263-RA;CG11263-RB
3L	13001099	13001718	FBgn0036331;FBgn0036331	CG14117-RB;CG14117-RC
3L	13009583	13009775	FBgn0036334	CG11267-RA
3L	13011932	13012410	FBgn0036336	ste14-RA
3L	13029914	13030436	FBgn0036340	SRm160-RA
3L	13034160	13034781	FBgn0011284	RpS4-RA
3L	13045011	13045239	FBgn0036342	CG11279-RA
3L	13175662	13176003	FBgn0086916	snky-RA
3L	13176120	13176275	FBgn0086916	snky-RA
3L	13915563	13915809	FBgn0026376	Rgl-RC
3L	13918499	13918618	FBgn0026376;FBgn0026376	Rgl-RB;Rgl-RD
3L	13957436	13957862	FBgn0025874	Meics-RA
3L	13957978	13958886	FBgn0036389	ssp2-RA
3L	13986356	13986556	FBgn0250848	26-29-p-RA
3L	13990565	13990769	FBgn0036396	CG17359-RA
3L	13991528	13991955	FBgn0036396	CG17359-RA
3L	13992665	13992906	FBgn0036396	CG17359-RA
3L	13996015	13998009	FBgn0036398	CG9007-RA
3L	14024663	14024793	FBgn0036402	CG6650-RA
3L	14028759	14030048	FBgn0026418;FBgn0026418	Hsc70Cb-RA;Hsc70Cb-RB
3L	14030684	14031145	FBgn0026418	Hsc70Cb-RC
3L	14184193	14184479	FBgn0013718;FBgn0013718	nuf-RC;nuf-RA
3L	14268267	14268741	FBgn0001085	fz-RA
3L	14273852	14274395	FBgn0001085	fz-RA
3L	14483085	14483396	FBgn0087007	bbg-RE
3L	14544234	14544501	FBgn0036428;FBgn0036428	CG9238-RA;CG9238-RB
3L	14627620	14628900	FBgn0041604;FBgn0041604	dlp-RA;dlp-RB
3L	14753092	14753247	FBgn0013263	Trl-RF
3L	14755469	14755819	FBgn0036446	CG9384-RA
3L	14783679	14783878	FBgn0036451;FBgn0036451	CG9425-RA;CG9425-RB
3L	14962400	14962677	FBgn0026320	Tom-RA
3L	14966427	14966677	FBgn0000216	Brd-RA
3L	14970803	14971149	FBgn0036459	CG3349-RA
3L	14971621	14971781	FBgn0036459	CG3349-RA
3L	14980216	14980410	FBgn0002778	mnd-RA
3L	15097770	15098050	FBgn0036478;FBgn0036478	CG6854-RA;CG6854-RB
3L	15136534	15136956	FBgn0047178	CG32147-RA
3L	15173642	15173767	FBgn0036489	CG7011-RA
3L	15184520	15185894	FBgn0036490	CG6888-RA
3L	15205732	15206306	FBgn0036490	CG6888-RA
3L	15215726	15215947	FBgn0029114	Tollo-RA
3L	15240881	15241354	FBgn0029114	Tollo-RA
3L	15499873	15500233	FBgn0036502	CG7841-RA
3L	15501095	15501250	FBgn0036502	CG7841-RA
3L	15502049	15502481	FBgn0004052	Z600-RA
3L	15517022	15517205	FBgn0036505	CG7945-RA
3L	15525970	15526136	FBgn0004396;FBgn0004396	CrebA-RA;CrebA-RB
3L	15526256	15526485	FBgn0004396;FBgn0004396	CrebA-RA;CrebA-RB
3L	15547121	15547390	FBgn0087035	AGO2-RC
3L	15558773	15559660	FBgn0036511	CG6498-RA
3L	15603968	15604081	FBgn0036519	CG7650-RA
3L	15663990	15664659	FBgn0036527	CG7304-RA
3L	15692538	15693240	FBgn0041160	comm2-RA
3L	15721931	15722362	FBgn0010105	comm-RA
3L	15755551	15755906	FBgn0010105	comm-RA
3L	15756016	15756242	FBgn0010105	comm-RA
3L	15756467	15756623	FBgn0010105	comm-RA
3L	15809940	15811252	FBgn0015025	CkIIalpha-i1-RA
3L	15819229	15819498	FBgn0036534	Dcp2-RB
3L	15827287	15828352	FBgn0036537	CG18081-RA
3L	15830145	15830463	FBgn0036538	CG15715-RA
3L	15997643	15998034	FBgn0036556	CG5830-RA
3L	16009452	16009903	FBgn0036558	mib1-RA
3L	16016569	16017371	FBgn0044028;FBgn0044028	Notum-RA;Notum-RB
3L	16038878	16039118	FBgn0260635	th-RA
3L	16039580	16039929	FBgn0260635	th-RA
3L	16045510	16046012	FBgn0005536;FBgn0005536	Mbs-RG;Mbs-RK
3L	16082844	16083039	FBgn0036565	CG5235-RA
3L	16091105	16091303	FBgn0036568	CG5389-RA
3L	16098966	16099394	FBgn0036570	CG5222-RA
3L	16105837	16106264	FBgn0010280;FBgn0010280;FBgn0010280;FBgn0010280;FBgn0010280	Taf4-RA;Taf4-RC;Taf4-RD;Taf4-RE;Taf4-RF
3L	16124403	16124819	FBgn0036573	CG5161-RA
3L	16124931	16125323	FBgn0036574;FBgn0036574	CG16838-RC;CG16838-RD
3L	16157194	16157552	FBgn0053796	CG33796-RA
3L	16172515	16173299	FBgn0053795	CG33795-RA
3L	16208208	16209821	FBgn0036577	CG13073-RA
3L	16225072	16225583	FBgn0036581	MED10-RB
3L	16226359	16226979	FBgn0085275	CG34246-RA
3L	16350485	16350689	FBgn0036616	CG4893-RA
3L	16372201	16373256	FBgn0036621	roq-RA
3L	16373371	16374644	FBgn0036622	CG4753-RA
3L	16409613	16409928	FBgn0036629	CG4573-RA
3L	16476375	16476768	FBgn0004569	argos-RA
3L	16482532	16482684	FBgn0260388	CG42514-RC
3L	16574949	16575740	FBgn0028693	Rpn12-RA
3L	16580245	16580822	FBgn0052163	CG32163-RA
3L	16581326	16581706	FBgn0002283	l(3)73Ah-RA
3L	16589868	16590217	FBgn0042178	CG32165-RA
3L	16596025	16596276	FBgn0042177	CG32164-RA
3L	16603464	16603575	FBgn0002284	Pros26-RA
3L	16603682	16604140	FBgn0004465	Su(P)-RA
3L	16605714	16606176	FBgn0025558	CG4101-RA
3L	16653557	16653703	FBgn0260960	Baldspot-RB
3L	16666321	16666556	FBgn0040512;FBgn0040512	zetaCOP-RA;zetaCOP-RB
3L	16667414	16667720	FBgn0036652	CG13032-RA
3L	16799525	16799842	FBgn0036663	CG9674-RD
3L	16800275	16800384	FBgn0036663	CG9674-RD
3L	16800963	16801287	FBgn0021768	nudC-RA
3L	16838287	16838835	FBgn0036668	CG9715-RA
3L	16853897	16855792	FBgn0003250	Rh4-RA
3L	16978884	16979115	FBgn0027593;FBgn0027593	Exn-RB;Exn-RC
3L	17020964	17021366	FBgn0036689	CG7730-RC
3L	17036001	17036425	FBgn0036695	Papst2-RA
3L	17044138	17044494	FBgn0036697	rogdi-RA
3L	17414293	17414487	FBgn0027660	blot-RD
3L	17418591	17418823	FBgn0040793	CG7630-RA
3L	17421960	17422193	FBgn0053052	CG33052-RA
3L	17426369	17426730	FBgn0052174	CG32174-RB
3L	17458538	17459483	FBgn0036726	CG7603-RA
3L	17467816	17468278	FBgn0036728	CG7580-RA
3L	17469304	17469966	FBgn0085279	CG34250-RA
3L	17495007	17495516	FBgn0052185	CG32185-RA
3L	17526854	17527332	FBgn0259174;FBgn0259174	Nedd4-RE;Nedd4-RF
3L	17614974	17615303	FBgn0036741	CG7510-RA
3L	17637301	17638400	FBgn0004401;FBgn0004401;FBgn0004401	Pep-RA;Pep-RB;Pep-RC
3L	17646503	17646926	FBgn0052177;FBgn0052179	CG32177-RA;Krn-RA
3L	17647481	17647787	FBgn0036745	CG7484-RB
3L	17901366	17901571	FBgn0036771	CG14353-RA
3L	17905493	17905958	FBgn0036772	CG5290-RA
3L	18001170	18001325	FBgn0000568	Eip75B-RC
3L	18011833	18012110	FBgn0000568	Eip75B-RC
3L	18030745	18031176	FBgn0052192;FBgn0052192	CG32192-RB;CG32192-RC
3L	18099029	18099150	FBgn0036773	CG13698-RB
3L	18102802	18103000	FBgn0002901	mus304-RA
3L	18132572	18132896	FBgn0020300	gk-RB
3L	18180072	18180233	FBgn0003997	W-RA
3L	18185533	18186126	FBgn0003997	W-RA
3L	18186230	18186594	FBgn0036782	CG7320-RA
3L	18186783	18186982	FBgn0036782	CG7320-RA
3L	18187433	18188343	FBgn0036782	CG7320-RA
3L	18214323	18214570	FBgn0036782	CG7320-RA
3L	18226415	18226868	FBgn0036783	CheA75a-RA
3L	18228360	18228632	FBgn0036783	CheA75a-RA
3L	18228985	18229177	FBgn0036783	CheA75a-RA
3L	18396112	18396382	FBgn0011706	rpr-RA
3L	18619328	18619441	FBgn0036801	MYPT-75D-RA
3L	18666528	18666889	FBgn0042134	CG18811-RA
3L	18737535	18738586	FBgn0036810	CG6885-RA
3L	18739175	18739328	FBgn0036811	MED11-RA
3L	18793641	18794038	FBgn0001078	ftz-f1-RB
3L	18807263	18807378	FBgn0036815	l(3)neo26-RA
3L	18814557	18815017	FBgn0036815	l(3)neo26-RB
3L	18815885	18816008	FBgn0000261	Cat-RA
3L	18861016	18861753	FBgn0036819	CG6856-RA
3L	18863433	18863785	FBgn0085284	CG34255-RA
3L	18894197	18894663	FBgn0036826	CG3893-RA
3L	19034357	19034479	FBgn0002945	nkd-RA
3L	19035793	19036459	FBgn0002945	nkd-RA
3L	19040046	19040364	FBgn0002945	nkd-RA
3L	19072176	19072287	FBgn0036844	Mkp3-RB
3L	19091213	19091951	FBgn0036849	CG14079-RA
3L	19092995	19093112	FBgn0036850	CG10419-RA
3L	19160433	19161096	FBgn0016797	fz2-RC
3L	19162166	19162317	FBgn0016797	fz2-RC
3L	19165131	19165411	FBgn0016797	fz2-RB
3L	19176732	19177446	FBgn0016797	fz2-RB
3L	19187657	19188279	FBgn0016797	fz2-RB
3L	19247772	19248047	FBgn0036853	mRpL21-RA
3L	19439680	19440047	FBgn0023395	Chd3-RA
3L	19440150	19440457	FBgn0023395	Chd3-RA
3L	19552161	19552627	FBgn0036886	CG9300-RA
3L	19552745	19553663	FBgn0036886	CG9300-RA
3L	19611854	19612122	FBgn0029094	asf1-RA
3L	19614497	19615422	FBgn0036895	CG9392-RA
3L	19669313	19669592	FBgn0036900	CG8765-RA
3L	19671822	19671972	FBgn0036900	CG8765-RA
3L	19698191	19698420	FBgn0260653	serp-RB
3L	19794839	19795038	FBgn0260874	Ir76a-RC
3L	19798680	19800107	FBgn0036909	CG15881-RA
3L	19805422	19805699	FBgn0036910	Cyp305a1-RA
3L	19810841	19810997	FBgn0036911	Fibp-RD
3L	19827988	19828613	FBgn0052221	CG32221-RB
3L	19863482	19863946	FBgn0015796	Rab8-RA
3L	19888807	19889007	FBgn0014037;FBgn0014037	Su(Tpl)-RA;Su(Tpl)-RB
3L	19889442	19889711	FBgn0014037;FBgn0014037	Su(Tpl)-RA;Su(Tpl)-RB
3L	19901368	19902174	FBgn0014037;FBgn0014037	Su(Tpl)-RA;Su(Tpl)-RB
3L	19902710	19903429	FBgn0013591;FBgn0013591;FBgn0013591	Mi-2-RB;Mi-2-RA;Mi-2-RC
3L	19907081	19908090	FBgn0028695	Rpn1-RA
3L	19920634	19920794	FBgn0036920	CG8004-RA
3L	19985350	19985592	FBgn0013303;FBgn0013303	Nca-RA;Nca-RB
3L	19992140	19993613	FBgn0036927	CG7433-RA
3L	19997674	19997954	FBgn0036929;FBgn0036929	CG7668-RA;CG7668-RB
3L	19998601	19998911	FBgn0036929;FBgn0036929	CG7668-RA;CG7668-RB
3L	20234756	20235076	FBgn0036959	CG6951-RA
3L	20289705	20289823	FBgn0036964	CG6480-RA
3L	20340751	20340916	FBgn0036973	CG5585-RA
3L	20341413	20341564	FBgn0036974	eRF1-RF
3L	20355993	20356686	FBgn0036978	Toll-9-RA
3L	20368403	20368714	FBgn0001247	Ide-RB
3L	20368993	20370023	FBgn0036980	RhoBTB-RA
3L	20376738	20377150	FBgn0027565	CG5498-RB
3L	20377639	20377791	FBgn0011205	fbl-RB
3L	20424286	20425166	FBgn0029158	Las-RC
3L	20435580	20436370	FBgn0036993	CG5910-RA
3L	20466669	20467781	FBgn0036998	CG5969-RA
3L	20480314	20480753	FBgn0037001	CG6020-RA
3L	20514282	20514902	FBgn0037009	CG5104-RB
3L	20534232	20534423	FBgn0037012	Rcd2-RA
3L	20594337	20594708	FBgn0001323	knrl-RA
3L	20613753	20613954	FBgn0001323	knrl-RA
3L	20614621	20615089	FBgn0001323	knrl-RA
3L	20641840	20641957	FBgn0037014	CG13251-RA
3L	20688307	20688579	FBgn0001320	kni-RA
3L	20701627	20701981	FBgn0085289	CG34260-RA
3L	20723127	20724039	FBgn0037016	CG13252-RA
3L	20725101	20725365	FBgn0037016	CG13252-RA
3L	20763169	20763920	FBgn0037018	CG4042-RA
3L	20764547	20764785	FBgn0016696;FBgn0016696	Pitslre-RB;Pitslre-RC
3L	20770741	20772417	FBgn0037020	CG4289-RA
3L	20808296	20808919	FBgn0037028	CG3618-RA
3L	20834561	20835353	FBgn0037031;FBgn0037031	CG11456-RA;CG11456-RB
3L	20910787	20911358	FBgn0037035	CG10589-RA
3L	20924363	20924644	FBgn0037035	CG10589-RA
3L	20940460	20940580	FBgn0011591	fng-RA
3L	20941388	20941701	FBgn0011591	fng-RA
3L	21007123	21007565	FBgn0003415;FBgn0003415	skd-RD;skd-RE
3L	21007716	21007920	FBgn0003415;FBgn0003415	skd-RD;skd-RE
3L	21019779	21020199	FBgn0003415;FBgn0003415	skd-RD;skd-RE
3L	21050381	21050744	FBgn0026179	siz-RA
3L	21091795	21091912	FBgn0053285	CG33285-RA
3L	21092182	21093104	FBgn0053285	CG33285-RA
3L	21129064	21129503	FBgn0037051	CG10565-RA
3L	21189712	21190630	FBgn0085290	CG34261-RB
3L	21196387	21196620	FBgn0053056	CG33056-RA
3L	21209549	21210300	FBgn0028427	Ilk-RA
3L	21246174	21246502	FBgn0004865	Eip78C-RC
3L	21246658	21246890	FBgn0004865	Eip78C-RC
3L	21261690	21262594	FBgn0037064	CG9389-RA
3L	21270558	21270865	FBgn0012034	AcCoAS-RB
3L	21273773	21274555	FBgn0027945	ppl-RA
3L	21275532	21275841	FBgn0027945	ppl-RA
3L	21278619	21279136	FBgn0037065	CG12974-RA
3L	21298169	21298367	FBgn0037071	CG7632-RA
3L	21311794	21312094	FBgn0086913	Rab26-RB
3L	21374403	21374953	FBgn0261258	rgn-RA
3L	21375216	21375370	FBgn0261258	rgn-RA
3L	21377320	21378708	FBgn0261258	rgn-RA
3L	21382976	21383246	FBgn0261258	rgn-RA
3L	21426538	21426696	FBgn0005694;FBgn0005694	Aef1-RA;Aef1-RC
3L	21433987	21434143	FBgn0037082	CG5664-RA
3L	21434258	21434418	FBgn0037082	CG5664-RA
3L	21453188	21453682	FBgn0014143	croc-RA
3L	21483750	21484104	FBgn0037086	CG7202-RA
3L	21484669	21485339	FBgn0037086	CG7202-RA
3L	21490289	21490629	FBgn0015239;FBgn0015239;FBgn0015239;FBgn0015239	Hr78-RC;Hr78-RA;Hr78-RD;Hr78-RB
3L	21500651	21501126	FBgn0037092	M6-RA
3L	21508469	21509953	FBgn0037093	CG7597-RB
3L	21527148	21529125	FBgn0053289	CG33289-RA
3L	21529933	21530518	FBgn0015283	Pros54-RA
3L	21559085	21560578	FBgn0037101	CG7634-RA
3L	21562063	21563287	FBgn0052438;FBgn0052438;FBgn0052438	Smc5-RA;Smc5-RE;Smc5-RF
3L	21636893	21637210	FBgn0053291	CG33291-RA
3L	21637512	21637667	FBgn0053291	CG33291-RA
3L	21672855	21672963	FBgn0037117	CG11248-RB
3L	21721837	21722110	FBgn0037121	Rpb8-RA
3L	21796835	21797109	FBgn0000560	eg-RB
3L	21822142	21822974	FBgn0052448	CG32448-RB
3L	21833508	21834322	FBgn0037138;FBgn0037138	CG7145-RA;CG7145-RD
3L	21873118	21873290	FBgn0014362	mub-RE
3L	21873412	21873605	FBgn0014362	mub-RE
3L	21935314	21935833	FBgn0037141	DNApol-eta-RA
3L	22058058	22058503	FBgn0037149	CG14561-RA
3L	22159361	22159479	FBgn0037152	CG15374-RA
3L	22169722	22170576	FBgn0037152	CG15374-RA
3L	22171702	22171894	FBgn0037152	CG15374-RA
3L	22172410	22172683	FBgn0037152	CG15374-RA
3L	22256125	22256470	FBgn0015075	Ddx1-RA
3L	22260647	22260797	FBgn0004179;FBgn0004179;FBgn0004179	Csp-RA;Csp-RB;Csp-RC
3L	22374723	22374837	FBgn0004449;FBgn0004449	Ten-m-RB;Ten-m-RC
3L	22431823	22432170	FBgn0037162	CG11449-RA
3L	22437330	22438036	FBgn0037162	CG11449-RA
3L	22459600	22459752	FBgn0037164	CG11438-RA
3L	22710493	22711315	FBgn0052452;FBgn0052452	CG32452-RA;CG32452-RB
3L	22720697	22721010	FBgn0037184	CG14450-RA
3L	22815761	22816973	FBgn0027339;FBgn0027339	jim-RC;jim-RB
3L	22845050	22845281	FBgn0052462	CG32462-RA
3L	22857200	22857711	FBgn0053170	CG33170-RB
3L	22864884	22865044	FBgn0010348;FBgn0010348;FBgn0010348	Arf79F-RA;Arf79F-RF;Arf79F-RH
3L	22872521	22872752	FBgn0037202	Ssl1-RA
3L	23088928	23089316	FBgn0024733	Qm-RC
3L	23092663	23092991	FBgn0000258;FBgn0000258;FBgn0000258	CkIIalpha-RA;CkIIalpha-RB;CkIIalpha-RC
3L	23707488	23707656	FBgn0039977	CG17454-RA
3L	23708625	23708744	FBgn0039977	CG17454-RA
3L	24526886	24527043	FBgn0040045	CG12460-RA
3L	24529440	24529681	FBgn0044510	mRpS5-RC
3L	24530450	24530764	FBgn0044510	mRpS5-RD
3R	58095	59007	FBgn0015331	abs-RA
3R	143609	145069	FBgn0261086	Syt14-RA
3R	145176	145296	FBgn0037234;FBgn0037234;FBgn0037234;FBgn0037234	CG9795-RB;CG9795-RA;CG9795-RC;CG9795-RD
3R	163106	163309	FBgn0037236;FBgn0037236	CG9772-RA;CG9772-RC
3R	224114	225534	FBgn0086605	CG9853-RA
3R	226217	227483	FBgn0086605	CG9853-RB
3R	262119	262565	FBgn0037251	CG9804-RA
3R	263118	263358	FBgn0037252	CG14650-RA
3R	304448	304651	FBgn0051523	CG31523-RB
3R	304874	305211	FBgn0051523	CG31523-RB
3R	467805	468377	FBgn0037262;FBgn0037262;FBgn0037263	MED31-RA;MED31-RB;CG18271-RB
3R	471142	474424	FBgn0022981	rpk-RA
3R	600544	600931	FBgn0010750	atms-RA
3R	709063	709934	FBgn0020280	laf-RA
3R	795332	795485	FBgn0037290	CG1124-RA
3R	867886	868079	FBgn0037292	CG2022-RB
3R	868637	869071	FBgn0037292	CG2022-RB
3R	912472	913632	FBgn0010313	corto-RA
3R	915631	916133	FBgn0010313	corto-RA
3R	916251	916919	FBgn0010313	corto-RA
3R	917430	918105	FBgn0010313	corto-RA
3R	976213	976365	FBgn0037295	dpr16-RA
3R	1043628	1043895	FBgn0259212;FBgn0259212;FBgn0259212	cno-RC;cno-RD;cno-RE
3R	1044019	1045168	FBgn0037296	Prosbeta2R2-RA
3R	1049208	1050071	FBgn0037298;FBgn0037298	CG2604-RA;CG2604-RC
3R	1050262	1051058	FBgn0037299	CG1115-RA
3R	1077754	1077953	FBgn0260462;FBgn0260462	CG12163-RB;CG12163-RA
3R	1079019	1079207	FBgn0037304	CG1113-RA
3R	1079755	1080664	FBgn0037304	CG1113-RA
3R	1082349	1082981	FBgn0086689	Hph-RC
3R	1090245	1090751	FBgn0086689	Hph-RA
3R	1107158	1107434	FBgn0013576;FBgn0013576	l(3)82Fd-RH;l(3)82Fd-RQ
3R	1157392	1157695	FBgn0013576	l(3)82Fd-RD
3R	1200547	1201067	FBgn0037317;FBgn0037317	CG14667-RA;CG14667-RB
3R	1300453	1300892	FBgn0037332	Hcs-RA
3R	1341797	1342071	FBgn0010051	Itp-r83A-RA
3R	1342474	1342866	FBgn0010051	Itp-r83A-RA
3R	1375888	1376853	FBgn0014342;FBgn0014342	mia-RA;mia-RB
3R	1389992	1391482	FBgn0037341;FBgn0037341	CG12746-RB;CG12746-RD
3R	1391860	1392339	FBgn0037342	CG2931-RA
3R	1394622	1395402	FBgn0041191	Rheb-RB
3R	1414275	1414422	FBgn0037345	rev7-RA
3R	1414703	1415147	FBgn0037345	rev7-RA
3R	1427692	1427852	FBgn0037347	CG1427-RC
3R	1437355	1437725	FBgn0017550;FBgn0017550	Rga-RA;Rga-RB
3R	1449087	1449557	FBgn0044823	Spec2-RA
3R	1454431	1456711	FBgn0051551	CG31551-RA
3R	1457745	1458645	FBgn0051549	CG31549-RA
3R	1459146	1459844	FBgn0037354	CG12171-RA
3R	1473960	1474075	FBgn0027951;FBgn0027951	MTA1-like-RA;MTA1-like-RB
3R	1474191	1474307	FBgn0027951;FBgn0027951	MTA1-like-RA;MTA1-like-RB
3R	1480626	1481062	FBgn0037359	MED27-RA
3R	1485660	1486337	FBgn0046222;FBgn0046222	CG1109-RA;CG1109-RB
3R	1494894	1495326	FBgn0037363;FBgn0037363	CG1347-RA;CG1347-RB
3R	1511097	1511725	FBgn0037364	Rab23-RA
3R	1560728	1560959	FBgn0037369;FBgn0037369	CG2100-RA;CG2100-RB
3R	1562795	1562995	FBgn0037370	CG1236-RA
3R	1567168	1567629	FBgn0037371	Sym-RA
3R	1567738	1567858	FBgn0037371	Sym-RA
3R	1567974	1568181	FBgn0027497	Madm-RA
3R	1584510	1585100	FBgn0086685	sec8-RA
3R	1608878	1610206	FBgn0037375;FBgn0037375;FBgn0037375;FBgn0037375	kat-60L1-RB;kat-60L1-RC;kat-60L1-RE;kat-60L1-RG
3R	1617644	1618934	FBgn0037377	CG1218-RA
3R	1650445	1650685	FBgn0037384;FBgn0037384	CG10981-RA;CG10981-RB
3R	1687753	1688285	FBgn0037391	CG2017-RD
3R	1833301	1833793	FBgn0003261;FBgn0003261;FBgn0003261	Rm62-RB;Rm62-RA;Rm62-RE
3R	2080253	2080369	FBgn0037415	Osi8-RA
3R	2172058	2172455	FBgn0037435	CG18048-RA
3R	2174175	2174339	FBgn0037436	Hr83-RA
3R	2174811	2176514	FBgn0037436	Hr83-RA
3R	2193981	2194337	FBgn0037439	CG10286-RA
3R	2200195	2200390	FBgn0260766	CG42564-RA
3R	2282775	2283082	FBgn0037446	CG10267-RA
3R	2472125	2472523	FBgn0010355;FBgn0010355;FBgn0010355;FBgn0010355	Taf1-RA;Taf1-RB;Taf1-RC;Taf1-RD
3R	2483173	2483576	FBgn0026566	CG1307-RB
3R	2567681	2567912	FBgn0051481;FBgn0051481;FBgn0051481;FBgn0051481	pb-RA;pb-RB;pb-RC;pb-RD
3R	2617355	2617619	FBgn0000439	Dfd-RA
3R	2637793	2637987	FBgn0000439	Dfd-RA
3R	2638099	2638768	FBgn0000439	Dfd-RA
3R	2675414	2676191	FBgn0003339;FBgn0003339	Scr-RB;Scr-RC
3R	2738045	2738397	FBgn0260642;FBgn0260642;FBgn0260642;FBgn0260642;FBgn0260642;FBgn0260642	Antp-RH;Antp-RD;Antp-RL;Antp-RF;Antp-RJ;Antp-RK
3R	2739540	2740866	FBgn0260642;FBgn0260642;FBgn0260642;FBgn0260642;FBgn0260642;FBgn0260642	Antp-RH;Antp-RD;Antp-RL;Antp-RF;Antp-RJ;Antp-RK
3R	2749399	2749550	FBgn0260642;FBgn0260642;FBgn0260642;FBgn0260642;FBgn0260642;FBgn0260642	Antp-RH;Antp-RD;Antp-RL;Antp-RF;Antp-RJ;Antp-RK
3R	2765948	2766140	FBgn0260642;FBgn0260642;FBgn0260642;FBgn0260642;FBgn0260642;FBgn0260642	Antp-RH;Antp-RD;Antp-RL;Antp-RF;Antp-RJ;Antp-RK
3R	2796129	2796411	FBgn0260642;FBgn0260642;FBgn0260642;FBgn0260642;FBgn0260642	Antp-RM;Antp-RG;Antp-RE;Antp-RN;Antp-RI
3R	2825624	2827077	FBgn0260642;FBgn0260642;FBgn0260642;FBgn0260642;FBgn0260642	Antp-RM;Antp-RG;Antp-RE;Antp-RN;Antp-RI
3R	2862826	2863838	FBgn0024289	Sodh-1-RA
3R	2900976	2901376	FBgn0037468	CG1943-RA
3R	2915435	2915628	FBgn0003884	alphaTub84B-RA
3R	2933874	2934900	FBgn0261238;FBgn0261238;FBgn0261238;FBgn0261238;FBgn0261238;FBgn0261238	Alh-RB;Alh-RC;Alh-RE;Alh-RF;Alh-RH;Alh-RI
3R	2935051	2935167	FBgn0261238;FBgn0261238;FBgn0261238;FBgn0261238;FBgn0261238;FBgn0261238	Alh-RB;Alh-RC;Alh-RE;Alh-RF;Alh-RH;Alh-RI
3R	2935290	2935562	FBgn0261238	Alh-RG
3R	2935676	2935981	FBgn0261238	Alh-RG
3R	2954063	2954944	FBgn0051248	CG31248-RA
3R	2981402	2981720	FBgn0037481	MAGE-RA
3R	3013058	3013258	FBgn0086372;FBgn0086372	lap-RC;lap-RD
3R	3073262	3074294	FBgn0037490	CG10053-RA
3R	3075868	3076217	FBgn0037492	CG10050-RA
3R	3149174	3149620	FBgn0037498	CG10029-RA
3R	3264792	3264990	FBgn0037503	CG14598-RA
3R	3745251	3745879	FBgn0037531;FBgn0037531	CG10445-RB;CG10445-RC
3R	3745986	3746180	FBgn0002542	lds-RA
3R	3788928	3789045	FBgn0000504	dsx-RC
3R	3794773	3795324	FBgn0000504;FBgn0000504	dsx-RA;dsx-RB
3R	3803376	3803651	FBgn0037533	CD98hc-RA
3R	3803853	3804559	FBgn0010401;FBgn0010401	Os-C-RB;Os-C-RC
3R	3825430	3825592	FBgn0037535	CG14463-RA
3R	3826070	3826969	FBgn0260723;FBgn0260723	CG42550-RA;CG42550-RB
3R	3833973	3835286	FBgn0040524	CG11052-RA
3R	3839252	3839377	FBgn0037540	Pbp95-RA
3R	3931427	3931588	FBgn0243512	puc-RA
3R	3931712	3932309	FBgn0243512	puc-RA
3R	3968650	3968999	FBgn0037551	Gie-RA
3R	3979367	3979662	FBgn0037551	Gie-RA
3R	3980324	3980834	FBgn0001138;FBgn0001138	grn-RA;grn-RB
3R	3985618	3985768	FBgn0001138;FBgn0001138	grn-RA;grn-RB
3R	3986531	3986647	FBgn0001138;FBgn0001138	grn-RA;grn-RB
3R	3990286	3990630	FBgn0001138;FBgn0001138	grn-RA;grn-RB
3R	3999011	3999491	FBgn0001138;FBgn0001138	grn-RA;grn-RB
3R	4007261	4007790	FBgn0001138;FBgn0001138	grn-RA;grn-RB
3R	4089977	4090603	FBgn0010173	RpA-70-RA
3R	4095392	4095900	FBgn0037561	CG9630-RA
3R	4128744	4129132	FBgn0037567	Gfr-RA
3R	4129444	4129757	FBgn0037567	Gfr-RA
3R	4130304	4130546	FBgn0260939	Sgt1-RA
3R	4131087	4131638	FBgn0260939	Sgt1-RA
3R	4168695	4170029	FBgn0037579	CG18193-RA
3R	4173726	4174593	FBgn0037581	CG7352-RA
3R	4175331	4175883	FBgn0261108	Atg13-RA
3R	4188746	4188973	FBgn0037584	CG7963-RB
3R	4189090	4189552	FBgn0037584	CG7963-RB
3R	4294913	4295026	FBgn0250829	PQBP-1-RB
3R	4476030	4476339	FBgn0024326;FBgn0024326	Mkk4-RA;Mkk4-RB
3R	4476453	4477072	FBgn0037602	CG8021-RA
3R	4502734	4503096	FBgn0037610	CG8043-RA
3R	4549200	4549548	FBgn0037617	CG8145-RA
3R	4557953	4558193	FBgn0037622	CG8202-RA
3R	4626393	4627364	FBgn0037632	Tcp-1eta-RA
3R	4631318	4632657	FBgn0037634	CG8359-RA
3R	4637412	4637602	FBgn0037635	CG9837-RC
3R	4646777	4647013	FBgn0040532	CG8369-RA
3R	4647434	4648115	FBgn0040532	CG8369-RA
3R	4680803	4681218	FBgn0003177	pyd-RI
3R	4682992	4683459	FBgn0003177	pyd-RI
3R	4686844	4687240	FBgn0037640	CG9731-RA
3R	4689574	4689846	FBgn0003177	pyd-RH
3R	4701563	4702142	FBgn0003177	pyd-RH
3R	4752058	4752558	FBgn0003177	pyd-RJ
3R	4752995	4754101	FBgn0003177	pyd-RJ
3R	4770722	4770913	FBgn0037644	CG11964-RA
3R	4805930	4806131	FBgn0037646	CG11967-RA
3R	4810160	4810321	FBgn0037647	RagA-RA
3R	4818704	4819054	FBgn0037648	CG11975-RA
3R	4828798	4829757	FBgn0037652	CG11980-RB
3R	4830021	4830381	FBgn0037652	CG11980-RA
3R	4833965	4834966	FBgn0037654	CG11983-RA
3R	4840968	4841531	FBgn0037656	CG11986-RA
3R	4864975	4865595	FBgn0037657	hyx-RA
3R	4875997	4876973	FBgn0028708	Mst85C-RA
3R	4881579	4882045	FBgn0037659	CG11033-RB
3R	5040181	5040363	FBgn0003165	pum-RB
3R	5040531	5040660	FBgn0003165	pum-RB
3R	5052347	5053278	FBgn0003165	pum-RB
3R	5054651	5055531	FBgn0003165	pum-RB
3R	5061474	5063028	FBgn0003165	pum-RC
3R	5080961	5081200	FBgn0037667;FBgn0037667	CG16734-RB;CG16734-RD
3R	5083308	5083937	FBgn0037669	CG9740-RA
3R	5084251	5084721	FBgn0037670	CG8436-RA
3R	5084842	5085035	FBgn0037670	CG8436-RA
3R	5161203	5161312	FBgn0037680	CG8121-RB
3R	5166916	5167458	FBgn0053936;FBgn0053936	CG33936-RB;CG33936-RA
3R	5173734	5174092	FBgn0053936;FBgn0053936	CG33936-RB;CG33936-RA
3R	5178515	5178633	FBgn0053937;FBgn0053937	CG33937-RA;CG33937-RB
3R	5179244	5179521	FBgn0053937;FBgn0053937	CG33937-RA;CG33937-RB
3R	5203800	5204619	FBgn0000723	Fps85D-RC
3R	5205138	5205331	FBgn0000723	Fps85D-RC
3R	5224786	5225144	FBgn0083953	CG34117-RA
3R	5227612	5227840	FBgn0037687	CG8132-RA
3R	5228642	5228923	FBgn0037688	CG9356-RB
3R	5229040	5229660	FBgn0037688	CG9356-RA
3R	5244114	5244590	FBgn0026188	ps-RF
3R	5328767	5330441	FBgn0037700	CG8149-RA
3R	5384859	5385060	FBgn0027950;FBgn0027950	MBD-like-RB;MBD-like-RA
3R	5385166	5385527	FBgn0027950;FBgn0027950	MBD-like-RB;MBD-like-RA
3R	5388925	5389156	FBgn0037710	CG9393-RA
3R	5389720	5390156	FBgn0261049	Vps45-RA
3R	5392555	5394561	FBgn0037712	CG16789-RA
3R	5397761	5397875	FBgn0037714	CG9396-RA
3R	5399726	5400070	FBgn0037715	CG9399-RC
3R	5408972	5409442	FBgn0053654	CG33654-RA
3R	5410055	5412046	FBgn0037718	P58IPK-RA
3R	5442702	5442819	FBgn0037720	CG8312-RB
3R	5453299	5454063	FBgn0037722	CG8319-RA
3R	5456241	5456920	FBgn0005585	Crc-RA
3R	5505782	5505977	FBgn0028997	nmdyn-D7-RA
3R	5506451	5506684	FBgn0028997	nmdyn-D7-RA
3R	5507114	5507353	FBgn0028997	nmdyn-D7-RA
3R	5507866	5508020	FBgn0037730	CG9444-RA
3R	5511733	5512042	FBgn0037731	CG18542-RA
3R	5519016	5519362	FBgn0052939	CG32939-RA
3R	5530056	5530772	FBgn0051352	CG31352-RA
3R	5552776	5553090	FBgn0052937	CG32937-RA
3R	5571120	5571516	FBgn0085438	CG34409-RA
3R	5573412	5573657	FBgn0005777	PpD3-RA
3R	5579486	5580218	FBgn0037741	CG16908-RA
3R	5580482	5581861	FBgn0037742	Rpt3R-RC
3R	5582491	5582915	FBgn0037743	CG8412-RA
3R	5588662	5589134	FBgn0037746;FBgn0037746;FBgn0037746	CG8478-RB;CG8478-RC;CG8478-RD
3R	5598312	5598938	FBgn0037750	CG12946-RA
3R	5600914	5601195	FBgn0037751	topi-RA
3R	5601779	5602479	FBgn0037751	topi-RA
3R	5611341	5611958	FBgn0037754	CG8500-RA
3R	5626488	5627534	FBgn0037759	CG8526-RA
3R	5705755	5706256	FBgn0250818;FBgn0250818;FBgn0250818	CG34360-RA;CG34360-RC;CG34360-RD
3R	5723271	5723777	FBgn0250818;FBgn0250818;FBgn0250818	CG34360-RA;CG34360-RC;CG34360-RD
3R	5724888	5725479	FBgn0250818;FBgn0250818;FBgn0250818	CG34360-RA;CG34360-RC;CG34360-RD
3R	5738945	5739379	FBgn0250818;FBgn0250818	CG34360-RB;CG34360-RE
3R	5868299	5868426	FBgn0053208;FBgn0053208;FBgn0053208;FBgn0053208;FBgn0053208	Mical-RA;Mical-RB;Mical-RE;Mical-RF;Mical-RI
3R	5874153	5874826	FBgn0037779	CG12811-RA
3R	5877990	5878967	FBgn0037781	Fancl-RA
3R	5913497	5913683	FBgn0037786	CG5361-RA
3R	5936055	5936177	FBgn0028734;FBgn0028734;FBgn0028734	Fmr1-RB;Fmr1-RA;Fmr1-RC
3R	5946785	5947125	FBgn0051477	CG31477-RA
3R	6089440	6090079	FBgn0037804;FBgn0037804	CG11870-RD;CG11870-RB
3R	6176256	6176381	FBgn0015396	jumu-RA
3R	6209032	6209189	FBgn0259938	cwo-RA
3R	6209960	6210201	FBgn0259938	cwo-RA
3R	6212643	6212875	FBgn0259938	cwo-RA
3R	6213570	6214598	FBgn0259938	cwo-RA
3R	6240471	6241071	FBgn0037816	CG6345-RA
3R	6354333	6354532	FBgn0001235	hth-RG
3R	6354842	6355488	FBgn0001235	hth-RG
3R	6415139	6415458	FBgn0001235;FBgn0001235	hth-RD;hth-RH
3R	6439644	6441176	FBgn0001235;FBgn0001235;FBgn0001235;FBgn0001235	hth-RA;hth-RB;hth-RC;hth-RF
3R	6441292	6441525	FBgn0001235;FBgn0001235;FBgn0001235;FBgn0001235	hth-RA;hth-RB;hth-RC;hth-RF
3R	6442391	6442832	FBgn0001235;FBgn0001235;FBgn0001235;FBgn0001235	hth-RA;hth-RB;hth-RC;hth-RF
3R	6469532	6469934	FBgn0001235	hth-RE
3R	6499741	6500136	FBgn0037818	CG6465-RA
3R	6586717	6587035	FBgn0037831;FBgn0037831	Cap-H2-RE;Cap-H2-RF
3R	6609228	6610179	FBgn0261380	mRpL37-RB
3R	6653110	6653348	FBgn0261053	Cad86C-RC
3R	6678591	6679850	FBgn0037842	CG6567-RB
3R	6710451	6710693	FBgn0037853	CG14696-RA
3R	6710859	6711223	FBgn0037856	CG4674-RA
3R	6712868	6713215	FBgn0042094	Adk3-RA
3R	6713405	6713870	FBgn0042094	Adk3-RA
3R	7023121	7023428	FBgn0037870	CG18577-RA
3R	7061272	7063047	FBgn0051441	CG31441-RA
3R	7066125	7067106	FBgn0037888	scpr-B-RA
3R	7238603	7239191	FBgn0037894	Ranbp9-RA
3R	7242550	7242665	FBgn0037895	CG6723-RA
3R	7245893	7247184	FBgn0037896	ninaG-RA
3R	7261990	7262980	FBgn0037902	CG5281-RA
3R	7383212	7383568	FBgn0037911	CG10898-RA
3R	7387539	7387860	FBgn0037912	CG6782-RC
3R	7392812	7393241	FBgn0037912;FBgn0037913;FBgn0037913;FBgn0037913	CG6782-RD;CG6783-RA;CG6783-RB;CG6783-RC
3R	7405966	7406892	FBgn0037917	wkd-RA
3R	7407170	7407445	FBgn0037917	wkd-RA
3R	7449261	7449815	FBgn0037922	CG14711-RA
3R	7451089	7452626	FBgn0037923;FBgn0037923	CG6813-RB;CG6813-RC
3R	7452773	7453056	FBgn0042205	CG18764-RA
3R	7500143	7500516	FBgn0037930	CG14715-RA
3R	7503379	7504083	FBgn0037931	CG18476-RA
3R	7567965	7568365	FBgn0037943	CG14722-RA
3R	7574639	7575200	FBgn0037944	CG6923-RA
3R	7585921	7586117	FBgn0017581	Lk6-RB
3R	7604522	7605120	FBgn0086910	l(3)neo38-RB
3R	7612823	7613982	FBgn0037950	HisCl1-RC
3R	7622738	7622898	FBgn0025802;FBgn0025802	Sbf-RA;Sbf-RB
3R	7644718	7645424	FBgn0019624	CoVa-RA
3R	7685197	7685788	FBgn0037956;FBgn0037956	CG6959-RA;CG6959-RC
3R	7694554	7694746	FBgn0037956;FBgn0037956	CG6959-RA;CG6959-RC
3R	7694865	7695061	FBgn0037956;FBgn0037956	CG6959-RA;CG6959-RC
3R	7788373	7789046	FBgn0000147	aur-RA
3R	8139375	8140182	FBgn0038011	CG4066-RA
3R	8195313	8195586	FBgn0001149	GstD1-RA
3R	8230781	8230943	FBgn0038037	Cyp9f2-RA
3R	8232605	8233423	FBgn0038038	CG5167-RA
3R	8234063	8234819	FBgn0038039	CG5196-RB
3R	8247743	8248157	FBgn0038043	CG17202-RA
3R	8253882	8254617	FBgn0038046	CG5641-RA
3R	8255208	8256673	FBgn0038047	CG5245-RA
3R	8263153	8264722	FBgn0038051	CG17207-RA
3R	8463909	8464069	FBgn0038069	CG11608-RA
3R	8505830	8506023	FBgn0038076	Cyp313a4-RA
3R	8506183	8506769	FBgn0038076	Cyp313a4-RA
3R	8539226	8539530	FBgn0002905	mus308-RA
3R	8807041	8807154	FBgn0038100	Paip2-RA
3R	8819374	8820244	FBgn0038105	yellow-f2-RA
3R	8836720	8837256	FBgn0038110	CG8031-RA
3R	8837455	8837656	FBgn0020496	CtBP-RC
3R	8842128	8842603	FBgn0020496	CtBP-RB
[truncated: 1,010 more rows]
