# Supplementary material for: Genome-Wide Tissue-Specific Occupancy of the Hox Protein Ultrabithorax and Hox Cofactor Homothorax in Drosophila
Source: PLoS One. 2011 Apr 5;6(4):e14686. doi: 10.1371/journal.pone.0014686 (PMC3071676; doi:10.1371/journal.pone.0014686)
Supplement: Table S5 — Called Ubx and Hth target genes (this study). All genes called as Ubx or Hth targets in either the haltere or the leg. Whether Ubx or Hth targets a gene in a given tissue is indicated with a “yes” or “no” in each column. (0.52 MB XLS) [file pone.0014686.s010.xls]

## Sheet: All_called_target_genes
FBID	Gene	Ubx target, Haltere	Hth target, Haltere	Ubx target, Leg	Hth target, Leg
FBgn0000015	Abd-B	No	No	No	Yes
FBgn0000018	abo	Yes	No	No	No
FBgn0000022	ac	Yes	No	No	No
FBgn0000042	Act5C	Yes	Yes	Yes	Yes
FBgn0000054	Adf1	Yes	Yes	No	Yes
FBgn0000055	Adh	Yes	No	Yes	Yes
FBgn0000056	Adhr	Yes	No	Yes	Yes
FBgn0000061	al	No	No	Yes	No
FBgn0000063	ald	Yes	No	No	No
FBgn0000083	AnnIX	Yes	No	Yes	No
FBgn0000097	aop	Yes	Yes	No	Yes
FBgn0000099	ap	Yes	No	No	No
FBgn0000115	Arf72A	No	No	No	Yes
FBgn0000117	arm	Yes	No	No	No
FBgn0000119	arr	Yes	No	No	No
FBgn0000139	ash2	Yes	No	No	No
FBgn0000146	aub	Yes	No	No	No
FBgn0000147	aur	Yes	No	Yes	Yes
FBgn0000157	Dll	Yes	Yes	Yes	Yes
FBgn0000158	bam	Yes	No	No	No
FBgn0000173	ben	Yes	Yes	No	Yes
FBgn0000179	bi	Yes	No	No	No
FBgn0000210	br	Yes	No	Yes	No
FBgn0000212	brm	No	Yes	No	Yes
FBgn0000216	Brd	Yes	No	No	No
FBgn0000233	btd	No	No	No	Yes
FBgn0000242	Bx	Yes	No	Yes	Yes
FBgn0000244	by	No	Yes	No	Yes
FBgn0000246	c(3)G	Yes	No	Yes	No
FBgn0000250	cact	Yes	No	No	No
FBgn0000256	capu	No	No	No	Yes
FBgn0000258	CkIIalpha	Yes	No	No	No
FBgn0000259	CkIIbeta	Yes	No	No	No
FBgn0000261	Cat	Yes	No	No	Yes
FBgn0000283	Cp190	Yes	Yes	Yes	Yes
FBgn0000289	cg	Yes	No	No	No
FBgn0000307	chif	Yes	No	No	Yes
FBgn0000308	chic	Yes	No	No	No
FBgn0000316	cin	Yes	No	No	No
FBgn0000318	cl	No	Yes	No	Yes
FBgn0000319	Chc	Yes	No	No	No
FBgn0000326	clt	Yes	No	No	No
FBgn0000339	cni	Yes	No	No	No
FBgn0000346	comt	Yes	No	No	No
FBgn0000370	crc	Yes	No	No	No
FBgn0000376	crm	Yes	No	No	No
FBgn0000377	crn	No	No	Yes	No
FBgn0000384	cta	Yes	No	No	No
FBgn0000392	cup	Yes	No	No	No
FBgn0000394	cv	Yes	No	No	Yes
FBgn0000404	CycA	Yes	No	Yes	No
FBgn0000405	CycB	Yes	No	No	No
FBgn0000409	Cyt-c-p	Yes	No	Yes	No
FBgn0000414	Dab	Yes	No	No	No
FBgn0000416	Sap-r	Yes	No	No	No
FBgn0000426	SmF	Yes	No	No	No
FBgn0000439	Dfd	Yes	No	Yes	No
FBgn0000463	Dl	Yes	No	No	No
FBgn0000482	dor	Yes	No	No	No
FBgn0000492	Dr	Yes	No	No	No
FBgn0000497	ds	Yes	Yes	No	Yes
FBgn0000504	dsx	Yes	Yes	Yes	Yes
FBgn0000533	ea	Yes	No	No	No
FBgn0000536	eas	No	Yes	No	Yes
FBgn0000542	ec	Yes	No	No	No
FBgn0000546	EcR	Yes	Yes	No	Yes
FBgn0000547	ed	Yes	No	No	No
FBgn0000557	Ef1alpha100E	Yes	No	No	No
FBgn0000560	eg	Yes	No	No	No
FBgn0000562	egl	Yes	No	No	No
FBgn0000567	Eip74EF	No	Yes	No	Yes
FBgn0000568	Eip75B	Yes	Yes	No	Yes
FBgn0000575	emc	Yes	Yes	Yes	Yes
FBgn0000577	en	Yes	No	No	No
FBgn0000579	Eno	Yes	No	No	Yes
FBgn0000581	E(Pc)	Yes	No	Yes	No
FBgn0000615	exu	Yes	No	No	No
FBgn0000625	eyg	Yes	No	No	No
FBgn0000629	E(z)	No	Yes	No	Yes
FBgn0000630	f	Yes	No	No	No
FBgn0000635	Fas2	Yes	No	No	No
FBgn0000636	Fas3	Yes	Yes	No	Yes
FBgn0000658	fj	Yes	No	No	No
FBgn0000667	Actn	Yes	Yes	No	Yes
FBgn0000709	fliI	Yes	No	No	No
FBgn0000721	for	Yes	Yes	No	Yes
FBgn0000723	Fps85D	Yes	Yes	Yes	No
FBgn0000927	fs(1)Ya	Yes	No	No	No
FBgn0000928	fs(1)Yb	Yes	No	Yes	No
FBgn0001077	ftz	No	No	Yes	No
FBgn0001078	ftz-f1	Yes	No	No	Yes
FBgn0001079	fu	No	No	No	Yes
FBgn0001084	fy	Yes	No	No	No
FBgn0001085	fz	Yes	No	Yes	No
FBgn0001091	Gapdh1	Yes	No	No	No
FBgn0001092	Gapdh2	Yes	No	No	Yes
FBgn0001123	G-salpha60A	Yes	No	No	No
FBgn0001138	grn	Yes	No	No	No
FBgn0001139	gro	Yes	No	No	No
FBgn0001147	gsb-n	Yes	No	No	No
FBgn0001149	GstD1	Yes	Yes	No	Yes
FBgn0001168	h	Yes	Yes	No	Yes
FBgn0001169	H	Yes	No	No	No
FBgn0001185	her	Yes	No	No	No
FBgn0001186	Hex-A	Yes	Yes	No	Yes
FBgn0001187	Hex-C	Yes	No	No	No
FBgn0001189	hfw	Yes	No	No	No
FBgn0001205	Hmgcr	Yes	No	No	No
FBgn0001206	Hmr	Yes	No	No	No
FBgn0001219	Hsc70-4	Yes	No	No	No
FBgn0001230	Hsp68	Yes	No	No	No
FBgn0001233	Hsp83	Yes	No	No	No
FBgn0001235	hth	Yes	Yes	No	No
FBgn0001247	Ide	Yes	No	No	No
FBgn0001253	ImpE1	Yes	No	No	No
FBgn0001258	ImpL3	No	No	No	Yes
FBgn0001269	inv	Yes	No	No	No
FBgn0001276	ix	Yes	No	No	Yes
FBgn0001281	janB	Yes	No	No	No
FBgn0001297	kay	Yes	No	No	Yes
FBgn0001308	Khc	Yes	No	No	No
FBgn0001316	klar	Yes	No	No	No
FBgn0001320	kni	Yes	No	No	No
FBgn0001323	knrl	Yes	No	No	Yes
FBgn0001324	kto	Yes	No	No	No
FBgn0001332	L	Yes	No	No	No
FBgn0001337	Exp6	Yes	No	No	No
FBgn0001941	ifc	Yes	No	No	No
FBgn0001961	Sop2	Yes	No	No	No
FBgn0001970	Pgant35A	No	No	No	Yes
FBgn0001978	stc	Yes	No	No	No
FBgn0001981	esg	Yes	No	No	No
FBgn0001987	Gli	No	Yes	No	No
FBgn0001994	crp	Yes	No	No	No
FBgn0001995	mRpL4	Yes	No	No	No
FBgn0002021	l(2)37Bb	Yes	No	No	No
FBgn0002069	Aats-asp	Yes	Yes	No	Yes
FBgn0002121	l(2)gl	Yes	No	No	No
FBgn0002183	dre4	Yes	No	No	No
FBgn0002283	l(3)73Ah	Yes	No	No	Yes
FBgn0002284	Pros26	Yes	No	Yes	No
FBgn0002413	dco	Yes	No	No	No
FBgn0002441	l(3)mbt	Yes	No	Yes	No
FBgn0002521	pho	Yes	No	Yes	Yes
FBgn0002526	LanA	Yes	No	No	No
FBgn0002542	lds	Yes	No	No	No
FBgn0002543	lea	Yes	Yes	Yes	Yes
FBgn0002565	Lsp2	Yes	No	No	No
FBgn0002566	lt	Yes	No	Yes	No
FBgn0002567	ltd	Yes	No	No	No
FBgn0002592	m2	No	No	No	Yes
FBgn0002609	HLHm3	No	No	No	Yes
FBgn0002633	HLHm7	No	No	No	Yes
FBgn0002641	mal	Yes	No	No	Yes
FBgn0002643	mam	Yes	No	No	No
FBgn0002673	twe	Yes	No	No	No
FBgn0002707	mei-9	Yes	No	No	No
FBgn0002709	mei-218	Yes	No	No	No
FBgn0002716	mei-W68	Yes	No	Yes	No
FBgn0002732	malpha	Yes	No	Yes	Yes
FBgn0002733	HLHmbeta	Yes	No	Yes	No
FBgn0002734	HLHmdelta	No	No	No	Yes
FBgn0002778	mnd	Yes	No	No	No
FBgn0002780	mod	Yes	No	No	Yes
FBgn0002791	mr	Yes	No	No	No
FBgn0002838	ms(3)K81	Yes	No	Yes	Yes
FBgn0002878	mus101	Yes	No	No	No
FBgn0002887	mus201	Yes	No	Yes	No
FBgn0002899	mus301	Yes	No	Yes	No
FBgn0002901	mus304	Yes	No	No	No
FBgn0002905	mus308	Yes	No	No	No
FBgn0002909	mus312	Yes	No	Yes	No
FBgn0002931	net	Yes	No	No	No
FBgn0002945	nkd	Yes	Yes	Yes	Yes
FBgn0002948	nod	Yes	No	Yes	No
FBgn0002962	nos	Yes	No	No	No
FBgn0002973	numb	Yes	Yes	No	Yes
FBgn0003013	osa	Yes	No	No	No
FBgn0003016	osp	Yes	No	No	No
FBgn0003022	Ote	Yes	No	No	No
FBgn0003028	ovo	Yes	No	No	Yes
FBgn0003031	pAbp	Yes	No	No	No
FBgn0003044	Pcl	Yes	No	No	No
FBgn0003071	Pfk	Yes	No	No	No
FBgn0003074	Pgi	Yes	No	No	Yes
FBgn0003076	Pgm	No	Yes	No	Yes
FBgn0003079	phl	Yes	No	No	No
FBgn0003087	pim	Yes	No	No	No
FBgn0003093	Pkc98E	Yes	No	Yes	No
FBgn0003114	plu	Yes	No	No	No
FBgn0003116	pn	Yes	No	Yes	No
FBgn0003118	pnt	No	Yes	No	Yes
FBgn0003129	Poxm	No	Yes	No	Yes
FBgn0003134	Pp1alpha-96A	Yes	No	No	No
FBgn0003137	Ppn	Yes	Yes	No	No
FBgn0003138	Ptp61F	Yes	No	No	No
FBgn0003162	Pu	Yes	No	No	No
FBgn0003165	pum	Yes	Yes	Yes	Yes
FBgn0003174	pwn	Yes	No	No	No
FBgn0003175	px	Yes	Yes	No	Yes
FBgn0003177	pyd	Yes	Yes	Yes	Yes
FBgn0003189	r	Yes	No	No	No
FBgn0003231	ref(2)P	Yes	No	No	No
FBgn0003250	Rh4	Yes	No	Yes	No
FBgn0003257	r-l	No	No	Yes	No
FBgn0003261	Rm62	Yes	No	Yes	No
FBgn0003278	RpI135	Yes	No	No	No
FBgn0003279	RpL4	No	No	No	Yes
FBgn0003292	rt	Yes	No	No	No
FBgn0003301	rut	Yes	No	No	No
FBgn0003302	rux	Yes	Yes	No	No
FBgn0003310	S	Yes	No	Yes	Yes
FBgn0003339	Scr	Yes	No	Yes	No
FBgn0003345	sd	Yes	No	No	No
FBgn0003353	sei	Yes	No	No	No
FBgn0003371	sgg	Yes	Yes	Yes	Yes
FBgn0003388	shd	No	No	No	Yes
FBgn0003390	shf	Yes	Yes	No	Yes
FBgn0003391	shg	Yes	No	No	No
FBgn0003392	shi	Yes	No	No	No
FBgn0003396	shn	Yes	Yes	Yes	Yes
FBgn0003410	sina	Yes	No	No	No
FBgn0003411	sisA	Yes	No	No	No
FBgn0003415	skd	Yes	No	No	No
FBgn0003435	sm	Yes	No	No	Yes
FBgn0003444	smo	Yes	No	No	No
FBgn0003447	sn	Yes	No	No	No
FBgn0003460	so	No	No	No	Yes
FBgn0003463	sog	Yes	No	No	No
FBgn0003464	sol	No	Yes	No	Yes
FBgn0003480	spn-B	Yes	No	No	No
FBgn0003483	spn-E	Yes	No	No	No
FBgn0003502	Btk29A	Yes	Yes	No	Yes
FBgn0003514	sqh	Yes	No	No	No
FBgn0003525	stg	Yes	No	Yes	Yes
FBgn0003527	stil	Yes	No	Yes	No
FBgn0003545	sub	Yes	No	No	No
FBgn0003567	su(Hw)	Yes	No	No	No
FBgn0003575	su(s)	Yes	No	No	No
FBgn0003654	sw	Yes	No	No	No
FBgn0003655	swa	Yes	No	No	No
FBgn0003714	tko	Yes	No	No	No
FBgn0003716	tkv	Yes	Yes	Yes	Yes
FBgn0003717	Tl	Yes	Yes	No	Yes
FBgn0003720	tll	Yes	No	No	No
FBgn0003721	Tm1	Yes	No	No	No
FBgn0003731	Egfr	No	No	No	Yes
FBgn0003732	Top2	Yes	No	No	No
FBgn0003733	tor	Yes	No	No	No
FBgn0003741	tra	Yes	No	No	No
FBgn0003747	Tre	Yes	No	No	No
FBgn0003748	Treh	Yes	Yes	No	No
FBgn0003862	trx	Yes	Yes	Yes	Yes
FBgn0003866	tsh	Yes	Yes	No	No
FBgn0003867	tsl	Yes	No	No	No
FBgn0003870	ttk	Yes	No	Yes	No
FBgn0003884	alphaTub84B	Yes	No	No	No
FBgn0003889	betaTub85D	Yes	No	No	No
FBgn0003891	tud	Yes	No	No	No
FBgn0003892	ptc	Yes	No	No	No
FBgn0003896	tup	Yes	No	No	No
FBgn0003943	Ubi-p63E	No	Yes	No	Yes
FBgn0003944	Ubx	Yes	No	Yes	Yes
FBgn0003950	unc	Yes	No	No	No
FBgn0003970	vas	Yes	No	No	No
FBgn0003975	vg	Yes	No	No	No
FBgn0003984	vn	Yes	No	No	No
FBgn0003997	W	Yes	Yes	Yes	Yes
FBgn0004009	wg	Yes	Yes	No	No
FBgn0004049	yrt	Yes	No	No	No
FBgn0004050	z	Yes	No	No	Yes
FBgn0004052	Z600	Yes	No	No	No
FBgn0004057	Zw	No	No	No	Yes
FBgn0004087	Dhfr	Yes	No	No	No
FBgn0004101	bs	Yes	No	No	No
FBgn0004107	cdc2c	Yes	No	No	No
FBgn0004110	tin	Yes	No	No	No
FBgn0004132	boca	Yes	No	No	No
FBgn0004133	blow	Yes	No	No	No
FBgn0004145	Vha16	Yes	No	No	No
FBgn0004177	mts	Yes	No	No	No
FBgn0004179	Csp	Yes	No	Yes	No
FBgn0004198	ct	Yes	No	No	No
FBgn0004227	nonA	Yes	No	No	No
FBgn0004237	Hrb87F	Yes	No	Yes	No
FBgn0004359	T48	Yes	No	Yes	No
FBgn0004364	18w	Yes	No	No	No
FBgn0004368	Ptp4E	Yes	No	No	Yes
FBgn0004370	Ptp10D	Yes	Yes	No	Yes
FBgn0004377	Klp54D	Yes	No	Yes	No
FBgn0004378	Klp61F	Yes	No	No	No
FBgn0004381	Klp68D	Yes	No	No	No
FBgn0004390	Gap1	Yes	No	Yes	Yes
FBgn0004396	CrebA	Yes	Yes	No	Yes
FBgn0004399	psq	Yes	Yes	Yes	Yes
FBgn0004400	rhi	Yes	Yes	No	No
FBgn0004401	Pep	Yes	No	Yes	No
FBgn0004404	RpS14b	Yes	No	No	No
FBgn0004419	me31B	Yes	No	Yes	Yes
FBgn0004432	Cyp1	Yes	No	Yes	No
FBgn0004449	Ten-m	Yes	No	No	Yes
FBgn0004456	mew	No	No	No	Yes
FBgn0004463	RpIII128	No	No	No	Yes
FBgn0004465	Su(P)	Yes	No	No	No
FBgn0004509	Fur1	Yes	No	Yes	Yes
FBgn0004511	dy	No	Yes	No	Yes
FBgn0004513	Mdr65	No	No	No	Yes
FBgn0004551	Ca-P60A	Yes	No	Yes	No
FBgn0004569	argos	Yes	Yes	No	Yes
FBgn0004579	salm	Yes	No	No	No
FBgn0004581	bgcn	Yes	No	No	No
FBgn0004583	ex	Yes	Yes	Yes	Yes
FBgn0004587	B52	Yes	No	No	Yes
FBgn0004597	CycC	Yes	No	No	No
FBgn0004598	Fur2	Yes	No	No	No
FBgn0004603	Src42A	Yes	No	Yes	No
FBgn0004607	zfh2	Yes	Yes	Yes	No
FBgn0004624	CaMKII	Yes	No	Yes	No
FBgn0004625	norpA	Yes	No	No	No
FBgn0004644	hh	No	Yes	No	No
FBgn0004646	ogre	Yes	Yes	No	Yes
FBgn0004647	N	Yes	No	No	No
FBgn0004648	svr	Yes	No	No	No
FBgn0004652	fru	Yes	Yes	Yes	Yes
FBgn0004655	wapl	Yes	No	Yes	No
FBgn0004656	fs(1)h	Yes	No	No	No
FBgn0004698	mus210	Yes	No	Yes	Yes
FBgn0004811	fs(2)ltoPP43	Yes	No	No	No
FBgn0004828	His3.3B	Yes	No	No	No
FBgn0004837	Su(H)	Yes	No	Yes	Yes
FBgn0004838	Hrb27C	Yes	No	No	No
FBgn0004839	otk	No	No	Yes	No
FBgn0004854	B-H2	Yes	No	No	No
FBgn0004855	RpII15	Yes	No	Yes	Yes
FBgn0004859	ci	Yes	Yes	No	Yes
FBgn0004860	ph-d	Yes	Yes	Yes	Yes
FBgn0004861	ph-p	Yes	Yes	Yes	Yes
FBgn0004865	Eip78C	Yes	Yes	No	Yes
FBgn0004868	Gdi	Yes	No	No	No
FBgn0004870	bab1	Yes	No	No	Yes
FBgn0004872	piwi	Yes	No	Yes	No
FBgn0004885	tok	Yes	No	No	No
FBgn0004888	Scsalpha	Yes	No	No	No
FBgn0004889	tws	No	No	Yes	No
FBgn0004892	sob	Yes	Yes	No	No
FBgn0004893	bowl	Yes	Yes	No	Yes
FBgn0004898	fd96Cb	Yes	No	Yes	No
FBgn0004907	14-3-3zeta	No	No	No	Yes
FBgn0004914	Hnf4	Yes	Yes	No	Yes
FBgn0004921	Ggamma1	Yes	No	No	No
FBgn0004924	Top1	Yes	No	No	No
FBgn0005278	Sam-S	Yes	No	No	No
FBgn0005427	ewg	Yes	No	No	No
FBgn0005511	mid	Yes	No	No	No
FBgn0005536	Mbs	Yes	No	No	No
FBgn0005558	ey	Yes	No	No	No
FBgn0005612	Sox14	Yes	Yes	No	Yes
FBgn0005613	Sox15	Yes	No	No	No
FBgn0005624	Psc	Yes	No	Yes	Yes
FBgn0005630	lola	Yes	No	Yes	No
FBgn0005634	zip	Yes	No	No	No
FBgn0005640	Eip63E	Yes	No	No	No
FBgn0005649	Rox8	Yes	No	Yes	No
FBgn0005654	lat	Yes	No	Yes	No
FBgn0005670	Cyp4d1	Yes	No	No	No
FBgn0005672	spi	Yes	Yes	Yes	Yes
FBgn0005674	Aats-glupro	No	No	No	Yes
FBgn0005683	pie	Yes	No	No	No
FBgn0005694	Aef1	Yes	No	No	Yes
FBgn0005695	gcl	Yes	No	No	No
FBgn0005696	DNApol-alpha73	Yes	No	Yes	No
FBgn0005771	noc	Yes	Yes	Yes	No
FBgn0005777	PpD3	Yes	No	Yes	No
FBgn0010051	Itp-r83A	Yes	No	No	No
FBgn0010053	Jheh1	Yes	No	No	No
FBgn0010097	gammaTub37C	Yes	No	No	No
FBgn0010100	Acon	Yes	Yes	No	Yes
FBgn0010105	comm	Yes	No	Yes	Yes
FBgn0010110	east	Yes	Yes	No	Yes
FBgn0010113	hdc	Yes	Yes	Yes	Yes
FBgn0010173	RpA-70	Yes	No	No	No
FBgn0010198	RpS15Aa	Yes	No	No	No
FBgn0010222	Nmdmc	Yes	No	No	No
FBgn0010228	HmgZ	No	No	No	Yes
FBgn0010240	Lcch3	Yes	No	No	No
FBgn0010241	Mdr50	Yes	No	No	No
FBgn0010246	Myo61F	Yes	No	No	Yes
FBgn0010278	Ssrp	Yes	No	No	No
FBgn0010280	Taf4	Yes	No	No	No
FBgn0010282	TfIIFalpha	Yes	No	No	No
FBgn0010287	Trf	Yes	No	No	No
FBgn0010300	brat	Yes	Yes	Yes	Yes
FBgn0010313	corto	Yes	Yes	Yes	No
FBgn0010315	CycD	Yes	No	No	No
FBgn0010316	dap	Yes	Yes	No	Yes
FBgn0010340	140up	Yes	No	No	No
FBgn0010341	Cdc42	No	No	Yes	No
FBgn0010348	Arf79F	Yes	No	No	No
FBgn0010349	Dhc64C	No	Yes	No	Yes
FBgn0010355	Taf1	Yes	No	Yes	No
FBgn0010379	Akt1	Yes	No	Yes	No
FBgn0010380	Bap	Yes	No	No	No
FBgn0010382	CycE	Yes	Yes	No	Yes
FBgn0010395	betaInt-nu	Yes	No	No	No
FBgn0010401	Os-C	Yes	No	No	No
FBgn0010406	RNaseX25	Yes	No	No	No
FBgn0010415	Sdc	No	Yes	No	Yes
FBgn0010426	Vha14	Yes	No	No	No
FBgn0010434	cora	Yes	No	No	No
FBgn0010470	Fkbp13	No	Yes	No	Yes
FBgn0010488	NAT1	Yes	No	No	No
FBgn0010497	l(2)01810	Yes	No	No	Yes
FBgn0010504	kermit	Yes	No	No	No
FBgn0010531	CCS	Yes	No	No	No
FBgn0010548	Aldh-III	Yes	No	Yes	No
FBgn0010575	sbb	Yes	Yes	Yes	Yes
FBgn0010583	dock	Yes	No	No	No
FBgn0010591	Sply	Yes	No	Yes	No
FBgn0010602	lwr	Yes	No	No	No
FBgn0010612	l(2)06225	Yes	No	No	No
FBgn0010620	Sip1	Yes	No	No	No
FBgn0010651	l(2)08717	Yes	No	No	Yes
FBgn0010709	Atg6	Yes	No	No	No
FBgn0010750	atms	Yes	No	No	No
FBgn0010762	simj	Yes	No	Yes	Yes
FBgn0010768	sqz	Yes	No	No	No
FBgn0010786	l(3)02640	Yes	No	No	No
FBgn0010825	Gug	No	Yes	No	Yes
FBgn0010851	sgl	No	No	Yes	No
FBgn0010877	l(3)05822	Yes	No	No	No
FBgn0010894	sinu	Yes	No	No	No
FBgn0010905	Spn	Yes	No	No	No
FBgn0011013	nero	Yes	No	No	No
FBgn0011202	dia	Yes	No	No	No
FBgn0011205	fbl	Yes	No	No	No
FBgn0011207	pelo	No	No	No	Yes
FBgn0011217	eff	Yes	No	Yes	No
FBgn0011219	Bsg	Yes	No	No	No
FBgn0011224	heph	Yes	Yes	No	Yes
FBgn0011230	poe	Yes	No	No	No
FBgn0011236	ken	Yes	No	No	No
FBgn0011241	cbx	Yes	No	No	No
FBgn0011259	Sema-1a	Yes	No	No	No
FBgn0011277	HLH4C	Yes	No	No	No
FBgn0011284	RpS4	Yes	No	No	No
FBgn0011285	S6kII	Yes	No	No	No
FBgn0011293	a10	Yes	No	No	No
FBgn0011300	babo	Yes	No	No	No
FBgn0011305	Rsf1	No	No	Yes	No
FBgn0011335	l(3)j2D3	Yes	No	Yes	No
FBgn0011476	l(3)neo43	Yes	No	Yes	No
FBgn0011509	SrpRbeta	Yes	No	No	No
FBgn0011571	caz	No	No	Yes	No
FBgn0011577	dally	Yes	No	Yes	No
FBgn0011581	Dms	Yes	No	No	No
FBgn0011591	fng	Yes	Yes	No	Yes
FBgn0011592	fra	Yes	No	No	No
FBgn0011604	Iswi	Yes	No	No	No
FBgn0011638	La	Yes	Yes	No	Yes
FBgn0011642	Zyx102EF	Yes	No	Yes	No
FBgn0011659	Mlh1	Yes	No	No	No
FBgn0011660	Pms2	Yes	No	No	No
FBgn0011661	Moe	Yes	Yes	No	Yes
FBgn0011666	msi	Yes	No	No	Yes
FBgn0011701	repo	Yes	No	No	No
FBgn0011703	RnrL	Yes	No	Yes	No
FBgn0011704	RnrS	Yes	Yes	Yes	Yes
FBgn0011706	rpr	Yes	No	No	Yes
FBgn0011708	Syx5	Yes	No	No	No
FBgn0011739	wts	Yes	No	No	Yes
FBgn0011742	Arp14D	Yes	No	No	No
FBgn0011747	Ank	Yes	No	Yes	No
FBgn0011760	ctp	Yes	No	No	Yes
FBgn0011762	DNApol-alpha50	No	No	Yes	No
FBgn0011764	Dsp1	Yes	Yes	Yes	No
FBgn0011766	E2f	Yes	Yes	Yes	Yes
FBgn0011768	Fdh	No	No	No	Yes
FBgn0011774	Irbp	Yes	No	Yes	No
FBgn0011785	BRWD3	Yes	No	No	No
FBgn0011817	nmo	Yes	No	No	No
FBgn0011823	Pen	No	No	No	Yes
FBgn0011837	Tis11	Yes	Yes	No	Yes
FBgn0012034	AcCoAS	Yes	No	No	Yes
FBgn0012066	DNApol-delta	Yes	No	No	No
FBgn0013263	Trl	Yes	No	No	Yes
FBgn0013272	Gp150	Yes	No	No	No
FBgn0013303	Nca	Yes	No	No	No
FBgn0013334	Sap47	Yes	No	No	No
FBgn0013469	klu	Yes	No	No	No
FBgn0013548	l(2)dtl	Yes	No	No	No
FBgn0013576	l(3)82Fd	Yes	Yes	No	No
FBgn0013591	Mi-2	Yes	No	No	No
FBgn0013718	nuf	Yes	No	No	No
FBgn0013720	pck	Yes	No	No	No
FBgn0013726	pnut	No	Yes	No	Yes
FBgn0013732	sced	Yes	No	No	Yes
FBgn0013733	shot	Yes	No	Yes	No
FBgn0013749	Arf102F	Yes	No	No	Yes
FBgn0013753	Bgb	Yes	No	No	No
FBgn0013755	Bro	Yes	No	No	No
FBgn0013756	Mtor	Yes	No	No	No
FBgn0013765	cnn	Yes	No	No	No
FBgn0013767	Crz	Yes	No	No	No
FBgn0013770	Cp1	Yes	No	No	No
FBgn0013773	Cyp6a22	Yes	No	Yes	No
FBgn0013799	Deaf1	No	No	No	Yes
FBgn0013811	Dhc62B	Yes	No	No	No
FBgn0013954	FK506-bp2	Yes	No	No	No
FBgn0013983	imd	No	No	No	Yes
FBgn0013984	InR	Yes	Yes	No	Yes
FBgn0014002	Pdi	No	Yes	No	No
FBgn0014011	Rac2	Yes	No	No	No
FBgn0014019	Rh5	Yes	No	Yes	Yes
FBgn0014020	Rho1	Yes	No	No	No
FBgn0014024	Rnp4F	Yes	No	No	Yes
FBgn0014026	RpL7A	Yes	No	No	No
FBgn0014031	Spat	Yes	No	No	No
FBgn0014032	Sptr	No	No	No	Yes
FBgn0014037	Su(Tpl)	Yes	No	No	Yes
FBgn0014092	CG4278	Yes	No	No	No
FBgn0014127	barr	No	No	No	Yes
FBgn0014133	bif	Yes	No	No	No
FBgn0014141	cher	No	Yes	No	Yes
FBgn0014143	croc	Yes	No	No	No
FBgn0014163	fax	No	No	No	Yes
FBgn0014269	prod	Yes	No	Yes	Yes
FBgn0014342	mia	Yes	No	Yes	No
FBgn0014343	mirr	Yes	No	No	No
FBgn0014362	mub	Yes	No	No	Yes
FBgn0014366	noi	Yes	No	No	No
FBgn0014388	sty	Yes	No	No	No
FBgn0014467	CrebB-17A	Yes	No	No	No
FBgn0014861	Mcm2	No	Yes	No	Yes
FBgn0014903	CG14630	Yes	No	No	No
FBgn0014930	CG2846	Yes	No	Yes	No
FBgn0014931	CG2678	Yes	No	No	No
FBgn0014949	btn	Yes	No	No	No
FBgn0015000	betaggt-I	Yes	No	No	No
FBgn0015008	Actn3	Yes	No	No	No
FBgn0015019	Cctgamma	Yes	No	No	No
FBgn0015024	CkIalpha	Yes	No	No	No
FBgn0015025	CkIIalpha-i1	Yes	No	Yes	No
FBgn0015075	Ddx1	Yes	No	No	No
FBgn0015221	Fer2LCH	Yes	Yes	Yes	Yes
FBgn0015239	Hr78	Yes	No	No	No
FBgn0015245	Hsp60	Yes	No	No	No
FBgn0015268	Nap1	Yes	No	No	No
FBgn0015269	Nf1	Yes	No	Yes	No
FBgn0015270	Orc2	Yes	No	No	No
FBgn0015277	Pi3K59F	Yes	No	No	No
FBgn0015279	Pi3K92E	No	Yes	No	Yes
FBgn0015283	Pros54	Yes	No	Yes	No
FBgn0015288	RpL22	Yes	No	No	No
FBgn0015296	Shc	No	Yes	No	Yes
FBgn0015298	Srp19	Yes	No	No	No
FBgn0015321	UbcD4	Yes	No	No	No
FBgn0015331	abs	Yes	No	No	Yes
FBgn0015351	CG14906	Yes	No	No	No
FBgn0015359	CG2034	No	No	No	Yes
FBgn0015371	chn	No	Yes	No	Yes
FBgn0015372	chrw	Yes	No	No	No
FBgn0015374	crl	Yes	No	No	No
FBgn0015376	cutlet	Yes	No	Yes	No
FBgn0015393	hoip	Yes	No	No	No
FBgn0015396	jumu	Yes	No	No	No
FBgn0015399	kek1	No	No	No	Yes
FBgn0015477	Rme-8	Yes	Yes	Yes	Yes
FBgn0015509	lin19	Yes	No	No	No
FBgn0015513	mbc	Yes	No	No	No
FBgn0015520	nonA-l	Yes	No	Yes	No
FBgn0015541	sda	Yes	No	No	No
FBgn0015544	spag	Yes	No	No	No
FBgn0015546	spel1	No	No	Yes	Yes
FBgn0015553	tos	Yes	No	No	No
FBgn0015558	tty	Yes	No	Yes	No
FBgn0015562	veg	Yes	No	No	No
FBgn0015565	yin	Yes	No	No	No
FBgn0015600	toc	Yes	No	No	No
FBgn0015602	BEAF-32	Yes	No	No	Yes
FBgn0015609	CadN	Yes	Yes	No	Yes
FBgn0015618	Cdk8	Yes	No	No	No
FBgn0015621	Clp	No	No	No	Yes
FBgn0015623	Cpr	Yes	No	No	No
FBgn0015754	Lis-1	Yes	No	No	No
FBgn0015763	lic	Yes	No	No	No
FBgn0015765	Mpk2	Yes	No	No	Yes
FBgn0015766	Msr-110	Yes	No	No	Yes
FBgn0015774	NetB	Yes	No	No	No
FBgn0015776	nrv1	Yes	Yes	No	Yes
FBgn0015777	nrv2	Yes	No	No	No
FBgn0015778	rin	Yes	No	No	No
FBgn0015793	Rab-RP3	Yes	No	No	No
FBgn0015795	Rab7	Yes	No	No	No
FBgn0015796	Rab8	Yes	No	No	No
FBgn0015801	Reg-5	No	No	No	Yes
FBgn0015803	rtGEF	Yes	No	No	No
FBgn0015805	Rpd3	Yes	No	No	No
FBgn0015808	ScpX	Yes	No	No	No
FBgn0015818	Spx	Yes	No	No	No
FBgn0015903	apt	Yes	No	No	No
FBgn0015924	crq	No	No	No	Yes
FBgn0015925	csul	Yes	No	No	No
FBgn0015929	dpa	Yes	No	Yes	No
FBgn0015949	hrg	No	No	Yes	No
FBgn0016031	lama	No	No	No	Yes
FBgn0016036	mei-P22	Yes	No	No	No
FBgn0016054	phr6-4	Yes	No	No	No
FBgn0016059	Sema-1b	Yes	No	No	No
FBgn0016076	vri	Yes	Yes	Yes	Yes
FBgn0016078	wun	Yes	No	No	No
FBgn0016080	xmas-1	Yes	No	No	No
FBgn0016081	fry	Yes	No	Yes	No
FBgn0016119	ATPsyn-Cf6	Yes	Yes	No	No
FBgn0016122	Acer	Yes	No	Yes	No
FBgn0016126	CaMKI	Yes	No	Yes	Yes
FBgn0016660	H15	No	Yes	No	Yes
FBgn0016691	Oscp	Yes	No	No	No
FBgn0016693	Past1	Yes	No	No	No
FBgn0016696	Pitslre	Yes	No	No	Yes
FBgn0016700	Rab1	Yes	No	No	No
FBgn0016701	Rab4	Yes	No	No	No
FBgn0016715	Reg-2	Yes	Yes	Yes	Yes
FBgn0016754	sba	Yes	No	No	No
FBgn0016756	Ubp64E	No	No	No	Yes
FBgn0016794	dos	Yes	No	Yes	No
FBgn0016797	fz2	Yes	Yes	Yes	Yes
FBgn0016917	Stat92E	Yes	No	No	No
FBgn0016930	smi35A	No	Yes	No	No
FBgn0016940	SmD1	Yes	No	No	No
FBgn0016977	spen	Yes	No	Yes	No
FBgn0016983	smid	Yes	No	No	No
FBgn0017397	how	Yes	Yes	No	Yes
FBgn0017457	U2af38	Yes	No	No	No
FBgn0017545	RpS3A	No	No	Yes	Yes
FBgn0017550	Rga	Yes	No	No	No
FBgn0017551	Rca1	Yes	No	No	No
FBgn0017567	ND23	Yes	No	Yes	Yes
FBgn0017577	Mcm5	Yes	No	No	No
FBgn0017579	RpL14	Yes	No	No	No
FBgn0017581	Lk6	Yes	Yes	No	Yes
FBgn0019624	CoVa	Yes	Yes	No	Yes
FBgn0019662	qm	Yes	No	No	No
FBgn0019686	lok	Yes	No	No	No
FBgn0019886	Letm1	Yes	No	No	No
FBgn0019925	Surf4	Yes	No	No	No
FBgn0019949	Cdk9	Yes	No	No	No
FBgn0019972	Ice	Yes	No	No	No
FBgn0019985	mGluRA	Yes	No	No	No
FBgn0020018	Ppox	Yes	No	No	No
FBgn0020238	14-3-3epsilon	Yes	No	Yes	No
FBgn0020251	sfl	Yes	No	No	No
FBgn0020257	ppa	Yes	Yes	No	Yes
FBgn0020258	ppk	Yes	No	No	No
FBgn0020270	mre11	Yes	No	No	No
FBgn0020272	mst	Yes	No	No	No
FBgn0020277	lush	Yes	No	No	No
FBgn0020278	loco	No	No	Yes	No
FBgn0020279	lig	Yes	No	No	No
FBgn0020280	laf	Yes	No	No	Yes
FBgn0020300	gk	Yes	No	No	No
FBgn0020309	crol	Yes	Yes	Yes	Yes
FBgn0020368	Vha68-1	Yes	No	Yes	Yes
FBgn0020369	Pros45	Yes	No	No	No
FBgn0020372	TM4SF	Yes	No	No	No
FBgn0020386	Pk61C	Yes	No	Yes	No
FBgn0020392	Nmt	No	No	Yes	No
FBgn0020445	E23	Yes	No	No	Yes
FBgn0020493	Dad	Yes	No	No	No
FBgn0020496	CtBP	Yes	Yes	No	Yes
FBgn0020503	CLIP-190	Yes	No	No	No
FBgn0020513	ade5	Yes	No	No	Yes
FBgn0020611	Vha44	Yes	No	Yes	No
FBgn0020617	Rx	Yes	No	No	No
FBgn0020756	DNApol-epsilon	Yes	No	Yes	Yes
FBgn0020764	Alas	No	No	Yes	No
FBgn0020909	Rtc1	Yes	No	No	No
FBgn0020930	Dgkepsilon	Yes	No	No	No
FBgn0021760	chb	No	No	No	Yes
FBgn0021761	Nup154	Yes	No	No	No
FBgn0021765	scu	No	No	No	Yes
FBgn0021768	nudC	Yes	No	No	No
FBgn0021800	l(2)k16918	No	No	No	Yes
FBgn0021814	Vps28	Yes	No	Yes	No
FBgn0021856	l(2)k14505	Yes	No	Yes	No
FBgn0021872	Xbp1	No	No	Yes	No
FBgn0021873	Gef26	Yes	No	Yes	No
FBgn0021953	Fatp	No	No	No	Yes
FBgn0021979	l(2)k09913	Yes	No	No	No
FBgn0021995	Rs1	No	No	No	Yes
FBgn0022027	Vps25	Yes	No	No	No
FBgn0022029	l(2)k01209	Yes	Yes	No	Yes
FBgn0022097	Vha36	Yes	No	No	No
FBgn0022160	Gpo-1	Yes	No	No	No
FBgn0022224	ubl	Yes	No	No	Yes
FBgn0022238	lolal	Yes	No	No	No
FBgn0022246	Rpp30	Yes	No	No	No
FBgn0022288	l(2)09851	Yes	No	Yes	No
FBgn0022338	dnk	Yes	No	No	No
FBgn0022361	Pur-alpha	Yes	No	No	No
FBgn0022382	Pka-R2	Yes	No	Yes	No
FBgn0022708	Adk2	Yes	No	No	No
FBgn0022720	zf30C	Yes	No	No	No
FBgn0022724	Taf8	Yes	No	No	Yes
FBgn0022764	Sin3A	Yes	No	No	No
FBgn0022768	Pp2C1	Yes	No	No	No
FBgn0022770	Peritrophin-A	Yes	No	No	Yes
FBgn0022786	Hira	Yes	No	No	No
FBgn0022893	Df31	Yes	No	No	No
FBgn0022936	CycH	No	Yes	No	Yes
FBgn0022943	Cbp20	Yes	No	No	Yes
FBgn0022981	rpk	Yes	No	Yes	No
FBgn0022987	qkr54B	No	No	No	Yes
FBgn0023001	melt	Yes	Yes	No	Yes
FBgn0023023	CRMP	Yes	No	No	No
FBgn0023130	a6	Yes	No	No	No
FBgn0023170	RpL39	Yes	No	No	No
FBgn0023171	rnh1	Yes	No	No	No
FBgn0023172	RhoGEF2	Yes	Yes	No	Yes
FBgn0023175	Prosalpha7	Yes	No	No	No
FBgn0023180	Orc6	Yes	No	No	No
FBgn0023214	edl	Yes	Yes	No	No
FBgn0023215	Mnt	Yes	Yes	No	Yes
FBgn0023216	Parg	Yes	No	No	No
FBgn0023395	Chd3	Yes	No	Yes	Yes
FBgn0023407	B4	No	Yes	No	Yes
FBgn0023444	ebi	No	Yes	No	Yes
FBgn0023477	Tal	Yes	No	No	No
FBgn0023507	CG3835	Yes	No	No	No
FBgn0023509	mip130	Yes	Yes	Yes	Yes
FBgn0023510	Rbcn-3B	Yes	No	No	No
FBgn0023513	CG14803	Yes	No	No	No
FBgn0023521	CG3587	Yes	Yes	No	Yes
FBgn0023524	CG3078	Yes	No	No	No
FBgn0023525	CG3191	Yes	No	No	No
FBgn0023526	CG2865	Yes	Yes	Yes	Yes
FBgn0023527	CG3071	Yes	Yes	Yes	Yes
FBgn0023536	CG3156	Yes	No	No	No
FBgn0023545	CG4406	Yes	Yes	Yes	Yes
FBgn0023546	Hr4	Yes	No	No	No
FBgn0024184	unc-4	No	No	No	Yes
FBgn0024188	san	Yes	No	No	No
FBgn0024194	rasp	Yes	No	No	No
FBgn0024196	robl	Yes	No	No	No
FBgn0024230	Hs2st	No	No	No	Yes
FBgn0024234	gbb	Yes	No	No	No
FBgn0024238	Fim	No	No	No	Yes
FBgn0024244	drm	Yes	No	No	No
FBgn0024248	chico	Yes	No	No	No
FBgn0024250	brk	Yes	Yes	No	Yes
FBgn0024251	bbx	No	Yes	Yes	Yes
FBgn0024252	Ark	Yes	No	No	No
FBgn0024277	trio	Yes	No	No	No
FBgn0024285	Srp54	Yes	No	No	No
FBgn0024289	Sodh-1	Yes	Yes	Yes	No
FBgn0024294	Spn43Aa	Yes	No	Yes	Yes
FBgn0024308	Smr	Yes	Yes	Yes	Yes
FBgn0024320	Npc1a	Yes	No	No	No
FBgn0024321	NK7.1	Yes	No	Yes	No
FBgn0024326	Mkk4	Yes	Yes	No	No
FBgn0024329	Mekk1	Yes	Yes	No	Yes
FBgn0024362	CG11412	Yes	No	No	No
FBgn0024371	E2f2	Yes	No	Yes	No
FBgn0024432	Dlc90F	Yes	No	Yes	No
FBgn0024509	sec13	No	No	No	Yes
FBgn0024728	Slip1	Yes	No	No	No
FBgn0024733	Qm	Yes	No	No	No
FBgn0024807	DIP1	Yes	Yes	Yes	Yes
FBgn0024814	Clc	Yes	No	Yes	No
FBgn0024846	p38b	Yes	Yes	No	Yes
FBgn0024909	Taf7	Yes	No	No	Yes
FBgn0024912	agt	Yes	No	No	No
FBgn0024920	Ts	Yes	No	No	No
FBgn0024921	Trn	No	No	No	Yes
FBgn0024939	RpL8	No	No	No	Yes
FBgn0024945	NitFhit	Yes	No	No	No
FBgn0024947	NTPase	Yes	No	No	No
FBgn0024956	Mat1	Yes	No	No	No
FBgn0024958	Irp-1A	Yes	No	No	No
FBgn0024975	CG2712	No	No	No	Yes
FBgn0024977	CG2709	Yes	No	No	No
FBgn0024983	CG4293	Yes	No	No	No
FBgn0024984	CG3457	Yes	No	No	No
FBgn0024988	CG42666	Yes	Yes	No	Yes
FBgn0024991	CG2694	Yes	No	No	No
FBgn0024993	CG2662	Yes	No	No	No
FBgn0024996	eIF2B-beta	No	Yes	No	Yes
FBgn0024997	CG2681	Yes	No	Yes	No
FBgn0025111	Ant2	Yes	No	No	No
FBgn0025117	und	Yes	No	No	Yes
FBgn0025140	pit	Yes	No	No	No
FBgn0025185	az2	No	No	Yes	No
FBgn0025334	PHDP	Yes	No	Yes	No
FBgn0025335	CG4585	Yes	No	No	No
FBgn0025352	Thiolase	Yes	Yes	No	Yes
FBgn0025382	Rab27	Yes	No	No	No
FBgn0025383	CG14780	Yes	No	No	No
FBgn0025390	Mur2B	Yes	No	No	No
FBgn0025394	CG32810	Yes	No	No	No
FBgn0025454	Cyp6g1	Yes	No	No	No
FBgn0025456	CREG	No	Yes	No	Yes
FBgn0025458	BubR1	Yes	No	No	No
FBgn0025469	slv	Yes	Yes	No	Yes
FBgn0025558	CG4101	Yes	No	No	No
FBgn0025571	SF1	Yes	Yes	No	Yes
FBgn0025573	PpN58A	Yes	No	No	No
FBgn0025574	Pli	Yes	No	Yes	Yes
FBgn0025578	Lcp9	No	No	Yes	No
FBgn0025592	Gyk	Yes	No	No	No
FBgn0025612	CG3062	Yes	No	No	No
FBgn0025615	torp4a	Yes	No	No	No
FBgn0025616	CG13359	Yes	No	Yes	No
FBgn0025620	CG13360	Yes	No	No	No
FBgn0025621	CG16989	Yes	No	Yes	No
FBgn0025624	CG4025	Yes	No	Yes	No
FBgn0025628	CG4199	Yes	No	No	No
FBgn0025634	CG13367	Yes	No	No	No
FBgn0025635	CG17829	Yes	No	No	No
FBgn0025637	skpA	Yes	No	Yes	No
FBgn0025639	Suv4-20	Yes	No	Yes	Yes
FBgn0025640	CG13369	Yes	No	No	No
FBgn0025641	DAAM	Yes	Yes	No	No
FBgn0025642	CG32812	Yes	No	No	No
FBgn0025674	CycK	Yes	No	No	Yes
FBgn0025676	CkIIalpha-i3	Yes	No	No	No
FBgn0025681	CG3558	Yes	No	No	No
FBgn0025686	CG11592	Yes	No	No	No
FBgn0025698	kcc	Yes	No	No	No
FBgn0025712	CG13920	Yes	No	No	No
FBgn0025725	alphaCop	Yes	No	No	No
FBgn0025726	unc-13	Yes	No	No	No
FBgn0025740	plexB	Yes	No	No	Yes
FBgn0025741	plexA	Yes	No	No	Yes
FBgn0025777	homer	Yes	No	No	No
FBgn0025781	cdc16	Yes	No	No	No
FBgn0025800	Smox	Yes	No	No	No
FBgn0025802	Sbf	Yes	No	No	No
FBgn0025803	SNF4Agamma	Yes	Yes	No	Yes
FBgn0025806	Rap2l	Yes	No	No	No
FBgn0025807	Rad9	Yes	No	No	No
FBgn0025814	Mgstl	Yes	No	No	No
FBgn0025825	Hdac3	Yes	No	No	No
FBgn0025830	CG5859	Yes	No	No	No
FBgn0025835	CG17707	Yes	No	No	No
FBgn0025836	RhoGAP1A	Yes	No	No	No
FBgn0025837	CG17636	Yes	No	Yes	No
FBgn0025839	CG3621	Yes	No	No	No
FBgn0025864	Crag	Yes	No	No	No
FBgn0025874	Meics	Yes	No	Yes	No
FBgn0025885	Inos	Yes	Yes	No	Yes
FBgn0025936	Eph	Yes	No	Yes	No
FBgn0026058	OdsH	No	No	Yes	No
FBgn0026060	Mipp2	Yes	No	No	No
FBgn0026061	Mipp1	Yes	No	Yes	No
FBgn0026083	CG4857	Yes	No	No	No
FBgn0026085	dgt4	Yes	No	No	No
FBgn0026086	Adar	Yes	No	No	No
FBgn0026087	CG3600	Yes	No	No	Yes
FBgn0026144	CBP	Yes	No	Yes	No
FBgn0026148	CG12253	No	No	Yes	No
FBgn0026160	tna	Yes	Yes	No	Yes
FBgn0026170	smt3	Yes	No	Yes	Yes
FBgn0026173	slim	Yes	No	No	Yes
FBgn0026176	skpB	Yes	No	Yes	No
FBgn0026179	siz	Yes	Yes	No	Yes
FBgn0026188	ps	Yes	No	No	No
FBgn0026192	par-6	No	No	No	Yes
FBgn0026199	myoglianin	Yes	No	No	No
FBgn0026206	mei-P26	Yes	No	No	No
FBgn0026238	gus	Yes	No	Yes	No
FBgn0026257	cav	Yes	No	Yes	Yes
FBgn0026261	bonsai	Yes	No	No	No
FBgn0026262	bip2	Yes	No	No	Yes
FBgn0026309	aft	Yes	No	No	No
FBgn0026320	Tom	Yes	No	No	No
FBgn0026361	2010-09-05	Yes	No	Yes	No
FBgn0026369	Sara	Yes	No	No	No
FBgn0026370	SRPK	Yes	No	No	No
FBgn0026371	SAK	No	No	Yes	No
FBgn0026373	RpII33	Yes	No	No	No
FBgn0026374	Rhp	No	Yes	No	No
FBgn0026376	Rgl	Yes	No	No	No
FBgn0026379	Pten	Yes	No	Yes	No
FBgn0026388	Or46a	Yes	No	No	No
FBgn0026401	Nipped-B	Yes	No	No	No
FBgn0026418	Hsc70Cb	Yes	No	Yes	No
FBgn0026428	HDAC6	Yes	No	No	No
FBgn0026432	Grip163	Yes	No	No	No
FBgn0026433	Grip128	Yes	No	No	No
FBgn0026533	Dek	No	No	No	Yes
FBgn0026566	CG1307	Yes	No	No	No
FBgn0026573	CG8290	Yes	No	No	Yes
FBgn0026576	CG5991	Yes	No	No	Yes
FBgn0026577	CG8677	Yes	No	No	No
FBgn0026582	CG9418	Yes	No	No	No
FBgn0026585	Ent2	Yes	Yes	Yes	Yes
FBgn0026598	Apc2	Yes	No	No	Yes
FBgn0026611	AGO1	Yes	No	Yes	No
FBgn0026616	alpha-Man-IIb	Yes	No	Yes	No
FBgn0026620	tacc	Yes	No	No	No
FBgn0026630	nes	Yes	No	No	No
FBgn0026634	ldlCp	Yes	No	No	No
FBgn0026713	l(1)G0007	Yes	No	No	Yes
FBgn0026718	fu12	Yes	No	No	No
FBgn0026722	drosha	Yes	No	No	No
FBgn0026737	CG6171	Yes	No	No	No
FBgn0026741	mRpL18	Yes	No	Yes	No
FBgn0026751	XRCC1	No	No	No	Yes
FBgn0026753	Vha13	No	No	No	Yes
FBgn0026754	Ugt37c1	Yes	No	No	No
FBgn0026758	Trf2	Yes	No	No	No
FBgn0026778	Rad1	Yes	No	No	No
FBgn0026781	Prosalpha1	No	No	Yes	No
FBgn0026872	CG14777	Yes	No	No	No
FBgn0026873	MED18	Yes	No	Yes	No
FBgn0026874	CG13358	Yes	No	No	No
FBgn0026875	CG3638	No	Yes	No	Yes
FBgn0026876	CG11403	Yes	No	No	No
FBgn0026878	CG4325	Yes	No	No	No
FBgn0027052	CHIP	Yes	No	No	No
FBgn0027053	CSN5	No	No	No	Yes
FBgn0027054	CSN4	Yes	Yes	No	Yes
FBgn0027057	CSN1b	Yes	No	No	Yes
FBgn0027066	Eb1	Yes	No	No	No
FBgn0027079	Aats-val	Yes	No	No	No
FBgn0027081	Aats-thr	Yes	No	No	No
FBgn0027088	Aats-gly	No	No	No	Yes
FBgn0027091	Aats-cys	Yes	No	No	No
FBgn0027094	Aats-ala	Yes	No	No	No
FBgn0027095	Manf	Yes	No	No	No
FBgn0027103	sec10	Yes	No	No	No
FBgn0027108	inx2	Yes	No	No	No
FBgn0027279	l(1)G0196	Yes	No	No	No
FBgn0027339	jim	Yes	No	Yes	Yes
FBgn0027358	Tim9b	Yes	No	No	No
FBgn0027359	Tim8	Yes	No	No	No
FBgn0027360	Tim10	No	No	No	Yes
FBgn0027375	RecQ5	Yes	No	No	No
FBgn0027491	Cdk5alpha	Yes	No	No	No
FBgn0027497	Madm	Yes	No	No	No
FBgn0027498	CG2061	Yes	No	No	No
FBgn0027499	wde	No	Yes	No	No
FBgn0027504	CG8878	No	No	Yes	No
FBgn0027507	CG1344	Yes	Yes	Yes	No
FBgn0027509	CG7261	Yes	No	No	No
FBgn0027512	CG10254	Yes	No	No	No
FBgn0027515	CG7115	Yes	No	No	Yes
FBgn0027521	CG3679	Yes	No	No	No
FBgn0027526	CG6697	Yes	No	No	No
FBgn0027528	CG9634	Yes	Yes	No	Yes
FBgn0027529	CG8920	Yes	No	Yes	No
FBgn0027532	CG7139	No	No	No	Yes
FBgn0027534	CG11006	Yes	No	No	No
FBgn0027544	CG2217	Yes	No	No	No
FBgn0027546	CG4766	Yes	Yes	No	No
FBgn0027548	nito	No	No	No	Yes
FBgn0027553	NELF-B	No	No	Yes	No
FBgn0027560	Tps1	Yes	No	No	No
FBgn0027564	CG3149	Yes	Yes	No	Yes
FBgn0027565	CG5498	Yes	No	No	No
FBgn0027569	cert	Yes	No	No	No
FBgn0027572	CG5009	No	No	No	Yes
FBgn0027574	CG5815	Yes	No	No	Yes
FBgn0027579	CG5508	Yes	No	Yes	No
FBgn0027580	CG1516	No	Yes	No	Yes
FBgn0027581	CG6191	Yes	No	Yes	No
FBgn0027588	CG14476	Yes	No	Yes	No
FBgn0027593	Exn	Yes	Yes	No	Yes
FBgn0027594	drpr	Yes	No	Yes	No
FBgn0027596	CG10249	No	Yes	No	No
FBgn0027601	CG9009	No	Yes	No	Yes
FBgn0027602	CG8611	Yes	No	No	No
FBgn0027610	CG8790	No	Yes	No	No
FBgn0027620	Acf1	Yes	No	No	No
FBgn0027621	Pfrx	Yes	No	No	No
FBgn0027660	blot	Yes	No	No	No
FBgn0027786	Mtch	Yes	No	No	No
FBgn0027790	GV1	Yes	No	No	No
FBgn0027842	whd	No	No	No	Yes
FBgn0027864	Ogg1	Yes	No	No	Yes
FBgn0027872	rdgBbeta	Yes	No	No	No
FBgn0027873	Cpsf100	Yes	No	No	Yes
FBgn0027903	CG12018	Yes	No	No	Yes
FBgn0027914	Gen	Yes	No	No	No
FBgn0027932	Akap200	Yes	No	No	Yes
FBgn0027945	ppl	Yes	No	No	No
FBgn0027949	msb1l	Yes	No	No	No
FBgn0027950	MBD-like	Yes	No	No	No
FBgn0027951	MTA1-like	Yes	No	No	No
FBgn0028292	ric8a	Yes	No	No	No
FBgn0028325	l(1)G0334	Yes	No	No	No
FBgn0028341	l(1)G0232	Yes	No	No	No
FBgn0028343	l(1)G0222	No	Yes	No	Yes
FBgn0028369	kirre	Yes	Yes	No	No
FBgn0028372	isopeptidase-T-3	Yes	No	No	No
FBgn0028373	inx3	Yes	No	No	No
FBgn0028379	fan	Yes	No	No	No
FBgn0028382	cyp33	Yes	No	No	No
FBgn0028386	cic	Yes	Yes	No	Yes
FBgn0028387	chm	No	No	No	Yes
FBgn0028388	capt	Yes	Yes	No	Yes
FBgn0028394	CG17834	Yes	Yes	No	Yes
FBgn0028398	Taf10	Yes	No	No	No
FBgn0028402	Sin	No	No	No	Yes
FBgn0028408	Drep-2	Yes	No	No	No
FBgn0028411	Nxt1	Yes	No	No	No
FBgn0028420	Kr-h1	Yes	No	No	No
FBgn0028421	Kap3	Yes	No	No	No
FBgn0028427	Ilk	Yes	No	No	No
FBgn0028434	Ercc1	Yes	No	Yes	No
FBgn0028468	rtet	Yes	No	No	No
FBgn0028471	CG5720	No	No	No	Yes
FBgn0028476	CG15817	Yes	No	No	No
FBgn0028484	Ack	Yes	No	Yes	No
FBgn0028509	cenG1A	Yes	Yes	No	Yes
FBgn0028515	EndoGI	Yes	No	No	No
FBgn0028525	c(2)M	Yes	No	Yes	No
FBgn0028527	CG18507	Yes	No	Yes	Yes
FBgn0028530	mTTF	Yes	No	No	No
FBgn0028539	CG31731	Yes	No	No	No
FBgn0028541	TM9SF4	Yes	No	No	No
FBgn0028552	gammaSnap	Yes	No	No	No
FBgn0028563	sut1	Yes	No	No	No
FBgn0028572	qtc	Yes	No	No	No
FBgn0028579	phtf	Yes	No	No	No
FBgn0028581	mei-217	Yes	No	No	No
FBgn0028622	l(2)05510	Yes	No	No	No
FBgn0028642	esn	Yes	Yes	No	No
FBgn0028648	mRpL50	Yes	No	No	No
FBgn0028658	adat	Yes	No	No	No
FBgn0028664	VhaM9.7-1	Yes	No	No	No
FBgn0028665	VhaAC39	Yes	No	No	No
FBgn0028669	Vha100-3	Yes	No	Yes	Yes
FBgn0028675	Sur	Yes	No	No	No
FBgn0028686	Rpt3	Yes	No	Yes	No
FBgn0028690	Rpn5	Yes	No	No	Yes
FBgn0028693	Rpn12	Yes	No	Yes	No
FBgn0028695	Rpn1	Yes	No	Yes	No
FBgn0028703	Nhe3	No	No	No	Yes
FBgn0028707	Mt2	Yes	No	Yes	No
FBgn0028708	Mst85C	Yes	No	Yes	No
FBgn0028734	Fmr1	Yes	No	No	No
FBgn0028737	Ef1beta	Yes	No	Yes	No
FBgn0028746	CG18508	Yes	Yes	No	Yes
FBgn0028789	Doc1	No	No	No	Yes
FBgn0028833	Dak1	Yes	No	Yes	No
FBgn0028836	CSN7	Yes	No	No	No
FBgn0028837	CSN6	Yes	No	No	No
FBgn0028844	CG15283	Yes	Yes	No	Yes
FBgn0028852	CG15262	Yes	No	No	No
FBgn0028871	Cpr35B	Yes	Yes	Yes	No
FBgn0028891	CG18482	Yes	Yes	Yes	Yes
FBgn0028913	CG3473	Yes	No	Yes	Yes
FBgn0028915	l(2)34Fc	Yes	No	No	No
FBgn0028925	l(2)35Bc	Yes	No	No	No
FBgn0028931	CG16863	Yes	No	No	No
FBgn0028953	CG14478	Yes	No	No	Yes
FBgn0028955	CG8788	Yes	No	No	No
FBgn0028962	Aats-ala-m	Yes	No	No	No
FBgn0028968	gammaCop	Yes	No	No	No
FBgn0028969	deltaCOP	Yes	Yes	No	Yes
FBgn0028978	trbl	No	Yes	No	No
FBgn0028979	tio	Yes	No	No	Yes
FBgn0028982	Spt6	No	No	No	Yes
FBgn0028983	Spn6	Yes	No	No	No
FBgn0028984	Spn5	Yes	No	Yes	Yes
FBgn0028996	onecut	Yes	No	Yes	No
FBgn0028997	nmdyn-D7	Yes	No	No	No
FBgn0029003	mab-21	Yes	Yes	No	Yes
FBgn0029092	ced-6	Yes	Yes	No	Yes
FBgn0029094	asf1	Yes	No	No	No
FBgn0029095	aru	Yes	No	Yes	No
FBgn0029105	alpha-catenin-related	Yes	No	No	No
FBgn0029114	Tollo	Yes	Yes	No	Yes
FBgn0029117	Surf1	Yes	No	No	No
FBgn0029118	Sucb	Yes	No	No	No
FBgn0029121	Sras	Yes	No	No	No
FBgn0029137	Patsas	Yes	No	No	No
FBgn0029148	NHP2	Yes	No	No	No
FBgn0029158	Las	Yes	No	No	No
FBgn0029172	Fad2	No	No	Yes	No
FBgn0029173	fu2	Yes	No	No	No
FBgn0029175	Ext2	Yes	No	Yes	No
FBgn0029504	CHES-1-like	Yes	Yes	No	Yes
FBgn0029507	Tsp42Ed	Yes	No	Yes	No
FBgn0029508	Tsp42Ea	Yes	No	No	No
FBgn0029514	312	Yes	No	No	No
FBgn0029522	CG13373	Yes	No	Yes	No
FBgn0029524	CG3176	Yes	No	Yes	No
FBgn0029573	CG14770	Yes	No	No	No
FBgn0029580	CG14778	Yes	No	No	No
FBgn0029594	CG14806	Yes	Yes	No	Yes
FBgn0029606	CG14052	Yes	No	Yes	No
FBgn0029608	CG3091	Yes	No	Yes	No
FBgn0029649	CG4116	Yes	No	No	Yes
FBgn0029658	CG14269	Yes	No	No	Yes
FBgn0029663	CG10804	Yes	No	No	No
FBgn0029664	CG10802	Yes	Yes	No	Yes
FBgn0029686	CG2941	Yes	No	Yes	No
FBgn0029687	Vap-33-1	Yes	No	Yes	No
FBgn0029688	lva	Yes	No	No	No
FBgn0029689	CG6428	Yes	No	No	No
FBgn0029694	CG15375	Yes	No	No	No
FBgn0029704	CG2982	Yes	No	No	No
FBgn0029708	CG3556	Yes	No	No	No
FBgn0029709	CHOp24	Yes	No	No	No
FBgn0029710	CG3568	Yes	No	No	No
FBgn0029718	mRpL30	Yes	No	No	No
FBgn0029723	Proc-R	Yes	No	No	No
FBgn0029733	CG6927	Yes	No	No	No
FBgn0029753	CG4198	Yes	No	No	No
FBgn0029754	CG15930	Yes	No	Yes	No
FBgn0029763	CG4165	Yes	No	No	No
FBgn0029765	CG16756	Yes	No	No	No
FBgn0029783	Sirt4	Yes	No	No	No
FBgn0029785	RpL35	Yes	No	Yes	Yes
FBgn0029791	CG4096	No	No	No	Yes
FBgn0029798	CG4078	Yes	Yes	Yes	Yes
FBgn0029799	CG15772	Yes	No	No	No
FBgn0029800	lin-52	Yes	No	Yes	No
FBgn0029801	CG15771	Yes	No	No	No
FBgn0029819	CG3016	Yes	No	No	No
FBgn0029820	CG16721	Yes	No	No	No
FBgn0029821	CG4020	Yes	No	No	No
FBgn0029822	CG12236	Yes	No	No	No
FBgn0029824	CG3726	No	Yes	No	Yes
FBgn0029825	CG12728	Yes	No	No	No
FBgn0029831	CG5966	Yes	No	No	No
FBgn0029834	CG5937	Yes	No	No	No
FBgn0029843	Nep1	Yes	No	No	No
FBgn0029849	Efr	Yes	No	No	No
FBgn0029851	CG14445	Yes	No	No	No
FBgn0029861	CG3815	Yes	No	No	Yes
FBgn0029866	CG3842	Yes	Yes	No	Yes
FBgn0029867	CG3847	No	No	No	Yes
FBgn0029874	CG3342	Yes	No	No	No
FBgn0029877	CG17717	No	No	No	Yes
FBgn0029878	Pat1	Yes	No	Yes	No
FBgn0029880	CG14443	Yes	No	No	No
FBgn0029881	pigs	Yes	No	Yes	No
FBgn0029888	CG3192	Yes	No	No	No
FBgn0029890	CG4095	Yes	No	No	No
FBgn0029891	Pink1	Yes	No	No	No
FBgn0029896	CG3168	Yes	No	No	No
FBgn0029906	CG4542	Yes	No	No	No
FBgn0029914	CG4558	Yes	No	No	No
FBgn0029915	CG14434	Yes	Yes	Yes	Yes
FBgn0029924	CG4586	No	No	No	Yes
FBgn0029925	CG3040	Yes	No	No	No
FBgn0029929	CG4593	Yes	No	No	No
FBgn0029936	CG4617	Yes	No	No	No
FBgn0029939	CG9650	Yes	No	No	No
FBgn0029942	CG2059	Yes	No	No	No
FBgn0029944	Dok	No	Yes	No	Yes
FBgn0029951	CG11369	Yes	No	No	No
FBgn0029957	CG12155	Yes	Yes	No	Yes
FBgn0029958	Pdp	Yes	No	No	No
FBgn0029959	Rab39	No	No	No	Yes
FBgn0029971	CG18624	Yes	Yes	No	Yes
FBgn0029974	dpr14	Yes	No	No	No
FBgn0029975	CG1444	Yes	No	No	No
FBgn0029976	snz	Yes	No	No	No
FBgn0029977	hdm	Yes	No	No	No
FBgn0029979	CG10777	Yes	No	No	No
FBgn0029980	CG10778	Yes	No	No	No
FBgn0029993	CG1571	Yes	No	No	No
FBgn0029996	Ubc-E2H	Yes	Yes	No	Yes
FBgn0030001	cyr	Yes	No	No	No
FBgn0030003	CG2116	Yes	No	No	No
FBgn0030004	CG10958	Yes	No	No	No
FBgn0030006	CG17982	Yes	No	No	No
FBgn0030007	CG2263	Yes	No	No	No
FBgn0030009	CG15336	Yes	No	No	No
FBgn0030012	CG18262	Yes	No	No	No
FBgn0030015	CG10761	Yes	No	No	No
FBgn0030016	Or7a	Yes	No	No	No
FBgn0030025	CG2147	Yes	No	No	No
FBgn0030027	CG1632	Yes	Yes	No	Yes
FBgn0030040	CG15347	Yes	No	No	No
FBgn0030048	CG12112	Yes	No	No	Yes
FBgn0030049	Trf4-1	Yes	No	No	No
FBgn0030050	CG12111	Yes	No	No	No
FBgn0030052	CG12065	Yes	No	No	No
FBgn0030053	CG12081	Yes	No	No	No
FBgn0030055	CG12772	Yes	No	No	No
FBgn0030056	CG11284	Yes	Yes	No	Yes
FBgn0030063	CG1789	Yes	Yes	No	Yes
FBgn0030065	CG12075	No	No	No	Yes
FBgn0030066	CG1885	Yes	No	No	No
FBgn0030067	Rbm13	Yes	No	Yes	No
FBgn0030073	CG10962	No	Yes	No	No
FBgn0030078	CG10970	No	No	No	Yes
FBgn0030079	CG7267	Yes	No	No	No
FBgn0030082	HP1b	Yes	No	Yes	Yes
FBgn0030085	CG6999	Yes	No	Yes	No
FBgn0030088	CG7039	Yes	No	No	No
FBgn0030089	AP-1gamma	Yes	No	No	No
FBgn0030091	CG7065	Yes	No	No	No
FBgn0030092	fh	Yes	No	No	No
FBgn0030096	Zpr1	Yes	No	No	No
FBgn0030098	CG12057	Yes	No	No	No
FBgn0030099	CG12056	Yes	No	No	No
FBgn0030109	CG12121	Yes	No	No	No
FBgn0030121	CG17446	Yes	No	No	No
FBgn0030136	RpS28b	No	No	No	Yes
FBgn0030137	CG15317	Yes	No	Yes	No
FBgn0030141	Gga	Yes	No	Yes	No
FBgn0030150	nej	Yes	Yes	No	Yes
FBgn0030170	CG2990	Yes	No	No	No
FBgn0030191	CG15306	Yes	No	No	No
FBgn0030196	Psf3	Yes	No	No	No
FBgn0030206	CG2889	Yes	No	No	No
FBgn0030208	PPP4R2r	Yes	No	No	No
FBgn0030230	Rph	Yes	No	Yes	No
FBgn0030235	Imp	Yes	No	No	No
FBgn0030239	CG17333	Yes	No	Yes	No
FBgn0030240	CG2202	Yes	No	No	No
FBgn0030242	sofe	Yes	No	No	No
FBgn0030246	CG1582	No	Yes	No	Yes
FBgn0030251	CG2145	Yes	Yes	No	No
FBgn0030262	Vago	Yes	No	No	No
FBgn0030263	CG2076	Yes	No	No	No
FBgn0030269	CG18292	Yes	No	No	Yes
FBgn0030274	CG1908	Yes	No	No	No
FBgn0030286	CG1657	Yes	No	No	No
FBgn0030291	CG1738	Yes	No	No	Yes
FBgn0030299	CG11727	No	No	No	Yes
FBgn0030301	HP5	Yes	No	No	No
FBgn0030302	CG15194	Yes	No	No	No
FBgn0030311	CG11699	No	No	No	Yes
FBgn0030313	CG11697	Yes	Yes	Yes	Yes
FBgn0030316	CG11695	Yes	No	No	No
FBgn0030323	CG2371	Yes	No	No	No
FBgn0030328	Amun	No	No	Yes	No
FBgn0030329	prtp	Yes	Yes	No	Yes
FBgn0030336	CG1578	Yes	No	No	No
FBgn0030342	CG10347	Yes	No	No	No
FBgn0030345	CG1847	Yes	No	No	No
FBgn0030347	CG15739	Yes	No	Yes	No
FBgn0030348	CG10352	Yes	No	No	No
FBgn0030349	CG10353	Yes	No	Yes	No
FBgn0030357	Sclp	No	Yes	No	Yes
FBgn0030362	regucalcin	Yes	No	No	No
FBgn0030364	CG15735	Yes	No	No	No
FBgn0030367	Cyp311a1	Yes	No	Yes	No
FBgn0030400	CG11138	Yes	Yes	Yes	Yes
FBgn0030407	CG2543	Yes	No	Yes	Yes
FBgn0030409	CG15728	Yes	No	No	No
FBgn0030411	CG2540	Yes	No	Yes	No
FBgn0030418	CG4004	Yes	Yes	Yes	Yes
FBgn0030432	CG4404	Yes	No	No	No
FBgn0030455	CG4318	Yes	No	No	No
FBgn0030456	CG4332	Yes	No	No	No
FBgn0030457	CG12096	Yes	Yes	Yes	Yes
FBgn0030466	CG15744	Yes	No	No	No
FBgn0030469	CG15745	No	No	No	Yes
FBgn0030478	CG1640	Yes	No	No	No
FBgn0030481	CG1662	No	No	No	Yes
FBgn0030482	CG1673	Yes	No	No	Yes
FBgn0030484	CG1681	Yes	Yes	No	Yes
FBgn0030485	CG1998	Yes	Yes	No	No
FBgn0030494	Cpr12A	Yes	No	Yes	Yes
FBgn0030501	BthD	Yes	No	No	No
FBgn0030503	Tango2	No	No	No	Yes
FBgn0030520	CG10990	Yes	No	No	No
FBgn0030522	CG11103	No	No	No	Yes
FBgn0030536	CG11068	Yes	No	No	No
FBgn0030545	CG11590	Yes	No	No	No
FBgn0030554	CG1434	No	Yes	No	No
FBgn0030573	nmdyn-D6	Yes	No	No	No
FBgn0030599	CG9030	Yes	No	No	No
FBgn0030603	CG5541	Yes	No	No	Yes
FBgn0030608	Lsd-2	No	Yes	No	Yes
FBgn0030610	CG9065	No	Yes	No	No
FBgn0030616	RpL37a	Yes	No	No	No
FBgn0030617	CG9095	No	Yes	No	Yes
FBgn0030625	CG5877	Yes	No	No	No
FBgn0030629	CG9123	Yes	No	No	No
FBgn0030630	CG12608	Yes	No	No	No
FBgn0030638	CG11655	Yes	No	Yes	No
FBgn0030646	CG9203	Yes	No	No	No
FBgn0030647	CG6324	Yes	No	Yes	No
FBgn0030648	CG6340	Yes	No	Yes	No
FBgn0030653	CG7860	No	Yes	No	No
FBgn0030657	cerv	Yes	No	No	No
FBgn0030660	CG8097	Yes	No	No	Yes
FBgn0030663	CG8117	No	No	No	Yes
FBgn0030668	CG8128	Yes	No	No	Yes
FBgn0030669	CG9240	Yes	No	No	No
FBgn0030670	Pis	Yes	No	No	Yes
FBgn0030673	CG15601	Yes	No	No	No
FBgn0030675	CG8191	Yes	No	No	No
FBgn0030676	CG12379	Yes	No	No	No
FBgn0030678	CG11679	Yes	No	No	No
FBgn0030679	CG8206	Yes	No	No	Yes
FBgn0030685	Graf	Yes	No	Yes	No
FBgn0030691	CG8959	Yes	No	Yes	No
FBgn0030693	CG8974	Yes	No	No	No
FBgn0030695	PGRP-LE	Yes	No	No	No
FBgn0030697	CG8565	Yes	No	Yes	No
FBgn0030699	CG8578	Yes	No	No	No
FBgn0030703	MSBP	Yes	No	No	No
FBgn0030704	CG15916	Yes	No	Yes	No
FBgn0030706	CG8909	Yes	No	Yes	No
FBgn0030710	CG8924	No	No	Yes	No
FBgn0030711	CG8928	Yes	No	No	No
FBgn0030716	CG9170	Yes	No	Yes	No
FBgn0030717	CG8931	Yes	No	Yes	No
FBgn0030718	CG9172	No	No	No	Yes
FBgn0030721	CG12698	Yes	No	No	No
FBgn0030731	CG3415	Yes	No	No	No
FBgn0030735	CG3632	Yes	No	No	No
FBgn0030739	CG13957	Yes	No	No	No
FBgn0030740	CG9917	Yes	No	No	No
FBgn0030742	CG9919	Yes	No	Yes	No
FBgn0030749	Anxb11	Yes	No	No	No
FBgn0030753	CG4420	Yes	No	No	No
FBgn0030757	CG9902	Yes	No	No	No
FBgn0030765	SmG	Yes	No	No	No
FBgn0030778	CG4678	Yes	No	No	No
FBgn0030790	CG4768	Yes	No	No	No
FBgn0030791	CG9132	Yes	No	No	No
FBgn0030792	CG4789	Yes	No	No	No
FBgn0030793	CG9125	Yes	No	No	No
FBgn0030797	CG13004	No	Yes	No	Yes
FBgn0030801	Rcp	Yes	No	Yes	No
FBgn0030803	CG4880	Yes	No	No	No
FBgn0030809	CG9086	Yes	No	No	No
FBgn0030816	CG16700	Yes	No	No	Yes
FBgn0030832	CG10597	Yes	No	No	No
FBgn0030833	CG8915	Yes	No	Yes	No
FBgn0030839	CG5613	Yes	No	No	No
FBgn0030841	CG8568	Yes	No	No	No
FBgn0030842	CG8557	Yes	Yes	No	Yes
FBgn0030844	ppk23	Yes	Yes	No	Yes
FBgn0030847	CG12991	Yes	No	Yes	No
FBgn0030850	CG8408	Yes	No	No	No
FBgn0030851	CG8326	Yes	No	No	No
FBgn0030852	CG8316	Yes	No	Yes	No
FBgn0030863	CG8188	No	Yes	No	No
FBgn0030866	CG42684	Yes	No	Yes	No
FBgn0030868	CG12986	No	No	Yes	Yes
FBgn0030869	Socs16D	Yes	No	No	No
FBgn0030870	CG6398	Yes	Yes	No	Yes
FBgn0030876	CG6762	Yes	No	No	No
FBgn0030880	CG6788	Yes	No	No	No
FBgn0030883	CG7772	Yes	No	No	No
FBgn0030884	CG6847	Yes	No	No	Yes
FBgn0030893	RhoGAP16F	No	No	No	Yes
FBgn0030895	CG7135	Yes	No	No	No
FBgn0030905	CG15059	No	Yes	No	No
FBgn0030926	psh	Yes	No	No	No
FBgn0030928	CG15044	Yes	No	No	No
FBgn0030931	Rad51D	Yes	No	Yes	No
FBgn0030946	CG6659	No	No	No	Yes
FBgn0030955	CG6891	No	Yes	No	Yes
FBgn0030963	CG7101	Yes	No	No	No
FBgn0030966	CG7280	No	Yes	No	Yes
FBgn0030968	CG7322	Yes	No	No	No
FBgn0030973	CG7332	Yes	No	No	No
FBgn0030976	CG7378	No	No	No	Yes
FBgn0030989	inx5	No	Yes	No	No
FBgn0030994	CG14193	Yes	No	No	No
FBgn0030995	CG7914	Yes	No	No	No
FBgn0030997	CG7990	Yes	No	No	No
FBgn0031002	CG14196	Yes	No	No	No
FBgn0031011	CG8034	No	Yes	No	Yes
FBgn0031016	kek5	Yes	No	No	No
FBgn0031030	Tao-1	Yes	No	No	No
FBgn0031032	CG14204	Yes	No	No	No
FBgn0031035	RpS10b	Yes	No	No	No
FBgn0031036	CG14220	Yes	No	No	No
FBgn0031041	CG12788	Yes	No	No	No
FBgn0031042	CG14221	Yes	No	No	No
FBgn0031043	CG14222	Yes	No	No	No
FBgn0031049	Sec61gamma	No	No	No	Yes
FBgn0031050	Arp11	No	No	No	Yes
FBgn0031054	CG14216	No	No	No	Yes
FBgn0031057	Ubqn	Yes	No	No	No
FBgn0031058	CG14227	Yes	No	No	No
FBgn0031059	CG14229	Yes	No	No	No
FBgn0031062	CG14230	No	No	Yes	No
FBgn0031065	CG14234	Yes	No	No	No
FBgn0031068	Alr	Yes	No	No	No
FBgn0031077	CG15618	Yes	No	No	No
FBgn0031090	Rab35	Yes	No	No	No
FBgn0031091	CG9576	Yes	No	Yes	No
FBgn0031092	CG9577	Yes	No	No	No
FBgn0031097	obst-A	Yes	Yes	No	Yes
FBgn0031098	CG17068	Yes	No	No	No
FBgn0031099	CG17065	Yes	No	No	No
FBgn0031104	CG15460	Yes	No	No	No
FBgn0031107	HERC2	Yes	No	No	No
FBgn0031110	Obp19b	Yes	No	No	No
FBgn0031111	Obp19c	Yes	No	No	No
FBgn0031114	cactin	Yes	No	No	No
FBgn0031115	CG11710	Yes	No	No	No
FBgn0031118	RhoGAP19D	No	No	No	Yes
FBgn0031119	CG1812	Yes	No	Yes	No
FBgn0031144	CG1529	Yes	No	No	No
FBgn0031145	Ntf-2	Yes	No	No	No
FBgn0031150	bves	Yes	No	No	Yes
FBgn0031161	CG15445	Yes	No	No	No
FBgn0031174	CG1486	Yes	No	No	No
FBgn0031183	CG14621	Yes	No	Yes	No
FBgn0031191	Cp110	Yes	No	Yes	No
FBgn0031219	CG13694	Yes	No	No	No
FBgn0031224	CG11454	Yes	No	No	No
FBgn0031229	CG3436	Yes	No	No	No
FBgn0031231	mRpL10	Yes	No	No	No
FBgn0031232	CG11617	Yes	No	Yes	No
FBgn0031238	CG3645	Yes	No	No	No
FBgn0031244	CG11601	Yes	No	No	No
FBgn0031245	CG3625	Yes	No	No	No
FBgn0031247	CG11562	Yes	No	No	No
FBgn0031254	CG13692	Yes	No	No	No
FBgn0031255	BBS8	Yes	No	No	No
FBgn0031263	CG2789	No	No	No	Yes
FBgn0031265	CG2794	Yes	No	No	No
FBgn0031273	CG2839	Yes	No	No	Yes
FBgn0031282	pex12	Yes	No	No	No
FBgn0031283	CG15880	Yes	No	No	No
FBgn0031284	CG3876	Yes	No	Yes	No
FBgn0031301	CG14339	Yes	No	Yes	No
FBgn0031304	CG4552	No	No	No	Yes
FBgn0031307	CG4726	Yes	No	No	No
FBgn0031312	Tango14	No	No	Yes	Yes
FBgn0031313	CG5080	Yes	No	No	No
FBgn0031314	CG4785	Yes	No	No	No
FBgn0031315	CG14341	Yes	No	No	No
FBgn0031317	CG5118	Yes	No	No	No
FBgn0031321	Tgt	Yes	No	No	No
FBgn0031322	CG5001	Yes	No	No	No
FBgn0031344	CG7420	Yes	No	No	No
FBgn0031349	haf	No	No	Yes	Yes
FBgn0031351	CG14352	Yes	No	No	No
FBgn0031378	CG15362	Yes	No	No	No
FBgn0031379	CG7289	Yes	No	No	No
FBgn0031384	CG4238	Yes	No	No	No
FBgn0031390	tho2	Yes	No	No	No
FBgn0031391	CG11723	Yes	No	No	No
FBgn0031398	CG10880	Yes	No	No	No
FBgn0031399	mio	Yes	No	No	No
FBgn0031401	CG7082	Yes	No	No	No
FBgn0031403	CG15387	Yes	No	No	No
FBgn0031418	CG3609	Yes	No	No	No
FBgn0031419	CG15390	Yes	Yes	Yes	Yes
FBgn0031421	CG9867	Yes	No	No	No
FBgn0031429	CG15393	Yes	Yes	No	No
FBgn0031434	CG3227	No	No	Yes	No
FBgn0031435	CG9883	Yes	No	No	No
FBgn0031451	CG9961	Yes	No	Yes	No
FBgn0031453	CG9894	Yes	Yes	No	Yes
FBgn0031456	Trn-SR	Yes	No	No	No
FBgn0031458	aph-1	Yes	Yes	No	Yes
FBgn0031459	CG2862	Yes	No	No	No
FBgn0031464	Duox	No	Yes	No	Yes
FBgn0031474	CG2991	Yes	No	No	No
FBgn0031478	CG8814	No	No	No	Yes
FBgn0031479	Prx6005	Yes	No	No	No
FBgn0031483	CG9641	Yes	Yes	No	Yes
FBgn0031484	CG3165	Yes	No	No	No
FBgn0031485	CG9643	Yes	No	No	No
FBgn0031491	alpha4GT1	Yes	No	No	No
FBgn0031494	CG17219	Yes	No	Yes	No
FBgn0031498	CG17260	Yes	No	No	No
FBgn0031500	CG17221	Yes	No	Yes	No
FBgn0031505	CG12400	Yes	No	Yes	No
FBgn0031516	CG9663	No	No	No	Yes
FBgn0031529	CG9662	Yes	No	No	No
FBgn0031544	CG17593	Yes	No	No	No
FBgn0031566	CG2818	Yes	No	No	No
FBgn0031575	Cep97	Yes	No	No	No
FBgn0031590	CG3702	Yes	Yes	No	Yes
FBgn0031598	CG3338	Yes	No	No	No
FBgn0031599	Psf2	Yes	No	Yes	No
FBgn0031600	CG3652	Yes	No	No	No
FBgn0031601	Dim1	Yes	No	No	No
FBgn0031607	CG15440	Yes	No	No	No
FBgn0031610	CG15436	Yes	No	Yes	No
FBgn0031611	CG17840	Yes	No	No	No
FBgn0031630	CG15629	Yes	No	No	No
FBgn0031631	CG3225	Yes	No	No	No
FBgn0031633	CG2976	Yes	No	No	No
FBgn0031635	CG15626	Yes	No	No	No
FBgn0031636	CG12194	Yes	No	Yes	No
FBgn0031638	CG11927	Yes	No	No	No
FBgn0031644	CG15625	Yes	Yes	No	Yes
FBgn0031646	CG2837	No	No	No	Yes
FBgn0031651	mRpL24	No	No	No	Yes
FBgn0031654	Jon25Bii	Yes	No	No	No
FBgn0031655	Marcal1	Yes	No	No	No
FBgn0031656	CG8885	Yes	No	Yes	No
FBgn0031657	CG3756	Yes	No	No	No
FBgn0031662	CG3792	Yes	No	No	No
FBgn0031663	CG8891	Yes	No	No	No
FBgn0031664	CG8892	No	No	No	Yes
FBgn0031668	CG31917	Yes	No	No	No
FBgn0031670	CG3887	Yes	No	No	Yes
FBgn0031676	CG14040	Yes	No	No	No
FBgn0031677	CG14036	Yes	No	No	No
FBgn0031678	CG31918	Yes	No	No	No
FBgn0031682	CG5828	Yes	No	No	No
FBgn0031693	Cyp4ac1	Yes	No	Yes	Yes
FBgn0031696	Bub1	Yes	Yes	No	Yes
FBgn0031698	CG14023	Yes	No	No	No
FBgn0031707	CG14020	Yes	No	No	Yes
FBgn0031710	CG7371	Yes	No	No	No
FBgn0031711	CG6907	Yes	Yes	No	Yes
FBgn0031716	CG14015	Yes	No	No	No
FBgn0031717	Oscillin	Yes	No	No	No
FBgn0031752	CG9044	Yes	No	No	No
FBgn0031760	Tsp26A	Yes	No	No	No
FBgn0031764	CG9107	Yes	No	No	No
FBgn0031765	CG9109	Yes	No	No	No
FBgn0031771	CG9140	Yes	No	No	No
FBgn0031773	Fbw5	Yes	No	No	No
FBgn0031774	CG9147	No	Yes	No	No
FBgn0031775	CG9150	Yes	No	No	No
FBgn0031777	CG9154	Yes	No	No	No
FBgn0031813	CG9527	Yes	No	No	No
FBgn0031815	frj	Yes	No	Yes	Yes
FBgn0031817	CG9531	Yes	No	No	No
FBgn0031820	DLP	Yes	No	No	No
FBgn0031821	CG9542	Yes	No	No	No
FBgn0031830	CG11015	Yes	No	No	No
FBgn0031834	CG13766	Yes	No	No	No
FBgn0031836	CG11050	Yes	No	No	Yes
FBgn0031842	Tango1	Yes	No	No	Yes
FBgn0031844	CG13771	Yes	No	No	No
FBgn0031845	CG9232	Yes	No	Yes	No
FBgn0031848	CG11329	Yes	No	Yes	No
FBgn0031849	CG11327	No	Yes	No	Yes
FBgn0031875	CG3430	Yes	No	No	No
FBgn0031877	CG10399	Yes	No	No	No
FBgn0031878	sip2	Yes	No	No	No
FBgn0031879	uif	Yes	No	No	No
FBgn0031880	CG13776	Yes	No	No	No
FBgn0031881	CG3476	Yes	No	No	No
FBgn0031883	CG11266	Yes	No	Yes	No
FBgn0031886	Nuf2	Yes	No	No	No
FBgn0031893	CG4495	Yes	No	No	No
FBgn0031896	CG4502	Yes	No	No	No
FBgn0031903	Wnt10	Yes	Yes	Yes	Yes
FBgn0031909	CG5181	Yes	No	No	No
FBgn0031910	CG15818	Yes	No	Yes	No
FBgn0031912	CG5261	Yes	Yes	No	Yes
FBgn0031926	CG6739	No	Yes	No	No
FBgn0031952	cdc14	Yes	No	No	No
FBgn0031969	pes	No	No	No	Yes
FBgn0031986	CG8673	Yes	No	Yes	No
FBgn0031987	CG12375	Yes	No	No	No
FBgn0031988	CG8668	Yes	No	No	No
FBgn0031990	CG8552	No	No	No	Yes
FBgn0031992	CG8498	Yes	No	Yes	No
FBgn0031993	CG8486	Yes	Yes	No	Yes
FBgn0031997	CG8455	Yes	No	No	No
FBgn0031999	CG8419	Yes	No	No	No
FBgn0032000	CG8372	Yes	No	No	Yes
FBgn0032001	CG8360	Yes	Yes	No	No
FBgn0032013	Scgalpha	Yes	No	Yes	No
FBgn0032014	CG7840	Yes	No	Yes	No
FBgn0032018	CG7806	Yes	No	No	No
FBgn0032019	CG7795	Yes	No	No	No
FBgn0032020	CG7787	Yes	No	Yes	No
FBgn0032026	CG7627	No	Yes	No	Yes
FBgn0032029	CG17292	Yes	No	No	No
FBgn0032030	CG17293	Yes	No	No	No
FBgn0032032	CG17294	Yes	Yes	No	Yes
FBgn0032035	CG13393	Yes	No	No	No
FBgn0032040	CG13386	Yes	No	No	No
FBgn0032042	CG13398	Yes	No	No	No
FBgn0032047	CG13088	Yes	No	No	No
FBgn0032052	CG13089	Yes	No	No	No
FBgn0032053	mRpL51	Yes	No	No	No
FBgn0032076	CG9510	Yes	No	No	No
FBgn0032077	CG9515	Yes	No	No	No
FBgn0032078	C1GalTA	Yes	No	No	No
FBgn0032115	CG4438	Yes	No	No	No
FBgn0032120	CG33298	Yes	No	Yes	No
FBgn0032123	Oatp30B	Yes	No	Yes	No
FBgn0032149	CG4036	Yes	No	No	No
FBgn0032150	CG13123	Yes	No	No	No
FBgn0032153	CG4537	Yes	No	No	No
FBgn0032154	CG5924	Yes	No	No	No
FBgn0032161	CG4594	Yes	No	No	No
FBgn0032162	CG4592	Yes	No	No	No
FBgn0032163	CG13125	Yes	No	No	No
FBgn0032167	CG5853	No	Yes	No	Yes
FBgn0032170	CG4658	Yes	Yes	No	Yes
FBgn0032191	CG5734	Yes	No	No	No
FBgn0032192	CG5731	Yes	No	No	No
FBgn0032193	CG5727	Yes	No	No	No
FBgn0032194	CG4901	No	No	No	Yes
FBgn0032196	CG5708	Yes	No	No	No
FBgn0032198	eEF1delta	Yes	No	No	No
FBgn0032202	CG18619	Yes	No	Yes	No
FBgn0032205	CG4957	Yes	No	No	No
FBgn0032208	CG5604	Yes	No	No	No
FBgn0032209	Hand	Yes	No	No	No
FBgn0032211	CG13138	Yes	No	Yes	No
FBgn0032214	CG4968	Yes	No	No	Yes
FBgn0032215	CG5385	Yes	No	Yes	No
FBgn0032217	CG4972	Yes	No	No	Yes
FBgn0032218	CG5381	Yes	No	Yes	No
FBgn0032219	CG4995	Yes	No	No	No
FBgn0032221	CG5375	Yes	No	Yes	No
FBgn0032222	CG5037	Yes	No	No	No
FBgn0032223	GATAd	Yes	No	Yes	No
FBgn0032224	Sps2	Yes	No	No	No
FBgn0032225	CG5022	Yes	No	No	No
FBgn0032228	CG5367	Yes	No	Yes	No
FBgn0032229	CG5045	Yes	No	No	No
FBgn0032230	lft	Yes	No	No	No
FBgn0032233	dpr19	Yes	No	Yes	No
FBgn0032234	CG5091	Yes	No	Yes	No
FBgn0032237	CG5362	No	No	Yes	No
FBgn0032240	CG17768	Yes	No	Yes	No
FBgn0032243	Klp31E	Yes	Yes	No	Yes
FBgn0032244	RfC3	Yes	No	No	No
FBgn0032248	CG5343	Yes	No	No	No
FBgn0032249	CG5337	Yes	No	Yes	No
FBgn0032250	CG5198	Yes	No	Yes	No
FBgn0032256	RluA-2	Yes	No	No	No
FBgn0032259	CG6144	Yes	No	No	No
FBgn0032271	CG7329	Yes	No	No	No
FBgn0032292	CG6750	No	No	Yes	No
FBgn0032294	CG6737	Yes	No	Yes	No
FBgn0032305	CG6700	Yes	No	No	No
FBgn0032329	Art8	Yes	No	No	No
FBgn0032330	Samuel	Yes	Yes	No	No
FBgn0032339	CG4705	No	No	No	Yes
FBgn0032345	CG14921	Yes	No	No	No
FBgn0032346	Csl4	Yes	No	No	No
FBgn0032354	CG4788	Yes	No	No	Yes
FBgn0032359	Osi21	Yes	Yes	No	No
FBgn0032360	CG14926	No	Yes	No	Yes
FBgn0032378	CycY	Yes	No	No	No
FBgn0032387	CG16965	Yes	No	No	Yes
FBgn0032390	dgt2	Yes	No	Yes	No
FBgn0032391	escl	Yes	No	No	No
FBgn0032393	CG12264	Yes	No	No	Yes
FBgn0032394	CG6746	Yes	Yes	Yes	Yes
FBgn0032398	CG6766	Yes	No	No	No
FBgn0032399	CG6785	Yes	No	No	No
FBgn0032400	CG6770	Yes	No	No	No
FBgn0032401	CG6792	Yes	No	No	No
FBgn0032402	CG14945	Yes	No	No	No
FBgn0032421	CG17218	Yes	No	No	No
FBgn0032428	CG6405	Yes	No	No	No
FBgn0032446	CG5780	Yes	No	Yes	No
FBgn0032447	PICK1	Yes	No	No	No
FBgn0032448	CG5781	Yes	No	No	No
FBgn0032449	CG17036	Yes	No	No	No
FBgn0032452	CG15484	Yes	No	No	No
FBgn0032453	CG6180	Yes	No	No	No
FBgn0032456	MRP	No	No	No	Yes
FBgn0032465	CG12404	Yes	No	Yes	No
FBgn0032470	CG5142	Yes	Yes	No	No
FBgn0032474	DnaJ-H	No	Yes	No	Yes
FBgn0032475	Sfmbt	Yes	Yes	Yes	No
FBgn0032482	Pect	Yes	No	No	No
FBgn0032487	Ski6	Yes	No	No	No
FBgn0032488	CG16812	Yes	No	No	No
FBgn0032513	CG6565	Yes	Yes	No	Yes
FBgn0032517	CG7099	Yes	No	Yes	Yes
FBgn0032519	CG16957	No	No	Yes	No
FBgn0032520	CG10859	Yes	No	No	No
FBgn0032524	CG9267	Yes	No	No	No
FBgn0032546	pburs	No	No	Yes	No
FBgn0032563	CG15258	Yes	No	No	No
FBgn0032586	Tpr2	Yes	No	No	No
FBgn0032587	CG5953	Yes	No	No	Yes
FBgn0032595	CG17996	Yes	No	No	No
FBgn0032598	ChLD3	Yes	No	No	No
FBgn0032635	CG15141	No	No	No	Yes
FBgn0032640	Sgt	Yes	No	No	No
FBgn0032642	CG5110	Yes	No	No	No
FBgn0032644	CG5131	Yes	No	No	No
FBgn0032656	CG5674	Yes	No	No	No
FBgn0032682	CG10176	Yes	No	No	No
FBgn0032693	Cyp310a1	No	No	No	Yes
FBgn0032698	CG10336	Yes	Yes	No	Yes
FBgn0032699	CG10383	Yes	No	No	No
FBgn0032700	CG10338	Yes	No	No	No
FBgn0032703	CG10343	Yes	No	No	Yes
FBgn0032705	Grip71	Yes	No	No	No
FBgn0032715	CG17597	Yes	No	Yes	Yes
FBgn0032720	mRpL13	Yes	No	No	No
FBgn0032721	CG10602	Yes	Yes	No	No
FBgn0032723	ssp3	Yes	No	Yes	No
FBgn0032724	CG10428	Yes	Yes	No	Yes
FBgn0032725	Nedd8	Yes	No	No	No
FBgn0032726	CG10621	Yes	No	No	No
FBgn0032728	Tango6	Yes	No	No	No
FBgn0032729	CG10639	Yes	No	No	No
FBgn0032730	CG10431	Yes	No	Yes	No
FBgn0032744	CG15173	Yes	No	Yes	No
FBgn0032746	CG10470	Yes	No	No	No
FBgn0032750	CG10495	Yes	No	No	No
FBgn0032751	CG17343	No	No	Yes	No
FBgn0032763	CG17568	Yes	No	No	No
FBgn0032769	CG10750	Yes	Yes	Yes	Yes
FBgn0032775	CG17544	Yes	No	No	Yes
FBgn0032780	CG13085	Yes	No	No	No
FBgn0032781	CG9987	Yes	No	No	No
FBgn0032788	CG13084	Yes	No	Yes	No
FBgn0032789	CG13083	Yes	No	No	No
FBgn0032791	CG18094	Yes	No	No	No
FBgn0032799	CG10166	Yes	No	No	No
FBgn0032800	CG10137	Yes	No	No	No
FBgn0032801	CG10165	Yes	No	No	No
FBgn0032804	CG13081	Yes	No	No	No
FBgn0032813	CG10262	Yes	No	Yes	No
FBgn0032816	Nf-YB	Yes	No	Yes	No
FBgn0032818	CG10628	Yes	No	Yes	No
FBgn0032819	CG10463	No	No	No	Yes
FBgn0032822	CG10466	Yes	No	No	No
FBgn0032833	CG10664	Yes	No	No	No
FBgn0032845	CG10747	No	Yes	No	No
FBgn0032846	CG10721	Yes	No	No	No
FBgn0032847	Taf13	Yes	No	No	No
FBgn0032848	CG10722	No	Yes	Yes	Yes
FBgn0032849	mRpS18B	Yes	No	No	No
FBgn0032853	CG10651	No	No	No	Yes
FBgn0032863	cdc23	No	No	No	Yes
FBgn0032864	CG2493	Yes	No	No	No
FBgn0032870	CG2608	Yes	No	No	Yes
FBgn0032876	CG1962	Yes	No	No	No
FBgn0032877	CG2617	Yes	No	No	No
FBgn0032881	CG9319	Yes	No	No	No
FBgn0032886	CG9328	Yes	No	No	No
FBgn0032901	CG9339	Yes	No	No	No
FBgn0032904	Mtp	Yes	No	No	No
FBgn0032907	CG9272	Yes	No	No	No
FBgn0032913	CG9259	Yes	No	No	No
FBgn0032916	CG9257	Yes	No	No	No
FBgn0032921	Mpp6	Yes	No	No	No
FBgn0032923	CG9248	Yes	No	No	No
FBgn0032926	CG9243	Yes	No	No	No
FBgn0032929	Mcm10	Yes	No	No	No
FBgn0032935	CG8678	Yes	No	No	No
FBgn0032940	Mio	No	No	No	Yes
FBgn0032949	CG3305	Yes	No	No	No
FBgn0032956	Cul-2	Yes	No	Yes	No
FBgn0032957	CG2225	Yes	No	No	No
FBgn0032961	CG1416	Yes	No	No	Yes
FBgn0032965	CG11629	Yes	No	No	No
FBgn0032974	CG3651	Yes	No	No	No
FBgn0032987	RpL21	Yes	No	Yes	No
FBgn0032988	Tif-IA	Yes	No	No	No
FBgn0032997	CG17486	Yes	No	No	No
FBgn0033000	CG14464	Yes	No	Yes	No
FBgn0033005	CG3107	Yes	No	Yes	No
FBgn0033010	Atf6	Yes	No	Yes	No
FBgn0033015	d4	Yes	No	Yes	No
FBgn0033017	CG10465	Yes	No	Yes	No
FBgn0033019	CG10395	Yes	No	No	Yes
FBgn0033020	CG10396	Yes	No	Yes	No
FBgn0033021	CG10417	Yes	No	Yes	No
FBgn0033029	l(2)NC136	Yes	No	No	Yes
FBgn0033031	CG8245	Yes	No	Yes	No
FBgn0033032	CG1298	Yes	No	Yes	No
FBgn0033033	scaf	Yes	No	No	No
FBgn0033038	CG7791	Yes	No	No	No
FBgn0033039	gp210	Yes	No	No	No
FBgn0033048	CG7881	Yes	No	No	No
FBgn0033049	CG14471	Yes	No	No	No
FBgn0033052	SCAP	Yes	No	No	No
FBgn0033054	CG14591	Yes	No	No	No
FBgn0033055	tbce	Yes	No	Yes	No
FBgn0033060	CG7849	No	Yes	No	Yes
FBgn0033073	bin3	No	Yes	No	Yes
FBgn0033076	CG15233	No	No	No	Yes
FBgn0033085	CG15908	Yes	No	No	No
FBgn0033086	CG9410	Yes	No	No	No
FBgn0033088	CG3271	Yes	No	No	No
FBgn0033089	CG17266	Yes	No	No	No
FBgn0033092	CG9422	Yes	No	No	No
FBgn0033096	ZIP1	Yes	No	No	No
FBgn0033101	CG9436	Yes	No	No	No
FBgn0033104	CG15237	Yes	No	No	No
FBgn0033109	coro	Yes	No	No	No
FBgn0033121	Cyp6u1	No	Yes	No	Yes
FBgn0033122	CG17002	Yes	Yes	No	No
FBgn0033127	Tsp42Ef	Yes	No	No	No
FBgn0033158	CG12164	Yes	No	No	No
FBgn0033159	Dscam	Yes	No	No	No
FBgn0033174	CG11125	Yes	No	Yes	No
FBgn0033178	CG11127	Yes	No	No	No
FBgn0033186	CG1602	Yes	No	No	No
FBgn0033188	CG1600	No	Yes	No	Yes
FBgn0033191	CG1598	Yes	No	No	No
FBgn0033199	CG17985	Yes	No	Yes	No
FBgn0033202	Gr43b	Yes	No	No	No
FBgn0033203	CG2070	Yes	No	No	No
FBgn0033204	CG2065	Yes	No	No	No
FBgn0033205	CG2064	Yes	No	No	No
FBgn0033207	CG12826	Yes	No	No	No
FBgn0033208	mRpL52	Yes	No	No	No
FBgn0033209	CG12107	Yes	No	No	No
FBgn0033215	CG1942	Yes	No	No	No
FBgn0033226	CG1882	Yes	No	No	No
FBgn0033234	CG8791	Yes	No	Yes	No
FBgn0033240	CG2906	Yes	No	No	No
FBgn0033241	CG2915	Yes	No	No	No
FBgn0033252	CG12769	No	No	No	Yes
FBgn0033258	CG8712	Yes	No	No	No
FBgn0033259	CG11210	Yes	No	No	No
FBgn0033264	Nup50	Yes	No	No	No
FBgn0033265	coil	Yes	No	No	No
FBgn0033266	Socs44A	Yes	No	No	No
FBgn0033271	CG8708	Yes	No	No	No
FBgn0033274	CG14757	Yes	No	No	No
FBgn0033282	pdm3	No	No	Yes	Yes
FBgn0033337	CG8272	Yes	No	No	No
FBgn0033340	CG13751	Yes	No	Yes	No
FBgn0033341	MrgBP	Yes	No	No	No
FBgn0033342	CG8258	No	No	No	Yes
FBgn0033348	CG8247	Yes	No	No	No
FBgn0033354	CG13745	Yes	No	No	No
FBgn0033355	CG13748	Yes	No	No	No
FBgn0033357	Tom7	No	No	No	Yes
FBgn0033365	CG8170	Yes	Yes	Yes	No
FBgn0033369	CG8197	No	No	No	Yes
FBgn0033372	CG13742	Yes	No	No	No
FBgn0033373	CG8080	Yes	No	No	No
FBgn0033374	CG13741	Yes	No	Yes	No
FBgn0033375	CG8078	Yes	No	No	No
FBgn0033376	CG8777	No	No	Yes	No
FBgn0033378	tsu	Yes	Yes	Yes	Yes
FBgn0033380	Phax	Yes	No	No	No
FBgn0033382	Hydr1	Yes	No	No	No
FBgn0033389	Rad51C	Yes	No	Yes	No
FBgn0033391	CG8026	Yes	No	No	No
FBgn0033395	Cyp4p2	Yes	No	No	No
FBgn0033400	CG2063	Yes	No	No	No
FBgn0033402	Myd88	Yes	No	No	No
FBgn0033421	CG1888	Yes	Yes	No	Yes
FBgn0033426	CG1814	Yes	No	Yes	No
FBgn0033429	CG12929	Yes	No	No	No
FBgn0033431	CG1827	Yes	No	No	No
FBgn0033448	hebe	Yes	No	No	No
FBgn0033449	CG1663	Yes	No	No	No
FBgn0033451	CG1665	Yes	No	No	No
FBgn0033452	CG1599	Yes	No	No	No
FBgn0033453	CG1667	Yes	No	Yes	No
FBgn0033466	CG12130	Yes	Yes	Yes	Yes
FBgn0033468	CG1418	Yes	No	No	No
FBgn0033469	CG12133	Yes	No	Yes	No
FBgn0033471	CG12134	Yes	No	No	No
FBgn0033473	CG12128	Yes	No	No	No
FBgn0033474	CG1407	Yes	No	No	No
FBgn0033475	CG12129	No	Yes	No	Yes
FBgn0033477	CG12918	Yes	No	No	No
FBgn0033478	magu	Yes	No	No	No
FBgn0033480	mRpL42	Yes	No	No	No
FBgn0033481	CG12920	Yes	No	No	No
FBgn0033482	CG1371	Yes	No	No	No
FBgn0033491	CG18011	Yes	No	No	No
FBgn0033495	CG12214	Yes	Yes	No	Yes
FBgn0033504	CAP	No	Yes	No	No
FBgn0033507	CG12909	No	No	No	Yes
FBgn0033527	CG11777	Yes	No	No	No
FBgn0033538	CG11883	No	Yes	No	No
FBgn0033541	CG12934	Yes	No	No	No
FBgn0033543	CG12338	Yes	No	No	No
FBgn0033544	CG7220	Yes	No	No	No
FBgn0033547	CG12935	Yes	No	Yes	Yes
FBgn0033549	mms4	Yes	No	No	No
FBgn0033550	CG12341	Yes	No	No	No
FBgn0033554	Lsm10	Yes	No	No	No
FBgn0033557	CG12325	Yes	No	No	No
FBgn0033562	CG6751	Yes	No	No	No
FBgn0033564	CG11919	Yes	No	Yes	Yes
FBgn0033566	CG18004	Yes	No	No	No
FBgn0033569	CG12942	Yes	Yes	No	Yes
FBgn0033581	CG12391	Yes	No	No	No
FBgn0033608	CG13220	Yes	No	No	Yes
FBgn0033609	fbl6	Yes	No	No	No
FBgn0033614	Obp47b	Yes	No	No	No
FBgn0033636	tou	Yes	Yes	Yes	Yes
FBgn0033639	CG9003	Yes	No	No	No
FBgn0033650	CG13193	No	No	No	Yes
FBgn0033656	S2P	Yes	No	No	No
FBgn0033669	CG8979	Yes	No	No	No
FBgn0033673	CG8298	Yes	No	No	No
FBgn0033674	CG8964	Yes	No	No	No
FBgn0033687	CG8407	Yes	No	No	No
FBgn0033691	CG8860	Yes	No	Yes	Yes
FBgn0033692	wash	Yes	No	Yes	No
FBgn0033696	Cyp6g2	Yes	No	No	No
FBgn0033713	CG8841	No	No	No	Yes
FBgn0033715	CG8490	Yes	No	No	No
FBgn0033717	CG8839	Yes	No	Yes	No
FBgn0033735	CG8525	Yes	No	Yes	No
FBgn0033741	CG8545	Yes	No	No	No
FBgn0033748	vis	Yes	No	No	No
FBgn0033749	achi	Yes	No	No	No
FBgn0033750	CG13151	Yes	No	No	No
FBgn0033752	CG8569	Yes	No	Yes	No
FBgn0033753	Cyp301a1	Yes	No	No	No
FBgn0033755	ClC-b	No	No	Yes	No
FBgn0033762	CG8632	No	No	No	Yes
FBgn0033767	CG13148	Yes	No	No	No
FBgn0033770	CG12442	Yes	No	No	No
FBgn0033777	CG17574	Yes	No	No	No
FBgn0033778	CG3790	Yes	No	No	No
FBgn0033781	CG13319	Yes	No	No	No
FBgn0033782	sug	Yes	No	No	No
FBgn0033787	CG13321	Yes	No	Yes	Yes
FBgn0033788	CG13323	Yes	No	No	Yes
FBgn0033799	GLaz	Yes	No	No	No
FBgn0033806	FLASH	Yes	No	No	No
FBgn0033808	CG4627	Yes	No	No	No
FBgn0033809	CG4630	Yes	No	Yes	No
FBgn0033810	CG4646	Yes	No	No	No
FBgn0033813	CG12765	Yes	No	No	No
FBgn0033815	CG4676	Yes	No	No	No
FBgn0033846	mip120	No	No	Yes	No
FBgn0033853	CG6145	Yes	Yes	No	No
FBgn0033880	CG6553	Yes	No	No	No
FBgn0033884	CG13344	Yes	No	No	No
FBgn0033890	CG13350	Yes	No	Yes	No
FBgn0033891	CG8067	Yes	No	No	Yes
FBgn0033899	CG13016	Yes	No	No	No
FBgn0033900	CG8257	Yes	No	No	No
FBgn0033901	O-fut1	Yes	No	No	No
FBgn0033902	Tango7	Yes	No	No	No
FBgn0033903	CG8323	Yes	No	No	No
FBgn0033904	CG18327	Yes	No	Yes	No
FBgn0033905	CG18324	Yes	No	No	No
FBgn0033906	CG8331	No	No	Yes	No
FBgn0033916	CG8494	Yes	Yes	No	Yes
FBgn0033918	CG8531	No	No	No	Yes
FBgn0033919	CG8547	Yes	No	No	No
FBgn0033926	Arc1	Yes	No	No	No
FBgn0033936	CG17386	No	No	No	Yes
FBgn0033945	CG12868	Yes	No	No	No
FBgn0033948	CG12863	Yes	No	Yes	No
FBgn0033951	CG10139	No	No	No	Yes
FBgn0033962	CG10153	Yes	No	No	No
FBgn0033972	Ciao1	Yes	No	No	No
FBgn0033973	HPS1	No	No	No	Yes
FBgn0033987	CG12424	Yes	No	No	No
FBgn0033989	CG7639	Yes	No	No	Yes
FBgn0033994	CG7544	Yes	No	No	No
FBgn0033996	CG11807	Yes	No	No	No
FBgn0033999	CG8093	Yes	No	Yes	No
FBgn0034027	CG8187	Yes	No	No	No
FBgn0034029	eIF2B-gamma	Yes	No	No	No
FBgn0034035	CG8207	Yes	No	No	No
FBgn0034058	CG8315	Yes	No	Yes	No
FBgn0034059	CG8320	Yes	No	No	No
FBgn0034067	CG8399	Yes	No	No	No
FBgn0034075	Asph	Yes	Yes	Yes	Yes
FBgn0034081	CG10731	Yes	No	Yes	No
FBgn0034082	CG10734	Yes	No	No	No
FBgn0034084	CG8435	Yes	No	No	No
FBgn0034086	CG8441	No	No	Yes	Yes
FBgn0034087	CG8443	Yes	No	No	No
FBgn0034089	CG8446	Yes	No	No	No
FBgn0034095	CG15701	Yes	No	Yes	No
FBgn0034109	CG7747	Yes	No	No	No
FBgn0034113	CG8060	Yes	No	No	No
FBgn0034114	CG4282	Yes	No	No	No
FBgn0034117	CG7997	Yes	No	No	No
FBgn0034142	CG8306	Yes	No	No	No
FBgn0034155	unc-104	Yes	No	No	No
FBgn0034176	ste24a	Yes	No	No	No
FBgn0034177	CG6796	Yes	No	No	No
FBgn0034179	CG6805	Yes	No	No	Yes
FBgn0034180	CG15609	Yes	No	Yes	No
FBgn0034181	CG8963	Yes	No	No	Yes
FBgn0034184	CG9646	Yes	No	Yes	No
FBgn0034187	CG6967	Yes	No	No	No
FBgn0034215	CG4802	Yes	No	No	Yes
FBgn0034221	CG10764	Yes	No	No	No
FBgn0034228	CG14479	Yes	Yes	No	Yes
FBgn0034231	Apc10	Yes	No	No	No
FBgn0034232	CG4866	Yes	No	No	No
FBgn0034239	CG18631	Yes	No	No	No
FBgn0034242	CG14480	Yes	No	Yes	No
FBgn0034246	Dcr-2	Yes	No	No	No
FBgn0034247	CG6484	Yes	No	Yes	No
FBgn0034248	CG14483	Yes	No	No	No
FBgn0034258	eIF3-S8	Yes	No	No	No
FBgn0034264	CG10933	Yes	No	No	No
FBgn0034266	CG4975	Yes	No	No	No
FBgn0034267	CG4984	Yes	No	No	No
FBgn0034270	CG6401	Yes	No	No	No
FBgn0034275	CG5002	Yes	No	No	No
FBgn0034278	CG14488	Yes	No	No	No
FBgn0034299	CG5757	Yes	No	Yes	No
FBgn0034300	CG5098	Yes	Yes	No	Yes
FBgn0034307	CG10914	Yes	No	No	No
FBgn0034308	CG10915	No	No	No	Yes
FBgn0034312	CG10916	Yes	No	Yes	No
FBgn0034314	nopo	Yes	No	No	No
FBgn0034321	CG14502	Yes	No	Yes	Yes
[truncated: 1,853 more rows]
