# Supplementary material for: Genome-Wide Tissue-Specific Occupancy of the Hox Protein Ultrabithorax and Hox Cofactor Homothorax in Drosophila
Source: PLoS One. 2011 Apr 5;6(4):e14686. doi: 10.1371/journal.pone.0014686 (PMC3071676; doi:10.1371/journal.pone.0014686)
Supplement: Table S8 — Significant Gene Ontology categories for leg datasets. Biological process or molecular function GO categories with Bonferroni-corrected p-value<0.01 are represented for the indicated Ubx and/or Hth, haltere datasets. (0.03 MB XLS) [file pone.0014686.s013.xls]

## Sheet: Leg_Ubx_overall
Leg Ubx overall
Category	Term	Fold Enrichment	p-value (Bonferroni)
GOTERM_MF_FAT	GO:0003677~DNA binding	1.93236	8.88267e-08
GOTERM_BP_FAT	GO:0006259~DNA metabolic process	2.90135	1.80603e-05
GOTERM_BP_FAT	GO:0051252~regulation of RNA metabolic process	1.76364	0.00526317
GOTERM_MF_FAT	GO:0003700~transcription factor activity	1.99642	0.00532208
GOTERM_BP_FAT	GO:0007444~imaginal disc development	2.01899	0.0073649
GOTERM_BP_FAT	GO:0045449~regulation of transcription	1.67007	0.00941347
GOTERM_BP_FAT	GO:0002165~instar larval or pupal development	1.99001	0.0109544

## Sheet: Leg_Hth_overall
Leg Hth overall
Category	Term	Fold Enrichment	p-value (Bonferroni)
GOTERM_BP_FAT	GO:0045449~regulation of transcription	1.9796	1.23176e-09
GOTERM_BP_FAT	GO:0002165~instar larval or pupal development	2.42038	5.02129e-09
GOTERM_BP_FAT	GO:0009791~post-embryonic development	2.36398	1.0931e-08
GOTERM_BP_FAT	GO:0007444~imaginal disc development	2.38645	2.13156e-08
GOTERM_BP_FAT	GO:0006350~transcription	2.29731	2.15168e-08
GOTERM_MF_FAT	GO:0030528~transcription regulator activity	1.96225	4.39392e-08
GOTERM_MF_FAT	GO:0003677~DNA binding	1.7971	5.44457e-07
GOTERM_BP_FAT	GO:0009886~post-embryonic morphogenesis	2.38165	9.75571e-07
GOTERM_BP_FAT	GO:0035220~wing disc development	2.58622	1.00334e-06
GOTERM_BP_FAT	GO:0048707~instar larval or pupal morphogenesis	2.38177	1.40723e-06
GOTERM_BP_FAT	GO:0007552~metamorphosis	2.32244	2.64205e-06
GOTERM_BP_FAT	GO:0048737~imaginal disc-derived appendage development	2.63881	6.65807e-06
GOTERM_BP_FAT	GO:0048736~appendage development	2.60663	9.87493e-06
GOTERM_BP_FAT	GO:0035120~post-embryonic appendage morphogenesis	2.67568	1.03586e-05
GOTERM_BP_FAT	GO:0035114~imaginal disc-derived appendage morphogenesis	2.62335	1.2381e-05
GOTERM_BP_FAT	GO:0048563~post-embryonic organ morphogenesis	2.45855	1.32179e-05
GOTERM_BP_FAT	GO:0007560~imaginal disc morphogenesis	2.45855	1.32179e-05
GOTERM_BP_FAT	GO:0035107~appendage morphogenesis	2.59083	1.82824e-05
GOTERM_BP_FAT	GO:0007389~pattern specification process	2.04837	1.89487e-05
GOTERM_BP_FAT	GO:0048569~post-embryonic organ development	2.39891	2.07709e-05
GOTERM_BP_FAT	GO:0003002~regionalization	2.04013	6.59907e-05
GOTERM_BP_FAT	GO:0006357~regulation of transcription from RNA polymerase II promoter	2.74601	7.41247e-05
GOTERM_BP_FAT	GO:0007476~imaginal disc-derived wing morphogenesis	2.6146	7.59297e-05
GOTERM_BP_FAT	GO:0007472~wing disc morphogenesis	2.59083	9.82591e-05
GOTERM_BP_FAT	GO:0007424~open tracheal system development	2.9803	0.000106328
GOTERM_BP_FAT	GO:0060541~respiratory system development	2.9803	0.000106328
GOTERM_BP_FAT	GO:0006355~regulation of transcription, DNA-dependent	1.8394	0.000166231
GOTERM_MF_FAT	GO:0003700~transcription factor activity	2.04264	0.000192332
GOTERM_BP_FAT	GO:0051252~regulation of RNA metabolic process	1.76543	0.000361667
GOTERM_MF_FAT	GO:0003702~RNA polymerase II transcription factor activity	2.27816	0.000585771
GOTERM_BP_FAT	GO:0030182~neuron differentiation	1.95104	0.00306698
GOTERM_BP_FAT	GO:0007423~sensory organ development	1.94628	0.0033118
GOTERM_BP_FAT	GO:0007447~imaginal disc pattern formation	3.26552	0.00422629
GOTERM_MF_FAT	GO:0016564~transcription repressor activity	2.9415	0.00524392
GOTERM_BP_FAT	GO:0035222~wing disc pattern formation	3.77194	0.00574733
GOTERM_MF_FAT	GO:0000166~nucleotide binding	1.44487	0.00603374
GOTERM_BP_FAT	GO:0010605~negative regulation of macromolecule metabolic process	2.06776	0.00679225
GOTERM_BP_FAT	GO:0051726~regulation of cell cycle	2.57522	0.0071848
GOTERM_BP_FAT	GO:0003006~reproductive developmental process	1.80231	0.00739715
GOTERM_BP_FAT	GO:0010604~positive regulation of macromolecule metabolic process	2.70942	0.00944435

## Sheet: Leg_Ubx+Hth
Leg Ubx+Hth
Category	Term	Fold Enrichment	p-value (Bonferroni)
GOTERM_MF_FAT	GO:0003677~DNA binding	2.99128	3.16196e-07
GOTERM_BP_FAT	GO:0048737~imaginal disc-derived appendage development	5.30418	1.26235e-05
GOTERM_BP_FAT	GO:0048736~appendage development	5.23949	1.53091e-05
GOTERM_BP_FAT	GO:0007444~imaginal disc development	3.95171	2.16788e-05
GOTERM_BP_FAT	GO:0002165~instar larval or pupal development	3.89498	2.84283e-05
GOTERM_BP_FAT	GO:0009791~post-embryonic development	3.75139	5.71638e-05
GOTERM_BP_FAT	GO:0035114~imaginal disc-derived appendage morphogenesis	5.10911	6.12197e-05
GOTERM_BP_FAT	GO:0035107~appendage morphogenesis	5.04577	7.35286e-05
GOTERM_BP_FAT	GO:0045449~regulation of transcription	2.8018	7.41327e-05
GOTERM_MF_FAT	GO:0003682~chromatin binding	10.4846	9.27239e-05
GOTERM_BP_FAT	GO:0048563~post-embryonic organ morphogenesis	4.53843	0.000140298
GOTERM_BP_FAT	GO:0007560~imaginal disc morphogenesis	4.53843	0.000140298
GOTERM_BP_FAT	GO:0010629~negative regulation of gene expression	4.76983	0.000166772
GOTERM_BP_FAT	GO:0035120~post-embryonic appendage morphogenesis	5.03598	0.000200225
GOTERM_BP_FAT	GO:0048569~post-embryonic organ development	4.33978	0.000275114
GOTERM_BP_FAT	GO:0048707~instar larval or pupal morphogenesis	3.90995	0.00059474
GOTERM_BP_FAT	GO:0007476~imaginal disc-derived wing morphogenesis	4.97891	0.000610354
GOTERM_BP_FAT	GO:0035220~wing disc development	4.34547	0.000630868
GOTERM_BP_FAT	GO:0007472~wing disc morphogenesis	4.93364	0.000686227
GOTERM_BP_FAT	GO:0009886~post-embryonic morphogenesis	3.84349	0.000772947
GOTERM_BP_FAT	GO:0007552~metamorphosis	3.74793	0.0011328
GOTERM_BP_FAT	GO:0045570~regulation of imaginal disc growth	27.135	0.00178778
GOTERM_BP_FAT	GO:0003002~regionalization	3.28728	0.00223341
GOTERM_BP_FAT	GO:0060541~respiratory system development	5.76398	0.00229043
GOTERM_BP_FAT	GO:0007424~open tracheal system development	5.76398	0.00229043
GOTERM_BP_FAT	GO:0010605~negative regulation of macromolecule metabolic process	3.85198	0.00334587
GOTERM_MF_FAT	GO:0003700~transcription factor activity	3.27746	0.00378787
GOTERM_MF_FAT	GO:0030528~transcription regulator activity	2.55813	0.00416009
GOTERM_BP_FAT	GO:0007389~pattern specification process	3.10922	0.00539407
GOTERM_BP_FAT	GO:0046620~regulation of organ growth	14.8395	0.00620944
GOTERM_BP_FAT	GO:0006355~regulation of transcription, DNA-dependent	2.77114	0.00683977
GOTERM_BP_FAT	GO:0016481~negative regulation of transcription	4.58805	0.00998291
